# Supplementary material for: Interplay between conformational flexibility, intermolecular H-bonding and 3d-metal cation extraction ability in a series of thiacalix[4]arene lower rim disubstituted Schiff base derivatives
Source: Royal Society of Chemistry journal article supplement (doi:10.1039/d4cp03393k), 2024-11-20
Supplement: d4cp03393k1.pdf [file d4cp03393k1.pdf]

Supplementary Material for:

**Interplay between conformational flexibility, intermolecular H-bonding and 3d-metal cations extraction ability in a series of (thia)calix[4]arene lower rim disubstituted Schiff base derivatives**

Iuliia V. Strelnikova<sup>a,b</sup>, Alexander S. Ovsyannikov<sup>a,\*</sup>, Aidar T. Gubaidullin<sup>a</sup>, Artem S. Agarkov<sup>a</sup>, Sophiya R. Kleshnina<sup>b</sup>, A. A. Iova<sup>b</sup>, Victor L. Furer<sup>c</sup>, Alexander Vandyukov<sup>a</sup>, Svetlana E. Solovieva<sup>a</sup>, Igor S. Antipin<sup>b</sup>

<sup>a</sup>*Arbuzov Institute of Organic and Physical Chemistry, FRC Kazan Scientific Center, Russian Academy of Sciences, Arbuzova 8 str, Kazan 420088, Russian Federation*

<sup>b</sup>*Kazan Federal University, Kremlevskaya 18 str, Kazan 420008, Russian Federation*

<sup>c</sup>*Kazan State Architect and Civil Engineering University, 1 Zelenaya Str., 420043 Kazan, Russian Federation*

*\* Corresponding author:*

*e-mail address: [osaalex2007@ramble.ru](mailto:osaalex2007@ramble.ru)*

# 1. Spectral characterization of the ligands 3-6

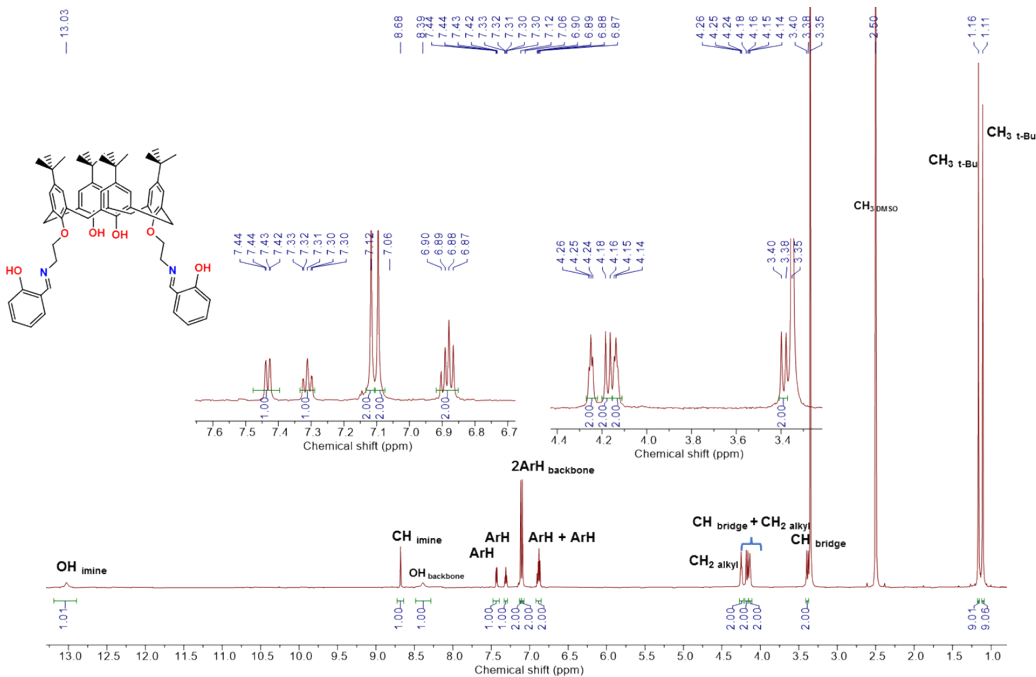

**Figure S1.**  $^1\text{H}$  NMR spectrum for **3** ( $\text{CDCl}_3$ , 400 MHz, 25 °C).

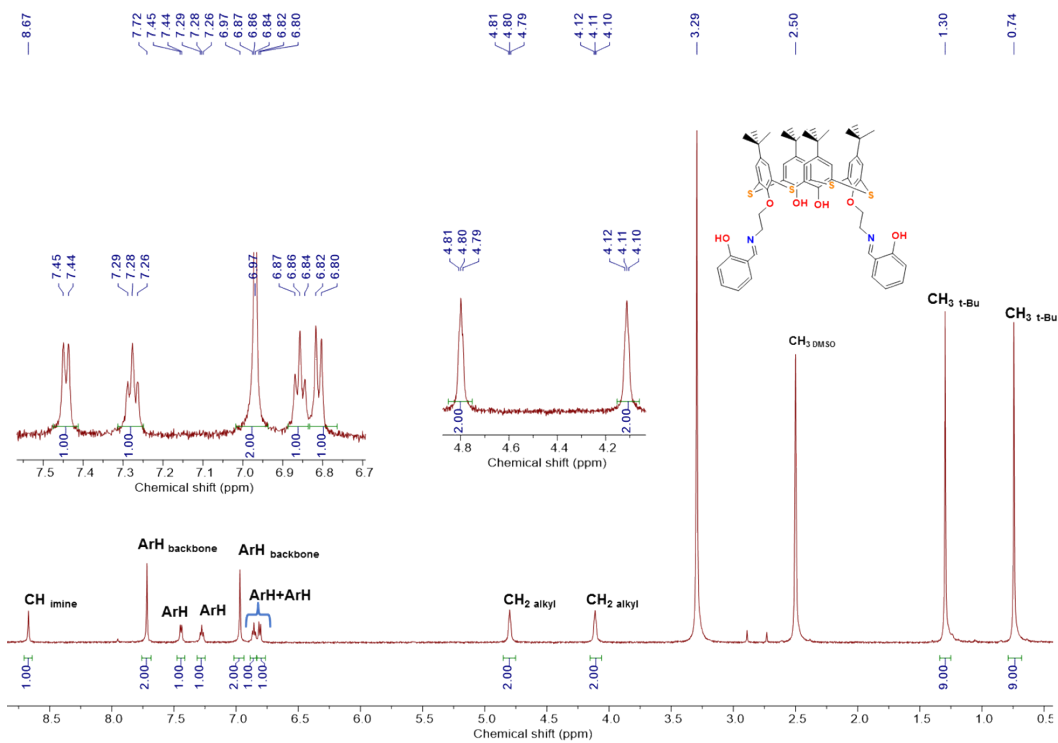

**Figure S2.**  $^1\text{H}$  NMR spectrum for **4** ( $\text{CDCl}_3$ , 400 MHz, 25 °C).

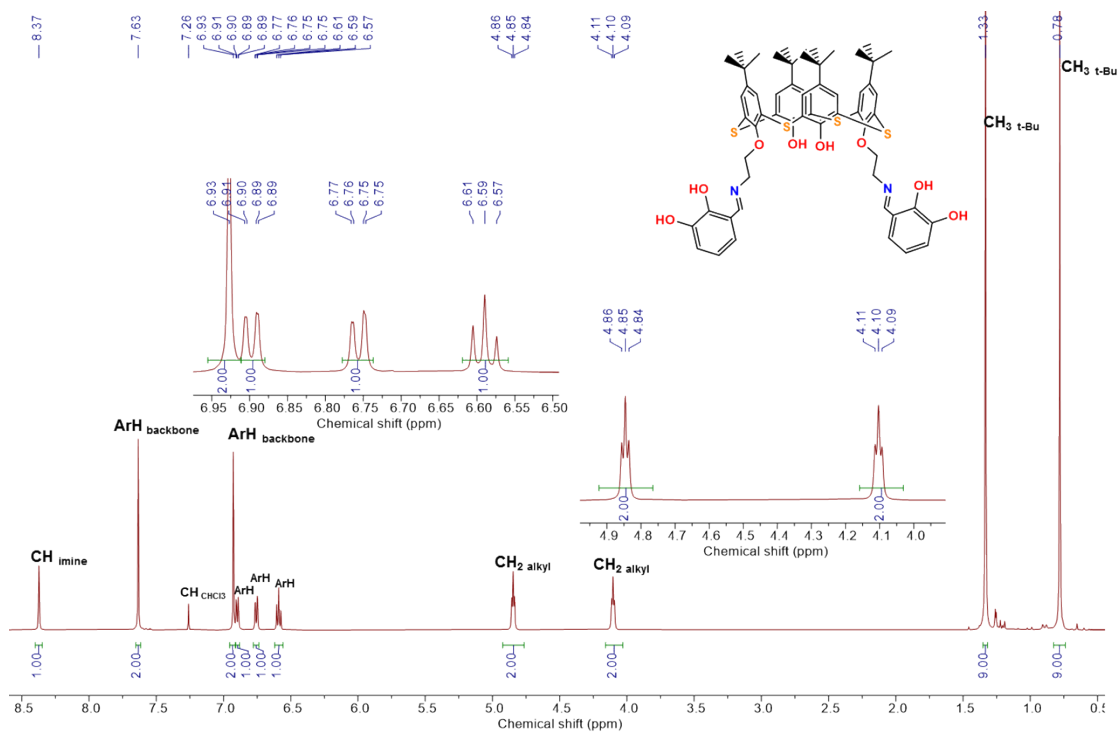

Figure S3.  $^1\text{H}$  NMR spectrum for **6** ( $\text{CDCl}_3$ , 400 MHz, 25  $^\circ\text{C}$ ).

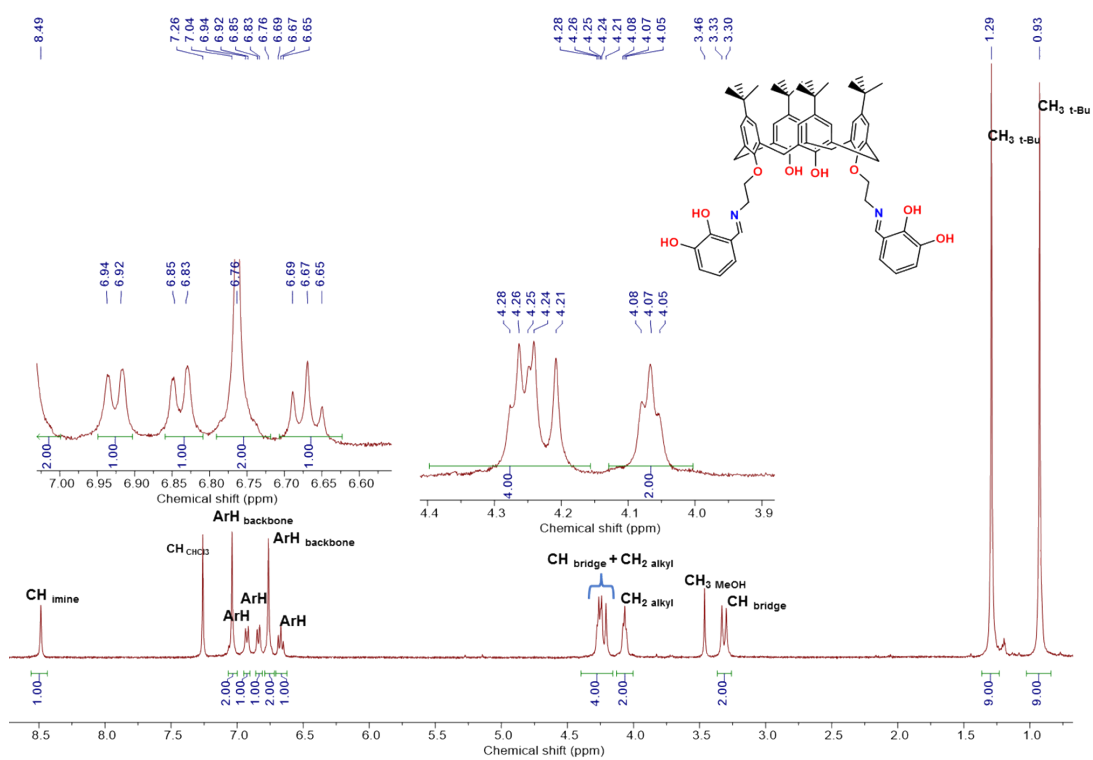

Figure S4.  $^1\text{H}$  NMR spectrum for **5** ( $\text{CDCl}_3$ , 400 MHz, 25  $^\circ\text{C}$ ).

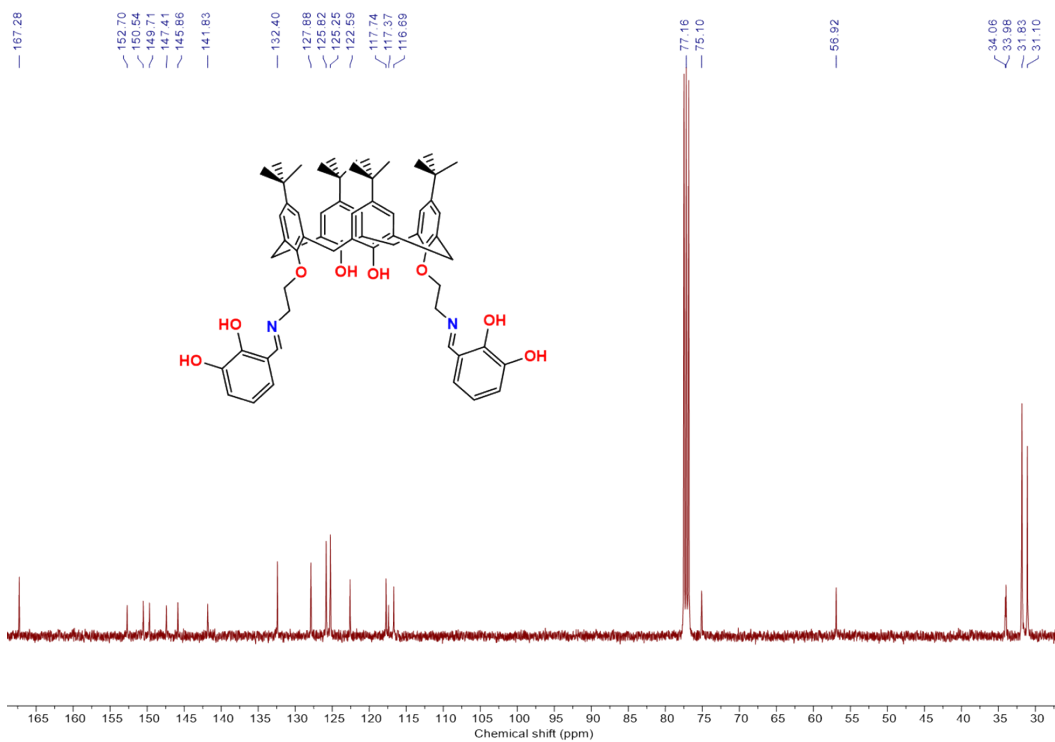

**Figure S5.**  $^{13}\text{C}$  NMR spectrum for **5** ( $\text{CDCl}_3$ , 100 MHz, 25 °C).

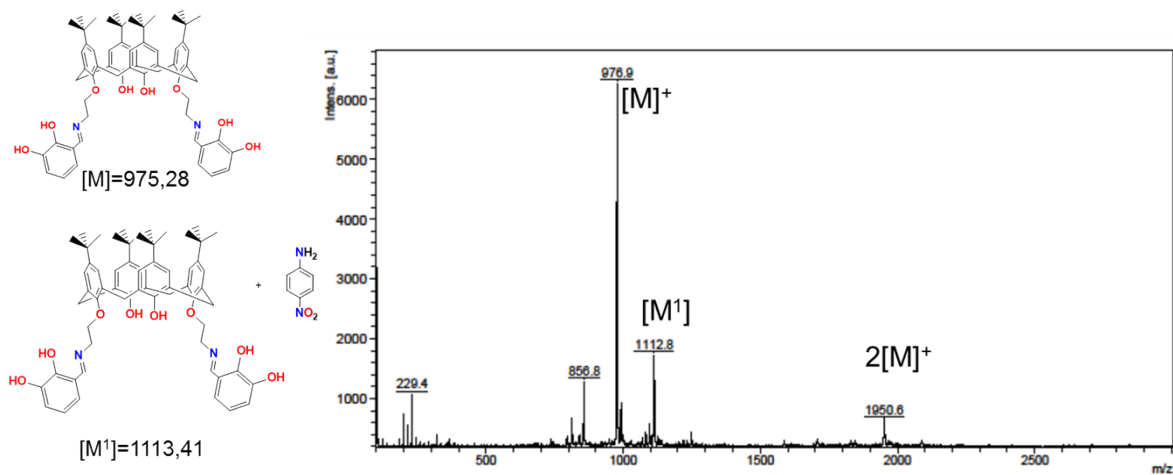

**Figure S6.** MALDI-MS spectrum for **5** (right) and the  $m/z_{\text{teor}}$  calculated for  $[\text{M}]^+$  and  $[\text{M}^1]^+$  ( $\text{M}^1=\text{M}+\text{M}_{\text{PNA}}$ ).

## 2. Single Crystal X-ray diffraction data for 4-6

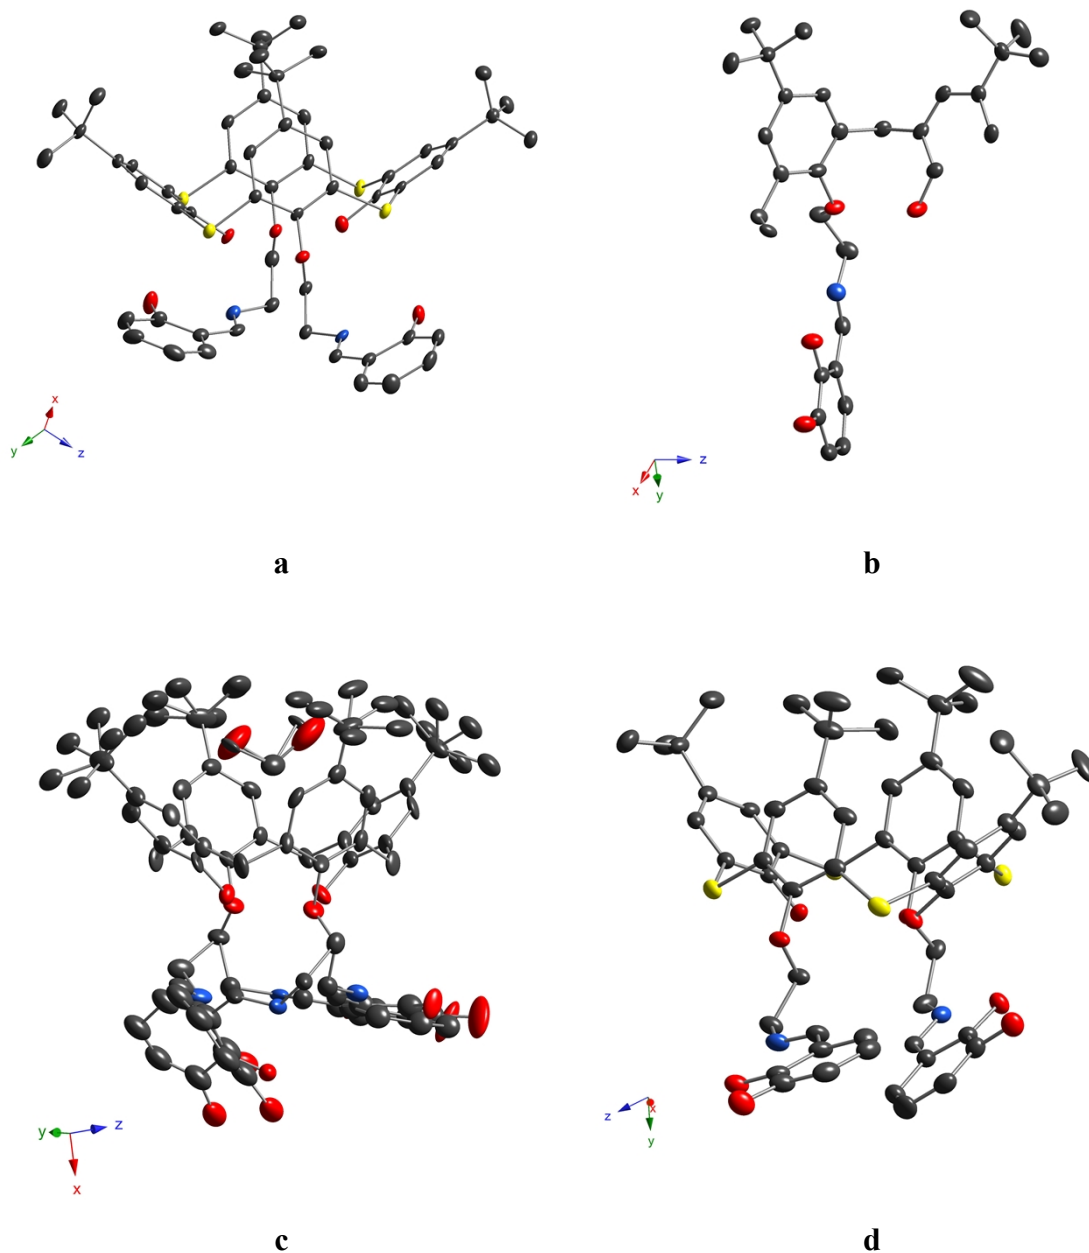

**Figure S7.** ORTEP views for asymmetric parts of **4** (a), **5a** (b), **5b** (c) and **6** (d), showing thermal ellipsoids at the 50% probability level. The C-, O-, N- and S- atoms are represented by dark grey, red, blue and yellow ellipsoids. The H-atoms and solvate molecules are omitted for clarity.

### 3. DFT-optimized geometry of the ligands 4-6

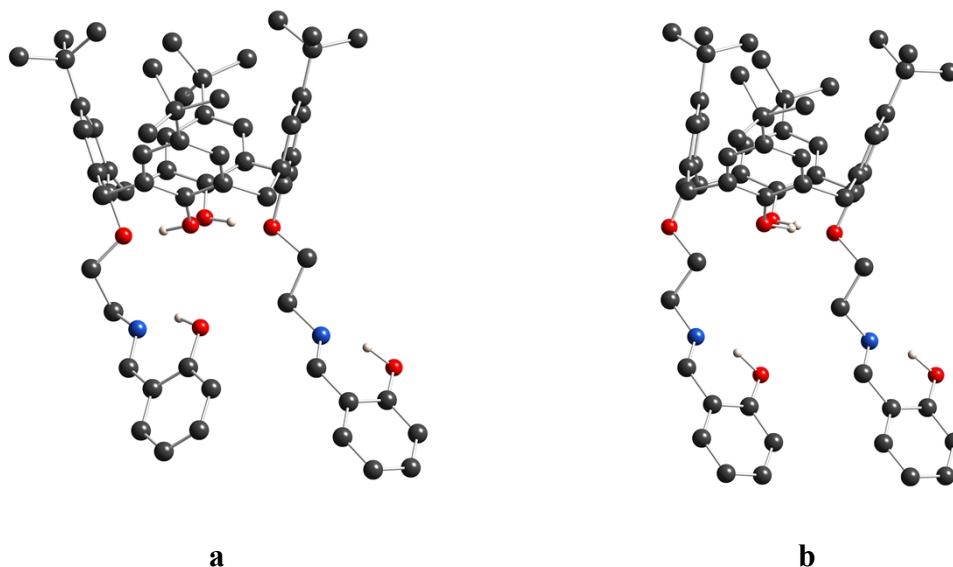

**Figure S8.** For **3**, DFT-optimized geometry of *exo-exo* (a) and *endo-exo* (b) rotamers. The H-, C-, O-, and N- atoms are represented by pale rose, dark grey, red and blue spheres. H-atoms, which are not involved in intramolecular H-bonding, are omitted for clarity.

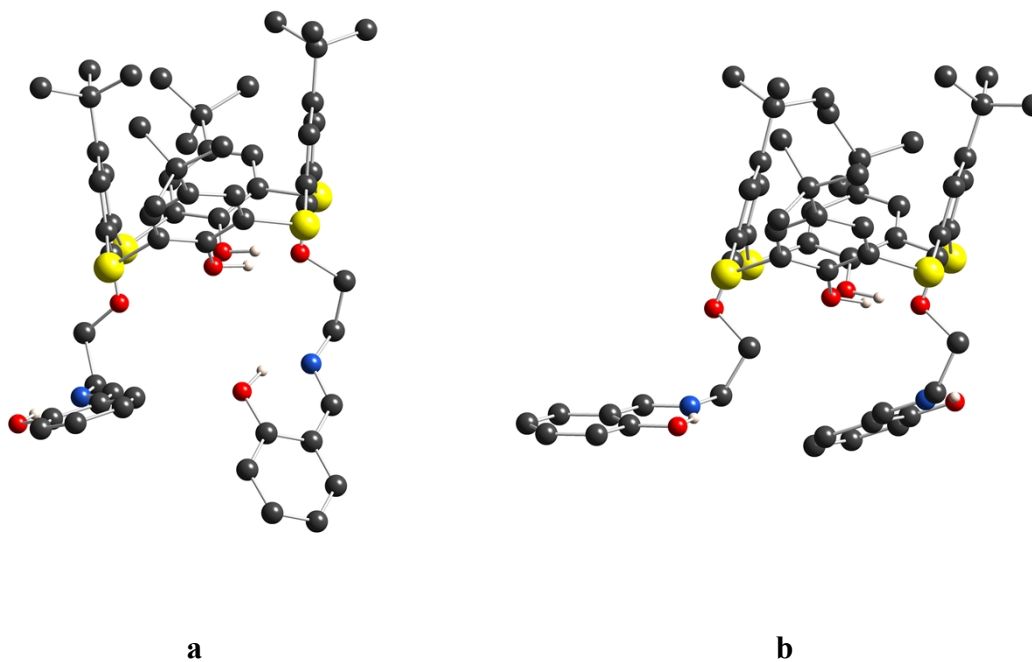

**Figure S9.** For **4**, DFT-optimized geometry of *exo-exo* (a) and *endo-exo* (b) rotamers. The H-, C-, O-, N- and S-atoms are represented by pale rose, dark grey, red, blue and yellow spheres. H-atoms, which are not involved in intramolecular H-bonding, are omitted for clarity.

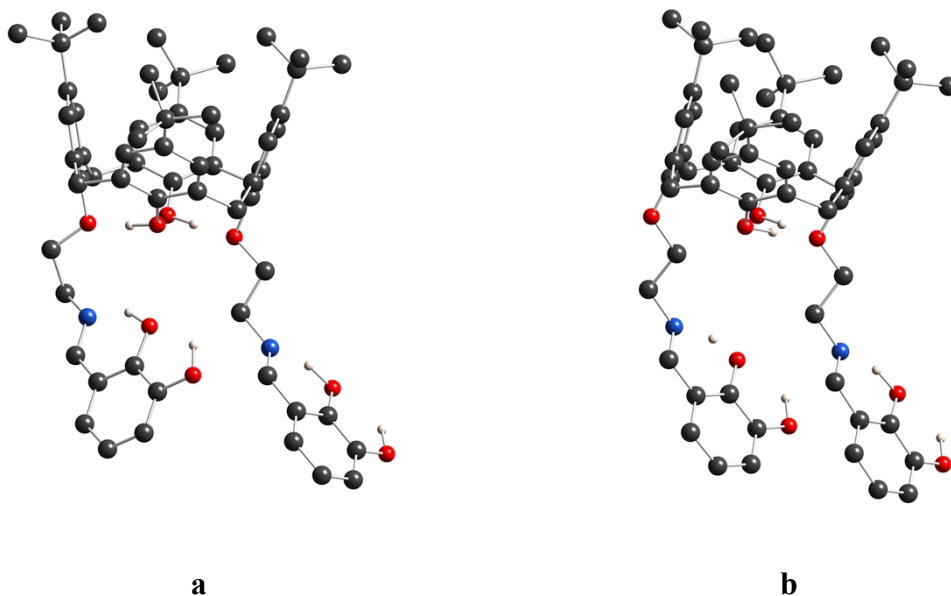

**Figure S10.** For **5**, DFT-optimized geometry of *exo-exo* (a) and *endo-exo* (b) rotamers. The H-, C-, O-, and N- atoms are represented by pale rose, dark grey, red and blue spheres. H-atoms, which are not involved in intramolecular H-bonding, are omitted for clarity.

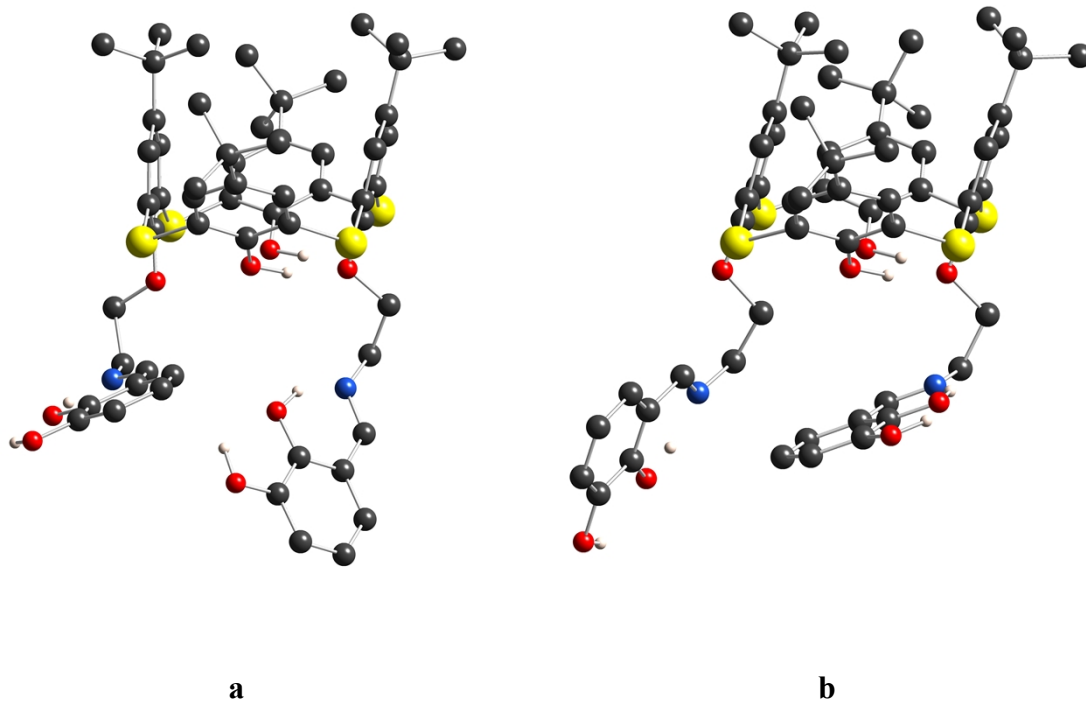

**Figure S11.** For **6**, DFT-optimized geometry of *exo-exo* (a) and *endo-exo* (b) rotamers. The H-, C-, O-, N- and S-atoms are represented by pale rose, dark grey, red, blue and yellow spheres. H-atoms, which are not involved in intramolecular H-bonding, are omitted for clarity.



#### 4. Solid state IR and Raman spectra for 3-6

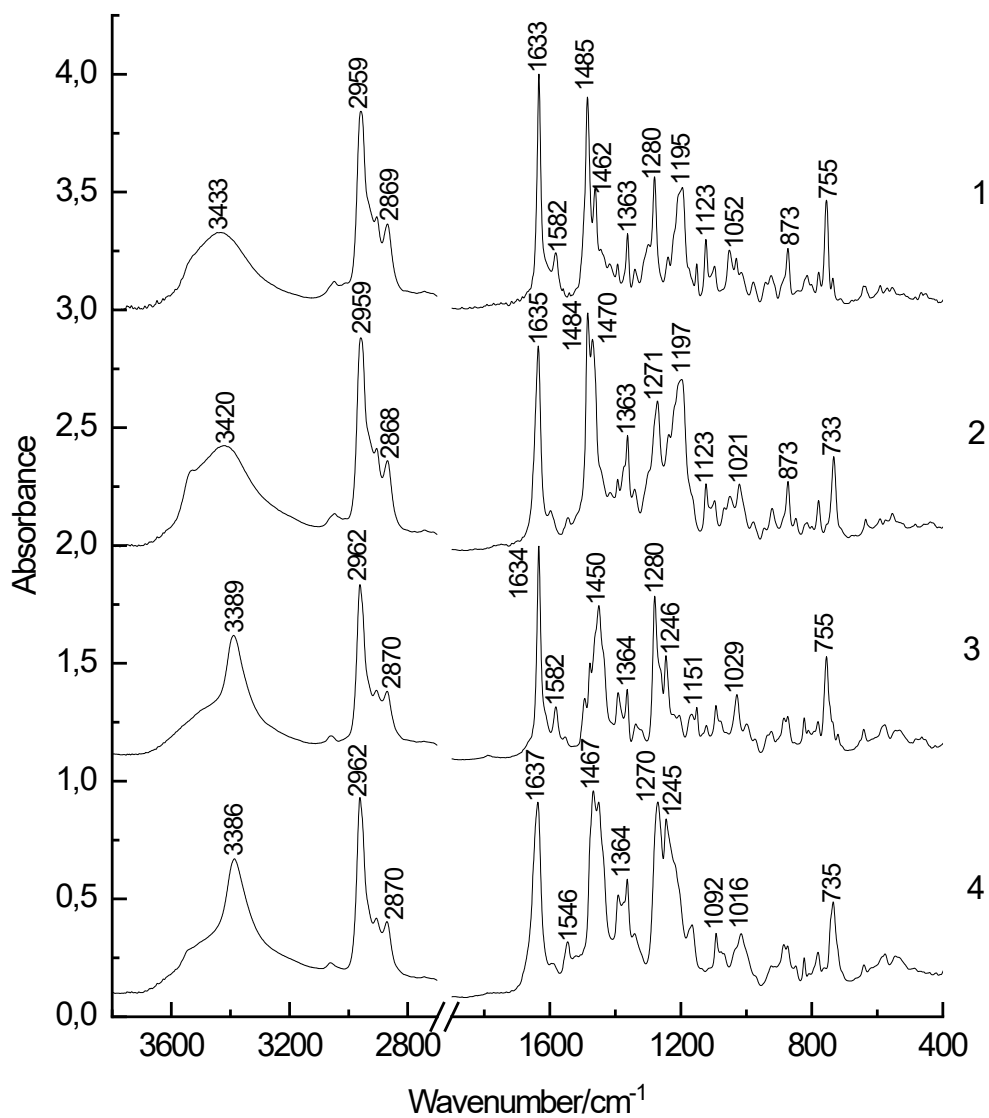

**Figure S12.** Comparison of experimentally obtained IR spectra for crystalline samples of calix[4]arenes **3** (1) and **5** (2), thiocalix[4]arenes **4** (3) and **6** (4).

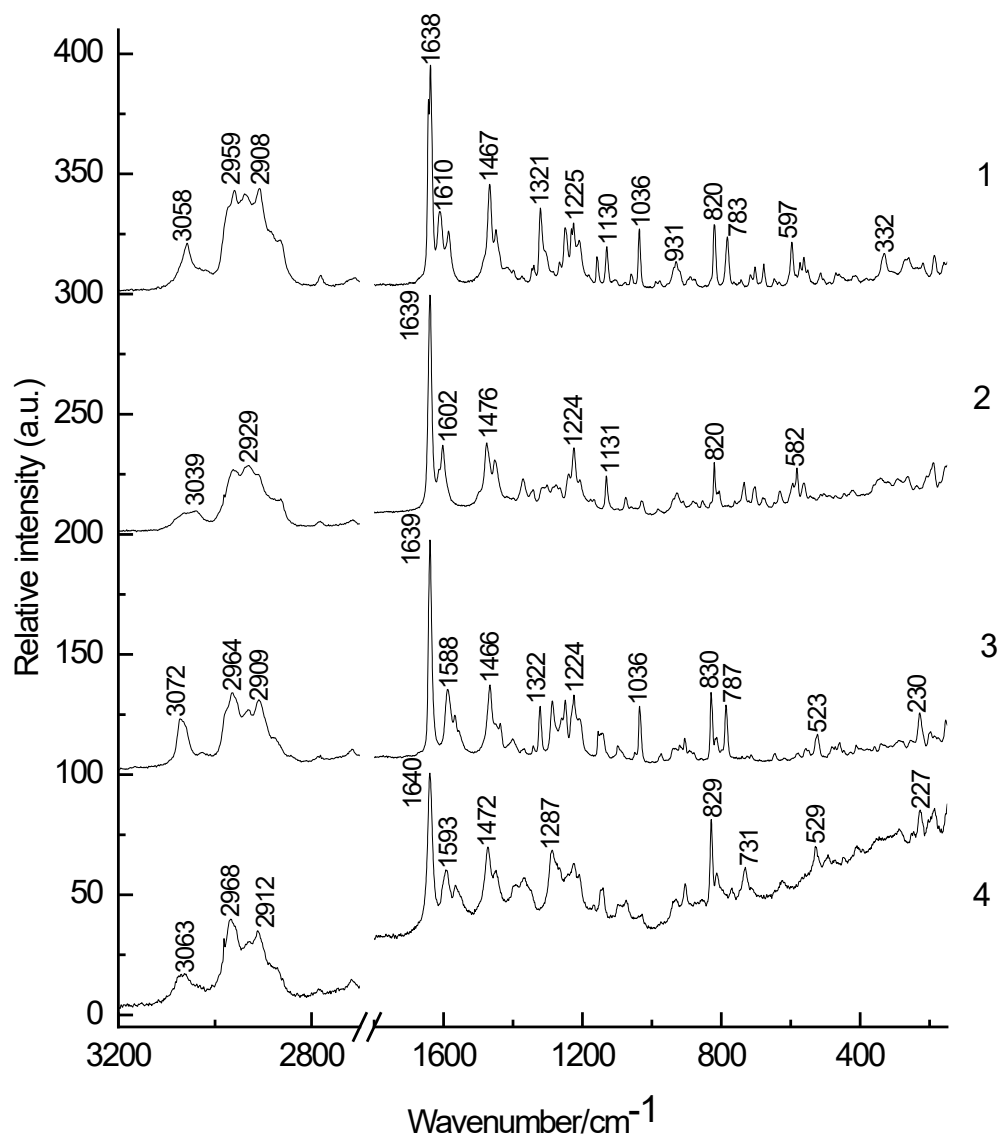

**Figure S13.** Comparison of experimentally obtained Raman spectra for crystalline samples of calix[4]arenes **3** (1) and **5** (2), thiacalix[4]arenes **4** (3) and **6** (4).

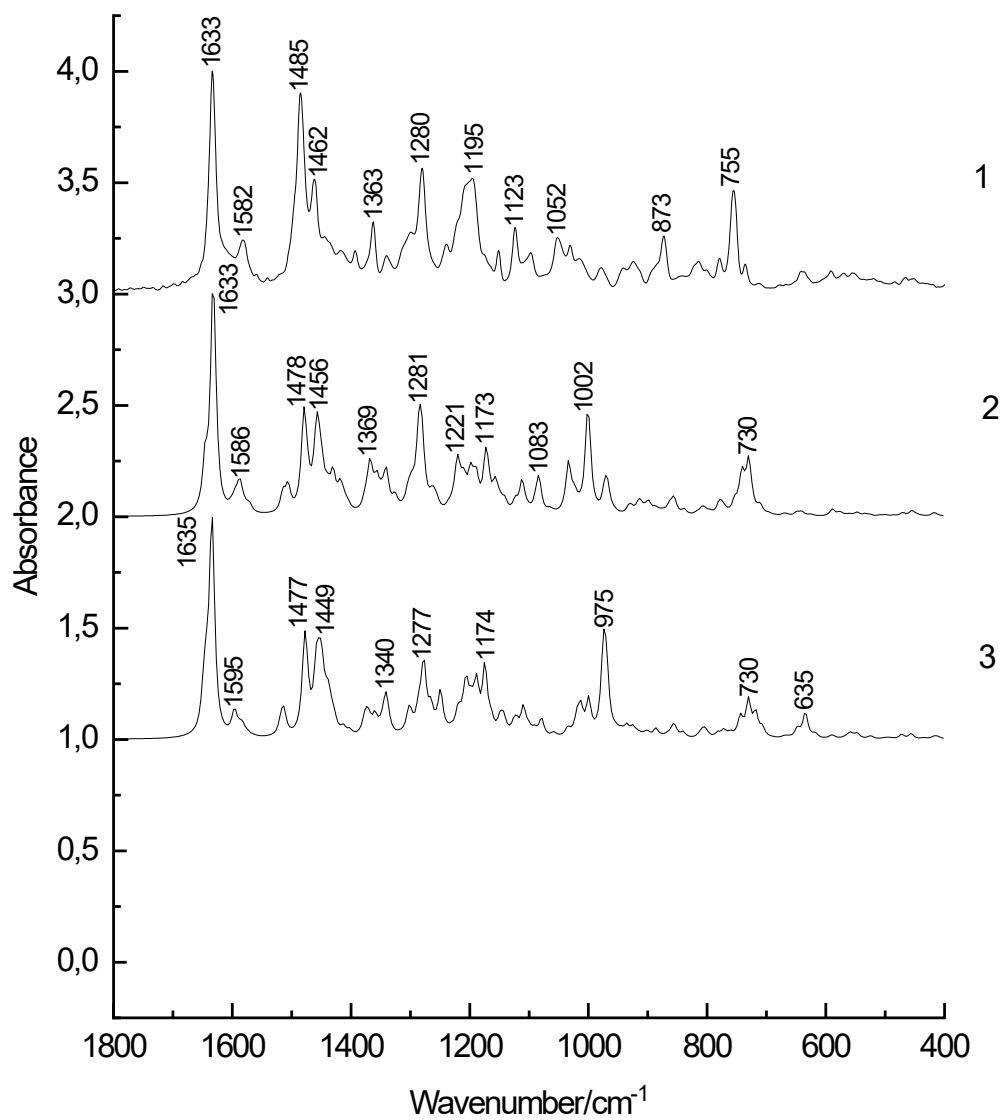

**Figure S14.** For **3**, comparison of experimentally obtained (1) and theoretically calculated IR spectra of *exo-exo* (2) and *endo-exo* (3) rotamers.

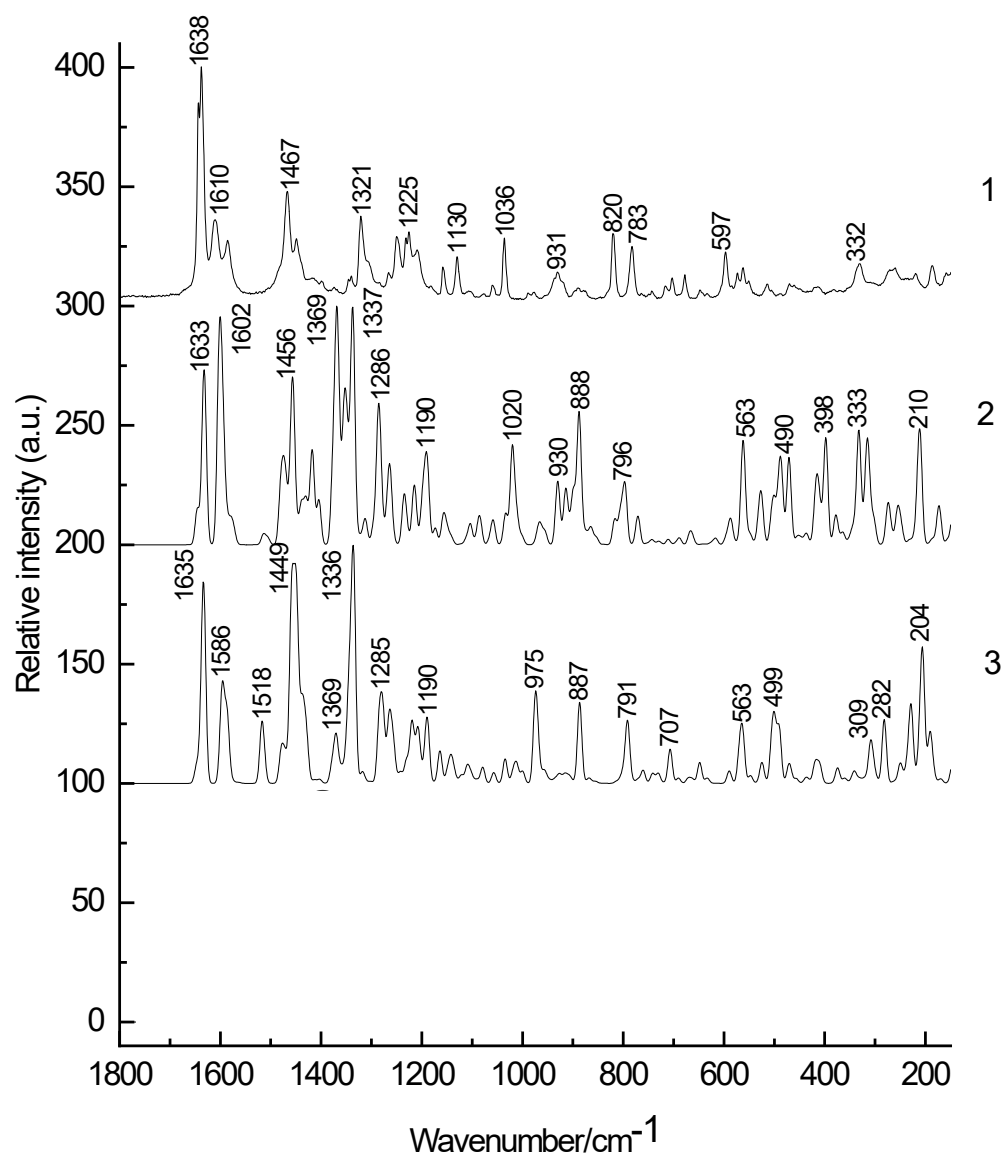

**Figure S15.** For **3**, comparison of experimentally obtained (1) and theoretically calculated Raman spectra of *exo-exo* (2) and *endo-exo* (3) rotamers.

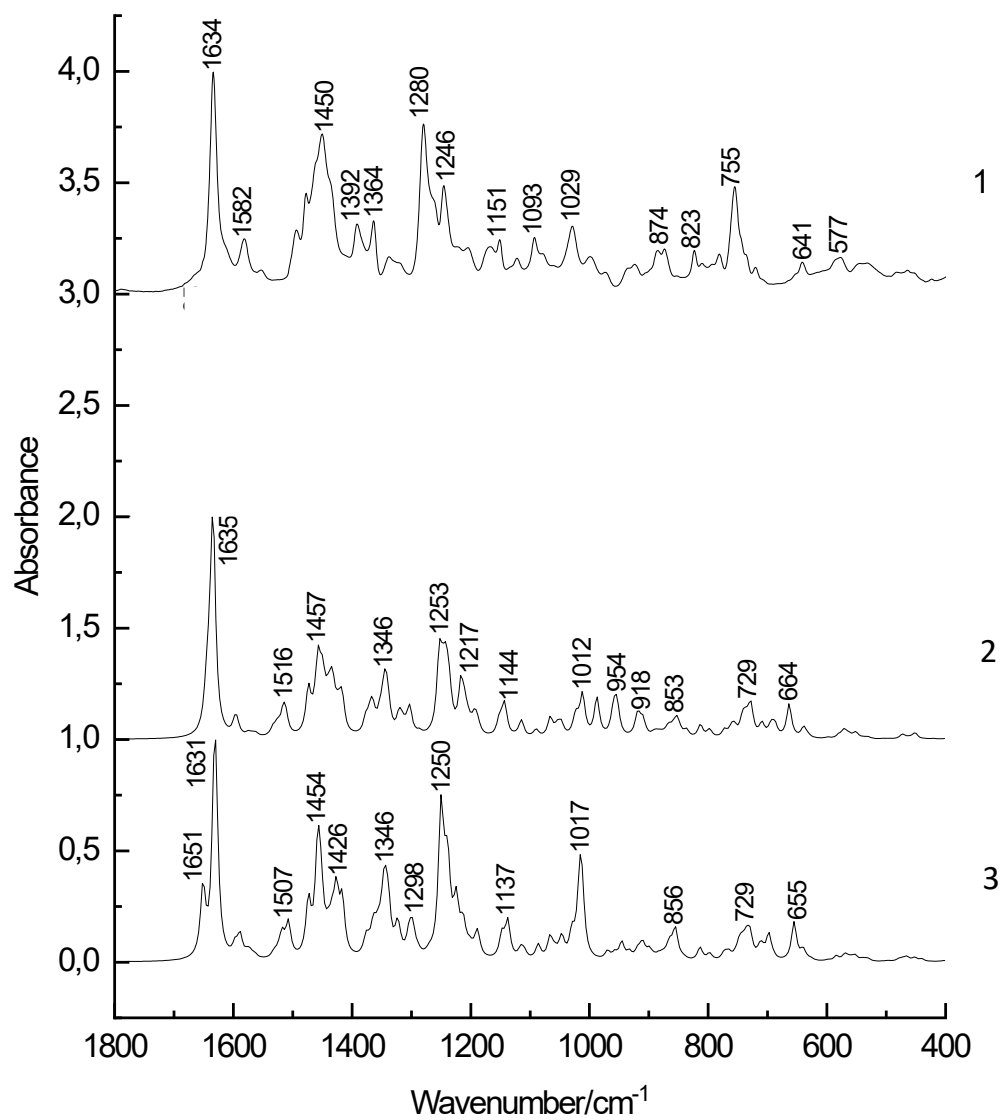

**Figure S16.** For **4**, comparison of experimentally obtained (1) and theoretically calculated IR spectra of *endo-exo* (2) and *exo-exo* (3) rotamers.

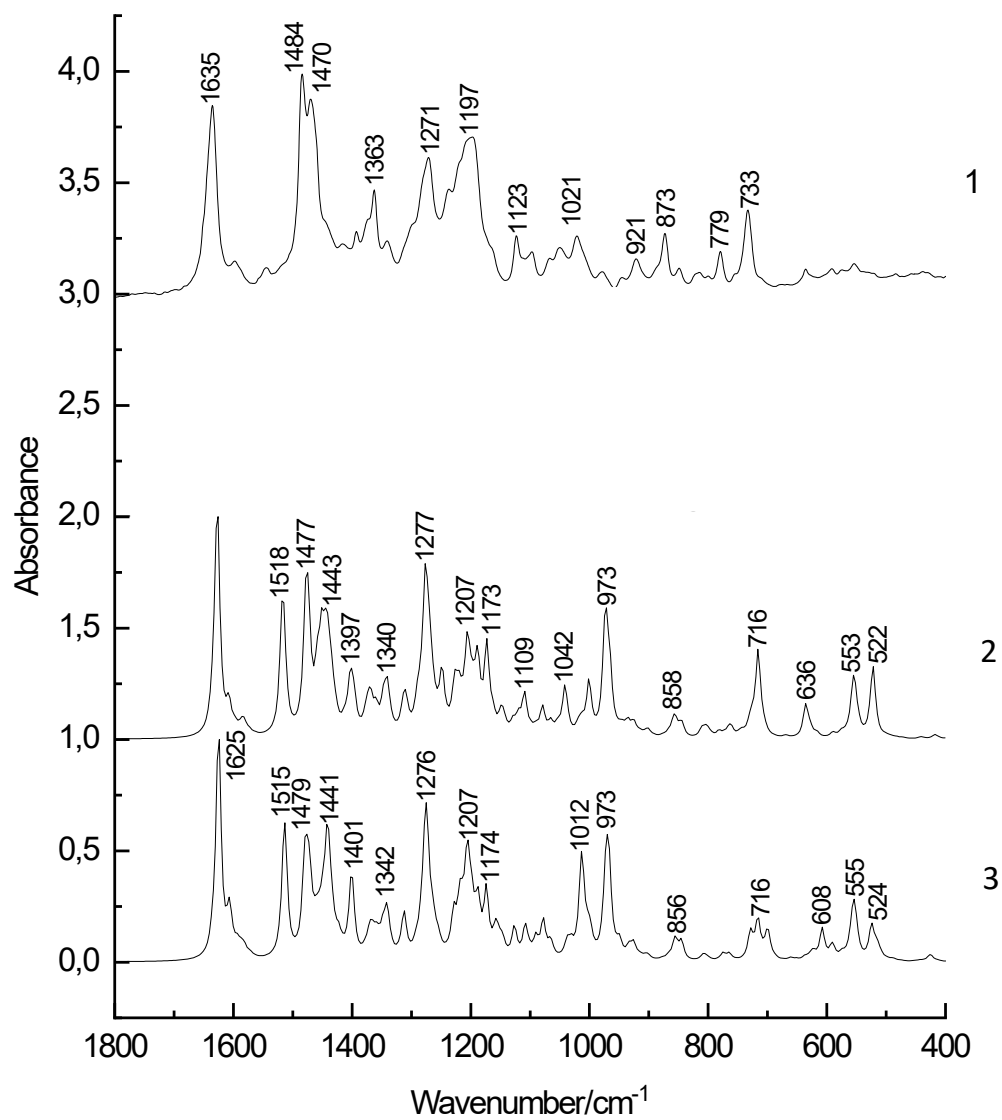

**Figure S17.** For **4**, comparison of experimentally obtained (1) and theoretically calculated Raman spectra of *endo-exo* (2) and *exo-exo* (3) rotamers.

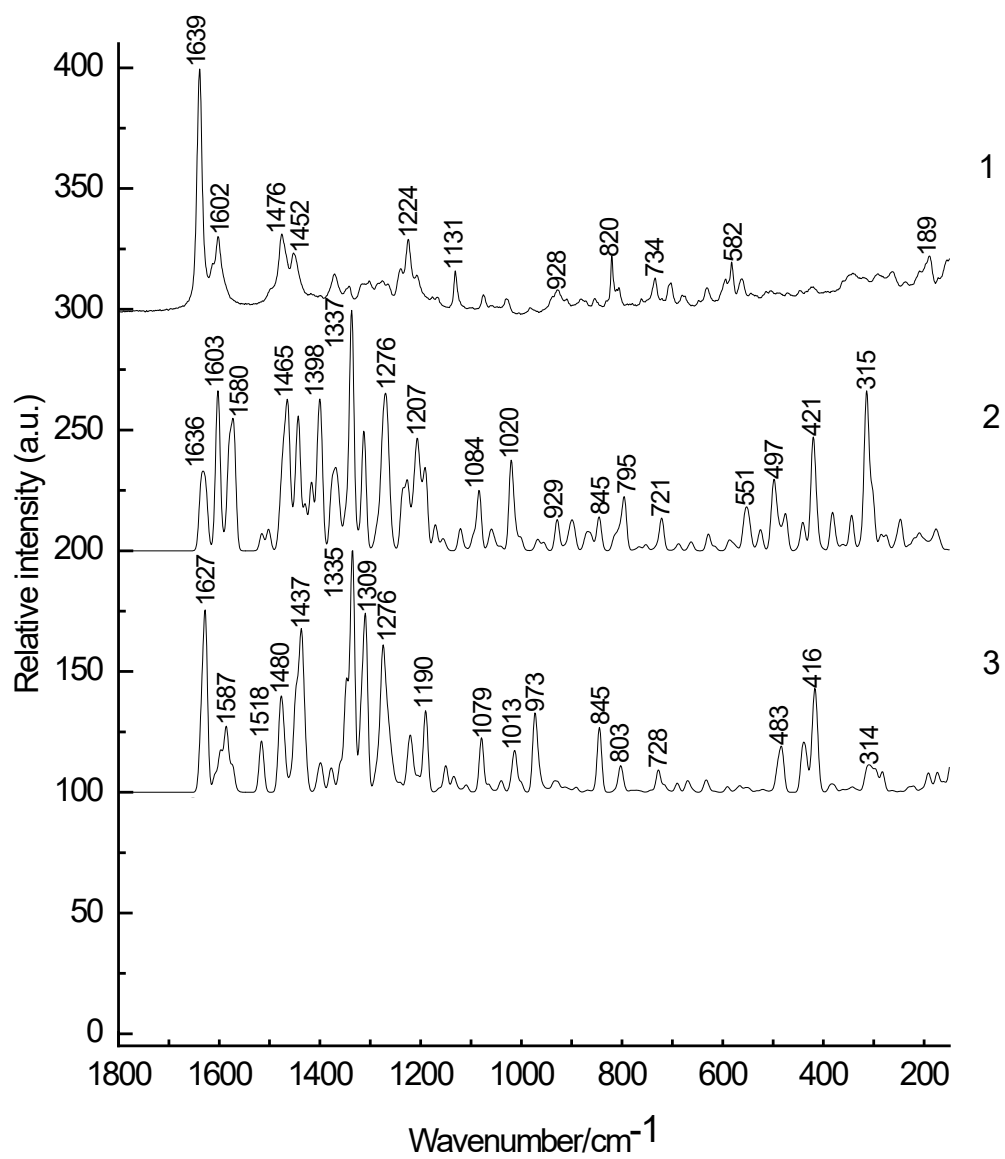

**Figure S18.** For **5**, comparison of experimentally obtained (1) and theoretically calculated IR spectra of *exo-exo* (2) and *endo-exo* (3) rotamers.

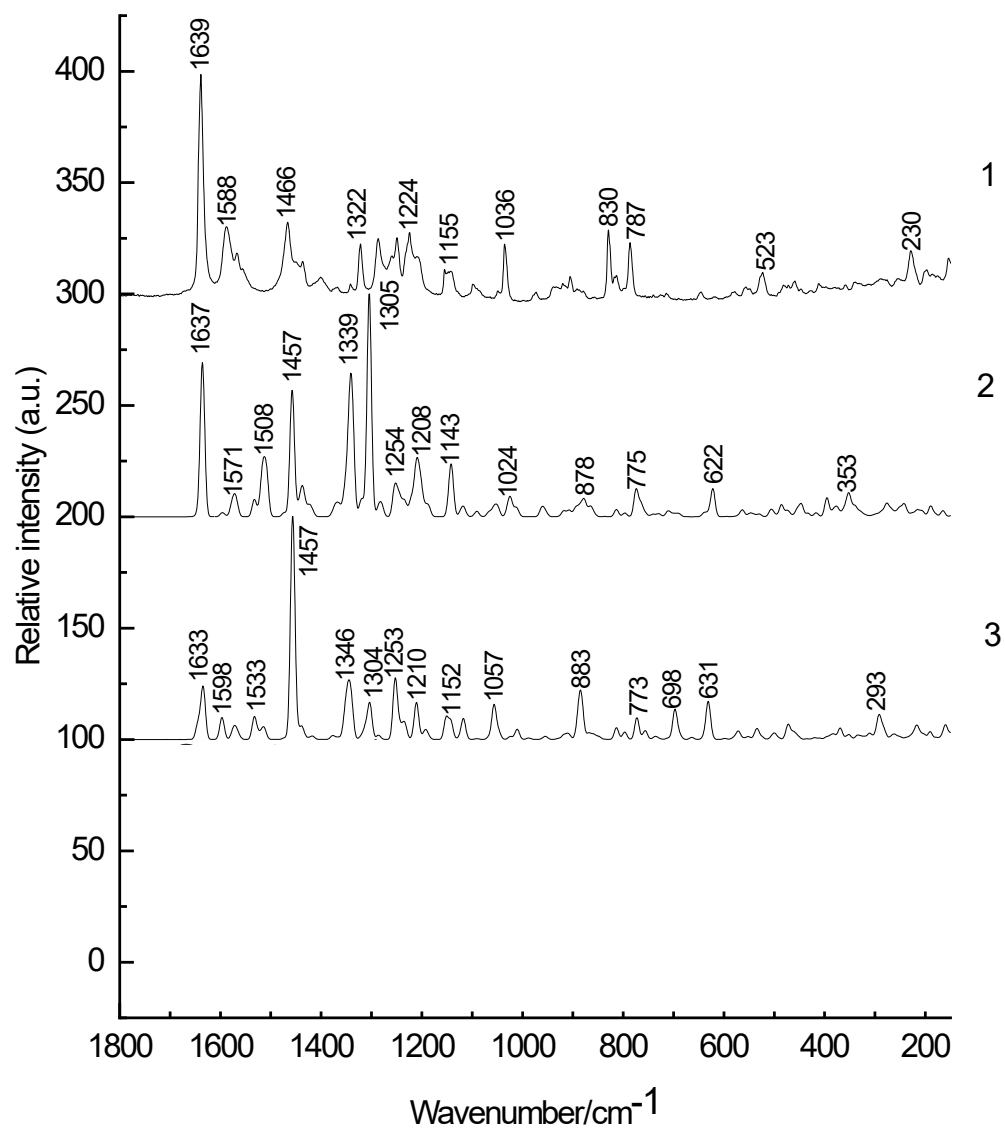

**Figure S19.** For **5**, comparison of experimentally obtained (1) and theoretically calculated Raman spectra of *exo-exo* (2) and *endo-exo* (3) rotamers.



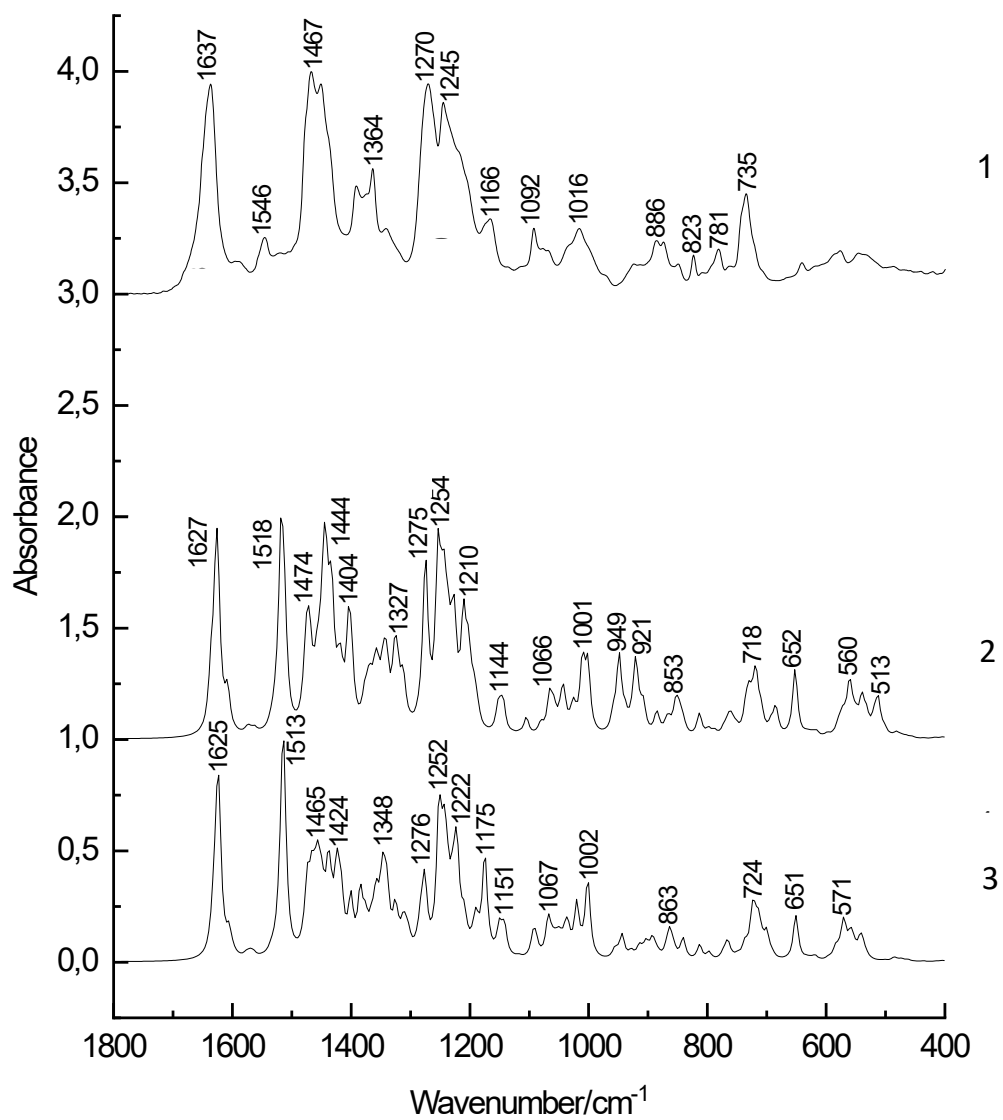

**Figure S20.** For **6**, comparison of experimentally obtained (1) and theoretically calculated IR spectra of *endo-exo* (2) and *exo-exo* (3) rotamers.

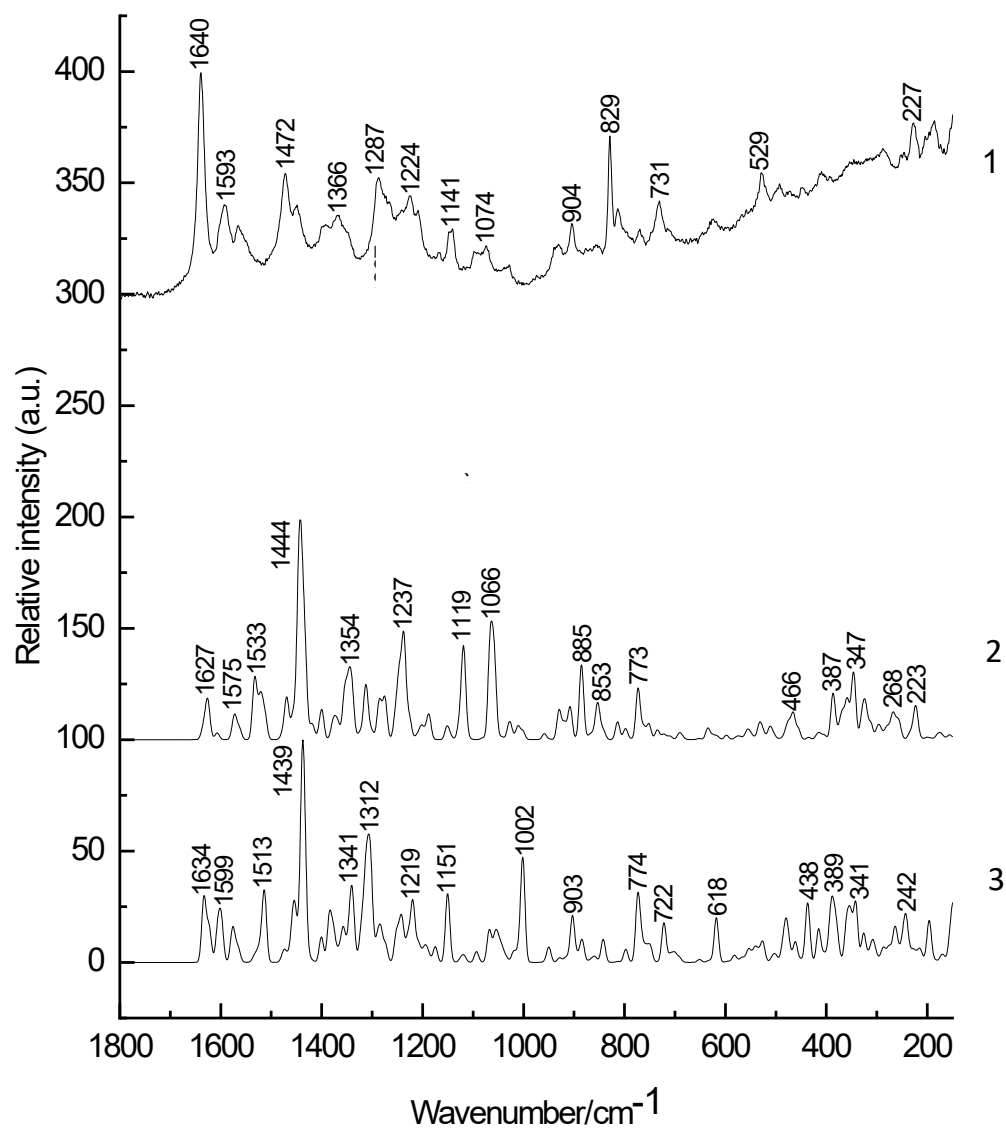

**Figure S21.** For **6**, comparison of experimentally obtained (1) and theoretically calculated Raman spectra of *exo-exo* (2) and *endo-exo* (3) rotamers.

## 5. DLS study

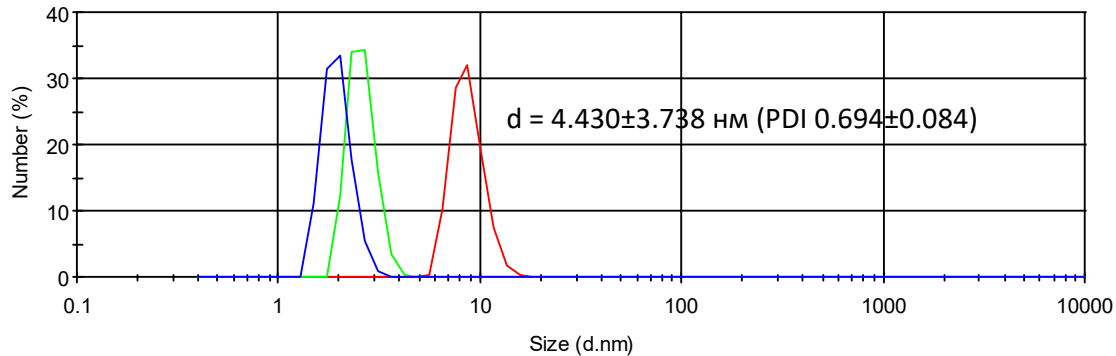

**a**

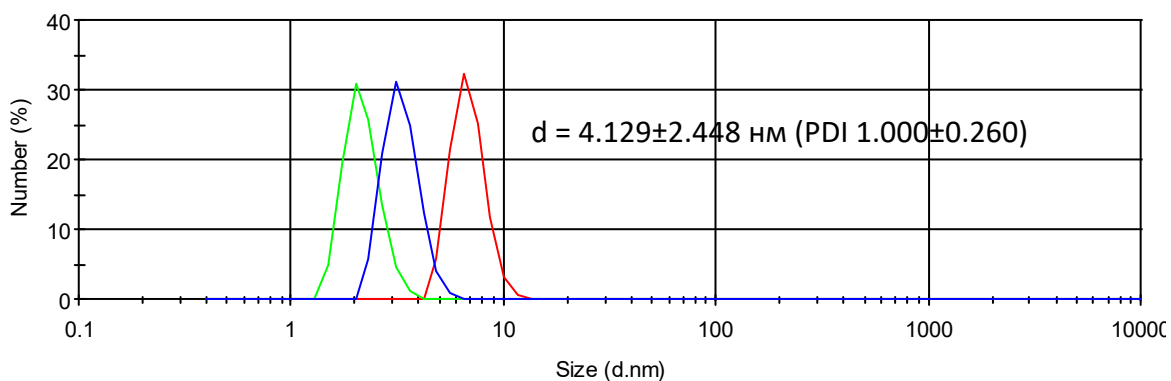

**b**

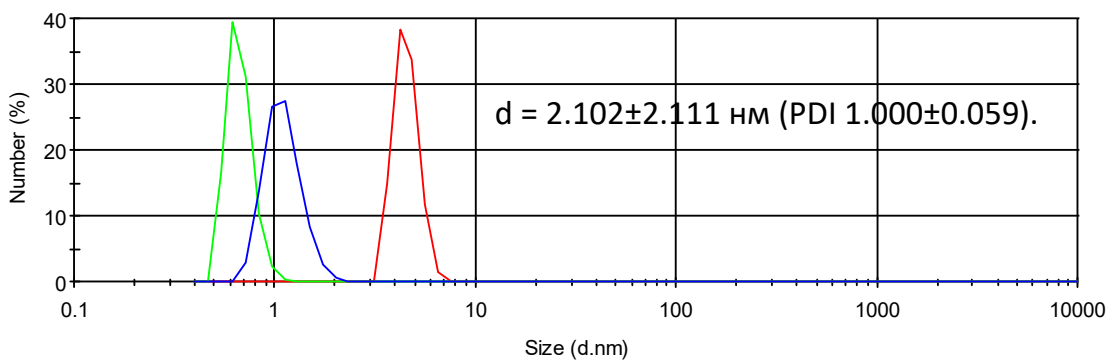

**c**

**Figure S21.** DLS spectra, obtained by three consecutive measurements of the  $\text{CH}_2\text{Cl}_2$  solutions ( $C = 4 \times 10^{-3}\text{M}$ ,  $25^\circ\text{C}$ ) of **3** (a), **4** (b) and **5** (c), showing the average hydrodynamic diameter ( $d$ , nm) of forming aggregates and polydispersity index (PDI).

## 6. Structural characteristics for ligands 3-6

**Table S1.** For **3-6**, a comparison of experimental and theoretical dihedral angles ( $^\circ$ ) of *exo-exo* and *endo-exo* rotamers.

| System   | Dihedral angles            | Exp.   | <i>exo-exo</i> | <i>endo-exo</i> |
|----------|----------------------------|--------|----------------|-----------------|
| <b>3</b> | C(4)–C(3)–C(40)–C(43)      | -80.6  | -79.0          | -79.8           |
|          | C(3)–C(40)–C(43)–C(49)     | 83.0   | 104.6          | 103.8           |
|          | C(46)–C(45)–C(64)–C(67)    | -79.0  | -95.7          | -104.5          |
|          | C(45)–C(64)–C(67)–C(73)    | 80.0   | 67.0           | 53.1            |
|          | C(70)–C(69)–C(106)–C(109)  | -84.5  | -77.9          | -54.5           |
|          | C(69)–C(106)–C(109)–C(115) | 87.4   | 105.9          | 106.3           |
|          | C(112)–C(111)–C(130)–C(1)  | -83.1  | -96.9          | -104.1          |
|          | C(111)–C(130)–C(1)–C(7)    | 76.7   | 67.4           | 78.9            |
| <b>4</b> | C(14)–C(15)–S(16)–C(27)    | -78.6  | -102.3         | -80.1           |
|          | C(15)–S(16)–C(27)–C(26)    | 107.3  | 60.5           | 112.2           |
|          | C(6)–C(7)–S(25)–C(8)       | -108.6 | -61.3          | -113.8          |
|          | C(7)–S(25)–C(8)–C(9)       | 42.9   | 104.1          | 46.5            |
|          | C(11)–C(12)–S(29)–C(32)    | -47.3  | -104.5         | -47.5           |
|          | C(12)–S(29)–C(32)–C(31)    | 121.8  | 76.5           | 116.1           |
|          | C(19)–C(24)–S(23)–C(22)    | -115.5 | -76.9          | -112.1          |
|          | C(24)–S(23)–C(22)–C(17)    | 77.8   | 103.8          | 79.2            |
| <b>5</b> | C(4)–C(3)–C(40)–C(43)      | -80.6  | -77.8          | -79.8           |
|          | C(3)–C(40)–C(43)–C(49)     | 83.0   | 105.2          | 103.6           |
|          | C(46)–C(45)–C(64)–C(67)    | -79.0  | -96.5          | -104.4          |
|          | C(45)–C(64)–C(67)–C(73)    | 80.0   | 66.2           | 53.0            |
|          | C(70)–C(69)–C(106)–C(109)  | -84.5  | -77.2          | -54.3           |
|          | C(69)–C(106)–C(109)–C(115) | 87.4   | 106.7          | 106.0           |
|          | C(112)–C(111)–C(130)–C(1)  | -83.1  | -97.6          | -104.0          |
|          | C(111)–C(130)–C(1)–C(7)    | 76.7   | 66.3           | 79.0            |
| <b>6</b> | C(11)–C(12)–S(29)–C(32)    | -78.4  | -62.8          | -79.9           |
|          | C(12)–S(29)–C(32)–C(31)    | 98.1   | 115.7          | 112.2           |
|          | C(19)–C(24)–S(23)–C(22)    | -103.0 | -108.5         | -115.0          |
|          | C(24)–S(23)–C(22)–C(17)    | 41.9   | 74.0           | 47.6            |
|          | C(14)–C(15)–S(16)–C(27)    | -41.1  | -80.4          | -48.6           |
|          | C(15)–S(16)–C(27)–C(26)    | 107.0  | 113.6          | 115.0           |
|          | C(6)–C(7)–S(25)–C(8)       | -107.6 | -112.3         | -111.8          |
|          | C(7)–S(25)–C(8)–C(9)       | 81.5   | 57.9           | 78.8            |

**Table S2.** For **3-6**, a comparison of experimental and theoretical bond distances (Å) and bond angles (°) of *exo-exo* and *endo-exo* rotamers.

| Compound name             | Exp.  | <i>exo-exo</i> | <i>endo-exo</i> |
|---------------------------|-------|----------------|-----------------|
| <b>3</b>                  |       |                |                 |
| <i>Bond distances</i>     |       |                |                 |
| C(2)–O(135)               | 1.389 | 1.399          | 1.389           |
| C(22)–C(25)               | 1.495 | 1.530          | 1.530           |
| C(22)–O(135)              | 1.435 | 1.441          | 1.439           |
| C(25)–N(133)              | 1.445 | 1.452          | 1.452           |
| C(28)–C(30)               | 1.417 | 1.448          | 1.450           |
| C(28)–N(133)              | 1.281 | 1.292          | 1.290           |
| C(30)–C(39)               | 1.355 | 1.429          | 1.430           |
| C(39)–O(136)              | 1.410 | 1.336          | 1.338           |
| C(44)–O(138)              | 1.376 | 1.356          | 1.361           |
| C(67)–C(73)               | 1.393 | 1.403          | 1.403           |
| C(64)–C(67)               | 1.521 | 1.524          | 1.523           |
| C(72)–C(75)               | 1.527 | 1.538          | 1.538           |
| C(75)–C(84)               | 1.503 | 1.546          | 1.539           |
| <i>Angles</i>             |       |                |                 |
| C(2)–O(135)–C(22)         | 112.7 | 115.6          | 120.9           |
| C(4)–C(6)–C(7)            | 117.5 | 123.0          | 117.5           |
| C(22)–C(25)–N(133)        | 110.3 | 110.0          | 109.3           |
| C(25)–C(22)–O(135)        | 107.5 | 106.7          | 106.2           |
| C(25)–N(133)–C(28)        | 118.5 | 118.9          | 120.2           |
| C(28)–C(30)–C(31)         | 121.4 | 120.5          | 120.8           |
| C(30)–C(28)–N(133)        | 123.8 | 121.7          | 121.4           |
| C(30)–C(39)–O(136)        | 121.8 | 121.5          | 121.4           |
| C(43)–C(49)–C(48)         | 122.7 | 109.5          | 122.6           |
| C(45)–C(44)–O(138)        | 117.8 | 116.6          | 116.5           |
| C(49)–C(48)–C(51)         | 121.8 | 123.2          | 123.1           |
| <i>Dihedral angles</i>    |       |                |                 |
| C(2)–O(135)–C(22)–C(25)   | 176.7 | 175.9          | 172.9           |
| C(3)–C(2)–O(135)–C(22)    | 93.0  | 97.5           | 94.4            |
| C(22)–C(25)–N(133)–C(28)  | 119.1 | 126.0          | 125.0           |
| C(25)–N(133)–C(28)–C(30)  | 178.0 | 179.6          | 178.8           |
| C(31)–C(30)–C(28)–N(133)  | 179.8 | 179.6          | 178.9           |
| C(43)–C(49)–C(48)–C(51)   | 175.9 | 178.9          | 178.8           |
| C(45)–C(64)–C(67)–C(68)   | 93.1  | 109.6          | 123.2           |
| C(46)–C(45)–C(64)–C(67)   | 79.0  | 95.7           | 104.5           |
| C(49)–C(43)–C(44)–O(138)  | 178.0 | 176.7          | 176.4           |
| C(49)–C(48)–C(51)–C(60)   | 118.4 | 119.6          | 119.6           |
| N(133)–C(25)–C(22)–O(135) | 172.6 | 178.5          | 179.1           |
| <b>4</b>                  |       |                |                 |
| <i>Bond distances</i>     |       |                |                 |
| C(3)–O(20)                | 1.380 | 1.540          | 1.373           |
| C(5)–C(34)                | 1.533 | 1.540          | 1.537           |
| C(6)–C(7)                 | 1.388 | 1.404          | 1.395           |
| C(7)–S(25)                | 1.779 | 1.430          | 1.796           |
| O(20)–C(49)               | 1.435 | 1.409          | 1.448           |
| C(34)–C(40)               | 1.530 | 1.397          | 1.539           |
| C(49)–C(101)              | 1.500 | 1.512          | 1.523           |
| C(101)–N(104)             | 1.464 | 1.528          | 1.451           |

|               |       |       |       |
|---------------|-------|-------|-------|
| N(104)–C(106) | 1.272 | 1.402 | 1.290 |
| C(106)–C(110) | 1.461 | 1.512 | 1.449 |
| C(110)–C(112) | 1.392 | 1.512 | 1.408 |
| O(108)–C(109) | 1.345 | 1.512 | 1.335 |

*Angles*

|                      |       |       |       |
|----------------------|-------|-------|-------|
| O(2)–C(18)–C(7)      | 117.9 | 115.9 | 120.2 |
| C(3)–O(20)–C(49)     | 116.3 | 108.1 | 116.2 |
| C(5)–C(6)–C(7)       | 122.4 | 117.8 | 122.8 |
| C(5)–C(34)–C(40)     | 112.0 | 117.4 | 112.1 |
| C(6)–C(5)–C(34)      | 120.1 | 123.2 | 120.1 |
| O(20)–C(49)–C(101)   | 106.0 | 119.0 | 106.9 |
| C(49)–C(101)–N(104)  | 111.2 | 119.1 | 112.1 |
| C(101)–N(104)–C(106) | 118.7 | 113.9 | 119.4 |
| N(104)–C(106)–C(110) | 122.6 | 122.5 | 112.1 |
| C(106)–C(110)–C(112) | 120.7 | 113.3 | 120.6 |
| O(108)–C(109)–C(110) | 122.0 | 126.0 | 121.6 |

*Dihedral angles*

|                             |       |       |       |
|-----------------------------|-------|-------|-------|
| C(3)–C(8)–S(25)–C(7)        | 130.6 | 179.7 | 130.9 |
| C(3)–O(20)–C(49)–C(101)     | 173.1 | 121.2 | 178.5 |
| C(6)–C(5)–C(34)–C(40)       | 171.3 | 0.7   | 179.5 |
| C(6)–C(7)–S(25)–C(8)        | 121.8 | 179.7 | 116.1 |
| C(7)–C(6)–C(5)–C(34)        | 179.8 | 87.9  | 179.5 |
| C(8)–C(3)–O(20)–C(49)       | 85.6  | 106.0 | 92.4  |
| C(49)–C(101)–N(104)–C(106)  | 141.4 | 104.5 | 113.6 |
| O(108)–C(109)–C(110)–C(112) | 179.0 | 176.7 | 180.0 |
| O(20)–C(49)–C(101)–N(104)   | 59.0  | 117.8 | 69.2  |
| N(104)–C(106)–C(110)–C(112) | 177.9 | 62.0  | 179.4 |

5

*Bond distances*

|               |       |       |       |
|---------------|-------|-------|-------|
| C(2)–O(135)   | 1.378 | 1.400 | 1.388 |
| C(3)–C(40)    | 1.498 | 1.523 | 1.523 |
| C(22)–O(135)  | 1.452 | 1.441 | 1.443 |
| C(25)–N(133)  | 1.395 | 1.453 | 1.452 |
| C(28)–C(30)   | 1.396 | 1.447 | 1.451 |
| C(28)–N(133)  | 1.286 | 1.295 | 1.289 |
| C(30)–C(31)   | 1.421 | 1.414 | 1.413 |
| C(37)–O(38)   | 1.359 | 1.362 | 1.364 |
| C(72)–C(75)   | 1.527 | 1.538 | 1.539 |
| C(75)–C(76)   | 1.567 | 1.547 | 1.546 |
| C(44)–O(138)  | 1.360 | 1.357 | 1.366 |
| C(112)–C(114) | 1.420 | 1.401 | 1.405 |

*Angles*

|                    |       |       |       |
|--------------------|-------|-------|-------|
| C(2)–O(135)–C(22)  | 124.2 | 115.1 | 120.2 |
| C(22)–C(25)–N(133) | 111.3 | 109.7 | 112.4 |
| C(25)–C(22)–O(135) | 114.7 | 107.2 | 107.6 |

|                    |       |       |       |
|--------------------|-------|-------|-------|
| C(25)–N(133)–C(28) | 132.7 | 119.2 | 119.5 |
| C(28)–C(30)–C(31)  | 117.6 | 121.5 | 120.4 |
| C(30)–C(28)–N(133) | 129.3 | 121.2 | 121.7 |
| C(30)–C(39)–O(136) | 121.7 | 123.1 | 122.6 |
| C(43)–C(44)–O(138) | 119.0 | 124.2 | 123.8 |
| C(43)–C(49)–C(48)  | 123.0 | 123.0 | 122.9 |
| C(48)–C(51)–C(56)  | 114.2 | 109.5 | 109.4 |
| C(49)–C(48)–C(51)  | 123.2 | 123.2 | 123.2 |

*Dihedral angles*

|                           |       |       |       |
|---------------------------|-------|-------|-------|
| C(1)–C(2)–O(135)–C(22)    | 71.9  | 87.1  | 89.4  |
| C(2)–O(135)–C(22)–C(25)   | 147.3 | 172.5 | 171.7 |
| C(22)–C(25)–N(133)–C(28)  | 149.9 | 116.7 | 126.2 |
| C(31)–C(30)–C(28)–N(133)  | 132.8 | 179.7 | 179.5 |
| C(45)–C(46)–C(48)–C(51)   | 175.9 | 179.7 | 178.8 |
| C(45)–C(64)–C(67)–C(73)   | 117.1 | 66.2  | 78.0  |
| C(46)–C(45)–C(44)–O(138)  | 175.6 | 175.9 | 177.8 |
| C(46)–C(45)–C(64)–C(67)   | 115.8 | 96.0  | 113.5 |
| C(46)–C(48)–C(51)–C(52)   | 132.8 | 179.4 | 120.5 |
| N(133)–C(25)–C(22)–O(135) | 63.6  | 179.8 | 73.6  |

6

*Bond distances*

|               |       |       |       |
|---------------|-------|-------|-------|
| C(5)–C(34)    | 1.542 | 1.537 | 1.538 |
| C(6)–C(7)     | 1.410 | 1.396 | 1.398 |
| C(15)–S(16)   | 1.778 | 1.796 | 1.812 |
| C(30)–O(1)    | 1.369 | 1.389 | 1.389 |
| C(49)–C(101)  | 1.513 | 1.525 | 1.521 |
| C(49)–O(20)   | 1.450 | 1.457 | 1.457 |
| C(101)–N(104) | 1.469 | 1.452 | 1.450 |
| C(106)–C(110) | 1.426 | 1.445 | 1.445 |
| C(106)–N(104) | 1.289 | 1.294 | 1.294 |

*Angles*

|                      |       |       |       |
|----------------------|-------|-------|-------|
| C(5)–C(6)–C(7)       | 120.7 | 122.0 | 121.9 |
| C(5)–C(34)–C(40)     | 109.9 | 109.3 | 112.1 |
| C(6)–C(5)–C(34)      | 119.0 | 119.9 | 120.1 |
| C(7)–C(18)–O(2)      | 121.4 | 124.0 | 123.0 |
| C(3)–O(20)–C(49)     | 112.5 | 113.9 | 114.4 |
| C(49)–C(101)–N(104)  | 111.1 | 113.7 | 112.1 |
| C(101)–C(49)–O(20)   | 108.5 | 110.1 | 109.1 |
| C(101)–N(104)–C(106) | 118.1 | 117.7 | 119.8 |
| C(106)–C(110)–C(112) | 121.1 | 119.5 | 119.2 |
| C(110)–C(106)–N(104) | 124.1 | 122.8 | 121.6 |
| C(110)–C(109)–O(108) | 123.0 | 122.4 | 123.3 |

*Dihedral angles*

|                       |       |       |       |
|-----------------------|-------|-------|-------|
| C(6)–C(5)–C(34)–C(40) | 167.1 | 179.4 | 179.6 |
| C(6)–C(7)–S(25)–C(8)  | 98.1  | 113.6 | 112.2 |

|                             |       |       |       |
|-----------------------------|-------|-------|-------|
| C(7)–C(6)–C(5)–C(34)        | 172.8 | 179.4 | 179.3 |
| C(7)–S(25)–C(8)–C(3)        | 104.5 | 103.2 | 103.7 |
| C(8)–C(3)–O(20)–C(49)       | 92.1  | 86.9  | 89.3  |
| C(3)–O(20)–C(49)–C(101)     | 179.0 | 167.2 | 175.8 |
| C(49)–C(101)–N(104)–C(106)  | 143.0 | 122.0 | 131.7 |
| C(112)–C(110)–C(106)–N(104) | 175.4 | 179.4 | 179.7 |
| C(112)–C(110)–C(109)–O(108) | 177.9 | 179.9 | 179.8 |
| N(104)–C(101)–C(49)–O(20)   | 61.1  | 80.6  | 71.9  |

---



## 7. IR and Raman spectra characteristics for ligands 3-6

**Table S3.** For **3**, a comparison of experimental and calculated wavenumbers  $\nu$  ( $\text{cm}^{-1}$ ), intensity  $I$  ( $\text{km/mol}$ ) of the bands in the IR spectra and relative intensity  $J$  (a.u.) of the lines in the Raman spectra of *exo-exo* and *endo-exo* rotamers.

| IR <sub>exp</sub> | Raman <sub>exp</sub> | <i>exo-exo</i> |       |        | <i>endo-exo</i> |                                                    |       | Assignment                                         |      |                                                    |     |                                                  |
|-------------------|----------------------|----------------|-------|--------|-----------------|----------------------------------------------------|-------|----------------------------------------------------|------|----------------------------------------------------|-----|--------------------------------------------------|
| $\nu$             | $\nu$                | $\nu$          | $I$   | $J$    | $\nu$           | $I$                                                | $J$   |                                                    |      |                                                    |     |                                                  |
| 3433 m            |                      | 3408           | 875.3 | 12.0   | 3505            | 717.2                                              | 16.3  | $\nu\text{O143-H144}$                              |      |                                                    |     |                                                  |
|                   |                      | 3366           | 910.4 | 1.2    | 3462            | 639.7                                              | 45.2  | $\nu\text{O138-H119}$                              |      |                                                    |     |                                                  |
|                   |                      | 3140           | 10.3  | 5.7    | 3140            | 12.8                                               | 7.3   | $\nu\text{C99-H100}$                               |      |                                                    |     |                                                  |
|                   |                      | 3139           | 11.0  | 10.9   | 3140            | 5.3                                                | 2.8   | $\nu\text{C33-H34}$                                |      |                                                    |     |                                                  |
|                   |                      | 3132           | 2.8   | 2.9    | 3134            | 5.1                                                | 3.1   | $\nu\text{C73-H74}$                                |      |                                                    |     |                                                  |
|                   |                      | 3132           | 6.0   | 8.1    | 3133            | 8.6                                                | 4.7   | $\nu\text{C35-H38}$                                |      |                                                    |     |                                                  |
|                   |                      | 3132           | 7.4   | 1.1    | 3130            | 2.2                                                | 0.0   | $\nu\text{C103-H104}$                              |      |                                                    |     |                                                  |
|                   |                      | 3131           | 3.1   | 4.3    | 3126            | 3.0                                                | 0.0   | $\nu\text{C7-H8}$                                  |      |                                                    |     |                                                  |
|                   |                      | 3114           | 7.9   | 0.4    | 3115            | 6.5                                                | 2.6   | $\nu\text{C49-H50}$                                |      |                                                    |     |                                                  |
|                   |                      | 3114           | 6.2   | 0.4    | 3115            | 5.1                                                | 1.9   | $\nu\text{C112-H113}$                              |      |                                                    |     |                                                  |
|                   |                      | 3113           | 3.0   | 1.4    | 3112            | 2.9                                                | 4.6   | $\nu\text{C101-H102}$                              |      |                                                    |     |                                                  |
|                   |                      | 3110           | 5.0   | 20.1   | 3112            | 6.3                                                | 9.7   | $\nu\text{C35-H36}$                                |      |                                                    |     |                                                  |
|                   |                      | 3101           | 9.4   | 0.5    | 3105            | 5.3                                                | 0.4   | $\nu\text{C70-H71}$                                |      |                                                    |     |                                                  |
|                   |                      | 3100           | 8.0   | 0.3    | 3102            | 3.6                                                | 0.1   | $\nu\text{C4-H5}$                                  |      |                                                    |     |                                                  |
|                   |                      | 3098           | 6.3   | 0.2    | 3102            | 8.4                                                | 0.5   | $\nu\text{C97-H98}$                                |      |                                                    |     |                                                  |
|                   |                      | 3097           | 3.3   | 13.7   | 3097            | 5.7                                                | 1.0   | $\nu\text{C31-H32}$                                |      |                                                    |     |                                                  |
|                   |                      | 3087           | 18.5  | 8.0    | 3091            | 18.0                                               | 0.3   | $\nu\text{C46-H47}$                                |      |                                                    |     |                                                  |
|                   |                      | 3086           | 13.1  | 6.6    | 3091            | 8.9                                                | 0.1   | $\nu\text{C115-H116}$                              |      |                                                    |     |                                                  |
|                   |                      | 3065           | 3.0   | 4.5    | 3060            | 16.6                                               | 0.2   | $\nu\text{C130-H131 } \nu_{\text{as}} \text{CH}_2$ |      |                                                    |     |                                                  |
|                   |                      | 3064           | 5.6   | 0.6    | 3056            | 4.5                                                | 0.0   | $\nu\text{C64-H65 } \nu_{\text{as}} \text{CH}_2$   |      |                                                    |     |                                                  |
|                   |                      | 3056           | 27.6  | 0.3    | 3056            | 8.0                                                | 0.7   | $\nu\text{C76-H77 } \nu_{\text{as}} \text{CH}_3$   |      |                                                    |     |                                                  |
|                   |                      | 3058 w         |       | 3056   | 11.0            | 1.8                                                | 3055  | 5.3                                                | 0.1  | $\nu\text{C14-H16 } \nu_{\text{as}} \text{CH}_3$   |     |                                                  |
|                   |                      |                |       | 3054   | 15.0            | 0.5                                                | 3055  | 37.2                                               | 1.5  | $\nu\text{C10-H13 } \nu_{\text{as}} \text{CH}_3$   |     |                                                  |
|                   |                      |                |       | 3053   | 28.7            | 0.6                                                | 3055  | 28.5                                               | 0.4  | $\nu\text{C56-H59 } \nu_{\text{as}} \text{CH}_3$   |     |                                                  |
|                   |                      |                |       | 3053   | 5.7             | 1.1                                                | 3054  | 20.3                                               | 1.4  | $\nu\text{C118-H120 } \nu_{\text{as}} \text{CH}_3$ |     |                                                  |
|                   |                      |                |       | 3053   | 35.0            | 0.5                                                | 3054  | 5.2                                                | 0.8  | $\nu\text{C80-H81 } \nu_{\text{as}} \text{CH}_3$   |     |                                                  |
|                   |                      |                |       | 3052   | 17.3            | 1.1                                                | 3053  | 14.8                                               | 0.0  | $\nu\text{C122-H125 } \nu_{\text{as}} \text{CH}_3$ |     |                                                  |
|                   |                      |                |       | 3051   | 17.4            | 0.3                                                | 3053  | 14.6                                               | 0.3  | $\nu\text{C60-H63 } \nu_{\text{as}} \text{CH}_3$   |     |                                                  |
|                   |                      |                |       | 3048   | 65.8            | 3.9                                                | 3052  | 16.5                                               | 0.2  | $\nu\text{C84-H85 } \nu_{\text{as}} \text{CH}_3$   |     |                                                  |
|                   |                      |                |       | 3048   | 21.9            | 1.5                                                | 3051  | 68.5                                               | 5.2  | $\nu\text{C18-H21 } \nu_{\text{as}} \text{CH}_3$   |     |                                                  |
|                   |                      |                |       | 3049 w |                 | 3047                                               | 111.0 | 4.2                                                | 3049 | 23.9                                               | 2.4 | $\nu\text{C14-H15 } \nu_{\text{as}} \text{CH}_3$ |
|                   |                      |                |       |        |                 | 3047                                               | 18.8  | 1.6                                                | 3047 | 21.8                                               | 0.4 | $\nu\text{C84-H86 } \nu_{\text{as}} \text{CH}_3$ |
|                   |                      |                |       |        |                 | 3047                                               | 11.9  | 2.6                                                | 3047 | 70.7                                               | 3.1 | $\nu\text{C52-H55 } \nu_{\text{as}} \text{CH}_2$ |
| 3046              | 20.0                 | 3.2            | 3046  |        |                 | 70.8                                               | 1.9   | $\nu\text{C126-H127 } \nu_{\text{as}} \text{CH}_2$ |      |                                                    |     |                                                  |
| 3045              | 73.6                 | 13.9           | 3045  |        |                 | 21.7                                               | 2.7   | $\nu\text{C52-H54 } \nu_{\text{as}} \text{CH}_3$   |      |                                                    |     |                                                  |
| 3045              | 82.3                 | 5.1            | 3045  |        |                 | 6.7                                                | 0.9   | $\nu\text{C126-H127 } \nu_{\text{as}} \text{CH}_3$ |      |                                                    |     |                                                  |
| 3042              | 2.3                  | 3.1            | 3045  |        |                 | 57.5                                               | 2.1   | $\nu\text{C76-H79 } \nu_{\text{as}} \text{CH}_2$   |      |                                                    |     |                                                  |
| 3042              | 2.4                  | 2.5            | 3045  |        |                 | 60.0                                               | 1.9   | $\nu\text{C14-H16 } \nu_{\text{s}} \text{CH}_3$    |      |                                                    |     |                                                  |
| 3041              | 3.1                  | 3.1            | 3043  |        |                 | 2.6                                                | 0.1   | $\nu\text{C10-H11 } \nu_{\text{s}} \text{CH}_3$    |      |                                                    |     |                                                  |
| 3041              | 2.0                  | 1.5            | 3040  |        |                 | 4.4                                                | 2.6   | $\nu\text{C80-H83 } \nu_{\text{as}} \text{CH}_3$   |      |                                                    |     |                                                  |
| 3039              | 11.9                 | 3.4            | 3040  | 3.7    | 1.9             | $\nu\text{C56-H58 } \nu_{\text{as}} \text{CH}_3$   |       |                                                    |      |                                                    |     |                                                  |
| 3039              | 6.2                  | 3.6            | 3039  | 2.8    | 2.6             | $\nu\text{C118-H120 } \nu_{\text{as}} \text{CH}_3$ |       |                                                    |      |                                                    |     |                                                  |
| 3038              | 5.1                  | 0.4            | 3039  | 5.0    | 1.3             | $\nu\text{C60-H61 } \nu_{\text{as}} \text{CH}_3$   |       |                                                    |      |                                                    |     |                                                  |

|         |        |      |       |      |      |       |      |                                            |
|---------|--------|------|-------|------|------|-------|------|--------------------------------------------|
|         |        | 3038 | 3.8   | 0.4  | 3038 | 7.2   | 0.1  | vC122-H123 v <sub>as</sub> CH <sub>3</sub> |
|         |        | 3033 | 6.5   | 2.5  | 3038 | 5.1   | 0.3  | vC40-H41 v <sub>as</sub> CH <sub>2</sub>   |
|         |        | 3032 | 5.9   | 2.4  | 3031 | 5.9   | 0.2  | vC106-H107 v <sub>as</sub> CH <sub>2</sub> |
|         |        | 3010 | 19.4  | 2.4  | 3030 | 5.3   | 0.9  | vC22-H24 v <sub>s</sub> CH <sub>2</sub>    |
|         |        | 3002 | 17.5  | 0.8  | 3029 | 16.8  | 10.3 | vC91-H93 v <sub>s</sub> CH <sub>2</sub>    |
|         |        | 2991 | 24.0  | 4.5  | 2998 | 35.2  | 0.5  | vC88-H89 v <sub>s</sub> CH <sub>2</sub>    |
|         |        | 2990 | 22.8  | 2.7  | 2991 | 2.9   | 26.6 | vC130-H132 v <sub>s</sub> CH <sub>2</sub>  |
|         |        | 2989 | 12.6  | 0.2  | 2987 | 8.0   | 3.0  | vC64-H65 v <sub>s</sub> CH <sub>2</sub>    |
|         |        | 2986 | 25.6  | 33.9 | 2986 | 26.2  | 1.3  | vC40-H42 v <sub>s</sub> CH <sub>2</sub>    |
|         |        | 2985 | 25.1  | 16.5 | 2984 | 23.1  | 1.5  | vC106-H107 v <sub>s</sub> CH <sub>2</sub>  |
|         |        | 2984 | 1.8   | 1.8  | 2983 | 35.7  | 12.7 | vC25-H27 v <sub>s</sub> CH <sub>2</sub>    |
|         |        | 2973 | 39.9  | 0.4  | 2982 | 15.2  | 2.6  | vC76-H77 v <sub>s</sub> CH <sub>3</sub>    |
|         |        | 2973 | 23.6  | 3.6  | 2976 | 25.6  | 0.3  | vC10-H11 v <sub>s</sub> CH <sub>3</sub>    |
|         |        | 2971 | 29.2  | 4.9  | 2974 | 18.1  | 4.2  | vC52-H53 v <sub>s</sub> CH <sub>3</sub>    |
|         |        | 2971 | 33.4  | 2.0  | 2972 | 38.0  | 3.3  | vC122-H123 v <sub>s</sub> CH <sub>3</sub>  |
|         |        | 2967 | 15.3  | 0.7  | 2972 | 41.3  | 3.1  | vC80-H81 v <sub>s</sub> CH <sub>3</sub>    |
|         |        | 2966 | 28.1  | 1.9  | 2971 | 17.7  | 3.2  | vC14-H15 v <sub>s</sub> CH <sub>2</sub>    |
|         |        | 2966 | 22.6  | 0.1  | 2969 | 16.2  | 2.4  | vC18-H19 v <sub>s</sub> CH <sub>3</sub>    |
|         |        | 2965 | 13.2  | 1.0  | 2967 | 20.7  | 0.2  | vC84-H85 v <sub>s</sub> CH <sub>3</sub>    |
| 2959 s  | 2959 m | 2964 | 27.7  | 5.4  | 2965 | 4.0   | 0.2  | vC60-H61 v <sub>s</sub> CH <sub>3</sub>    |
|         |        | 2964 | 24.3  | 6.3  | 2965 | 27.4  | 0.4  | vC118-H119 v <sub>s</sub> CH <sub>2</sub>  |
|         |        | 2963 | 25.5  | 4.1  | 2965 | 26.4  | 0.1  | vC56-H58 v <sub>s</sub> CH <sub>3</sub>    |
|         |        | 2963 | 24.4  | 1.2  | 2964 | 42.7  | 2.2  | vC118-H120 v <sub>s</sub> CH <sub>3</sub>  |
|         |        | 2960 | 15.6  | 7.9  | 2964 | 20.7  | 0.5  | vC28-H29                                   |
|         |        | 2951 | 37.9  | 0.6  | 2963 | 21.3  | 0.1  | vC22-H23 v <sub>s</sub> CH <sub>2</sub>    |
|         |        | 2942 | 43.4  | 0.6  | 2961 | 21.5  | 4.7  | vC88-H89 v <sub>s</sub> CH <sub>2</sub>    |
|         | 2939 m | 2938 | 11.8  | 5.5  | 2945 | 34.5  | 0.4  | vC25-H26 v <sub>s</sub> CH <sub>2</sub>    |
|         |        | 2931 | 34.6  | 32.3 | 2928 | 21.7  | 5.0  | vC94-H95                                   |
| 2905 m  | 2908 m | 2910 | 17.4  | 1.8  | 2925 | 32.5  | 0.1  | vC91-H92 v <sub>s</sub> CH <sub>2</sub>    |
| 2869 m  | 2781 w | 2808 | 492.4 | 8.7  | 2762 | 751.2 | 1.2  | vO141-H142                                 |
| 2360 vw | 2710 w | 2706 | 831.7 | 11.9 | 2609 | 703.7 | 25.4 | vO136-H137                                 |
|         | 1643 s | 1646 | 112.2 | 18.6 | 1648 | 81.3  | 5.5  | βO136-H137                                 |
| 1633 s  | 1638 s | 1633 | 387.5 | 70.4 | 1643 | 101.4 | 5.7  | vC94=N134                                  |
|         |        | 1630 | 72.1  | 10.1 | 1635 | 484.1 | 66.2 | vC28=N133                                  |
|         |        | 1630 | 142.4 | 16.7 | 1632 | 69.5  | 32.7 | βO141-H142                                 |
|         | 1610 m | 1602 | 4.3   | 87.7 | 1598 | 1.6   | 1.2  | vC11-C14                                   |
|         |        | 1602 | 4.9   | 6.6  | 1598 | 6.9   | 11.1 | vC109-C115                                 |
|         |        | 1596 | 23.7  | 59.7 | 1598 | 19.0  | 7.7  | vC45-C46                                   |
|         |        | 1591 | 17.8  | 4.3  | 1595 | 35.3  | 24.5 | vC30-C31                                   |
|         |        | 1591 | 8.6   | 5.9  | 1594 | 1.9   | 3.5  | vC3-C4                                     |
| 1582 w  | 1586 m | 1586 | 56.5  | 7.6  | 1587 | 15.1  | 29.3 | vC69-C70                                   |
|         |        | 1580 | 8.8   | 9.0  | 1582 | 15.3  | 1.0  | vC46-C48                                   |
|         |        | 1576 | 4.8   | 4.0  | 1581 | 4.0   | 1.9  | vC43-C44                                   |
| 1560 vw |        | 1573 | 6.9   | 4.6  | 1574 | 7.5   | 0.8  | vC2-C3                                     |
| 1541 vw |        | 1570 | 11.5  | 0.1  | 1564 | 1.9   | 0.5  | vC1-C7                                     |
|         |        | 1515 | 46.7  | 5.4  | 1518 | 34.4  | 25.2 | vC33-C35                                   |
|         |        | 1506 | 60.2  | 3.6  | 1513 | 42.2  | 2.8  | vC99-C101                                  |
|         |        | 1481 | 32.4  | 1.5  | 1513 | 11.9  | 3.9  | βC22-H23 δ <sub>s</sub> CH <sub>2</sub>    |
|         |        | 1480 | 80.1  | 22.0 | 1480 | 53.0  | 9.8  | vC44-O138                                  |
| 1485 s  |        | 1478 | 120.7 | 6.5  | 1477 | 148.4 | 5.8  | vC109-C110                                 |
|         |        | 1474 | 19.6  | 6.1  | 1477 | 26.0  | 0.3  | βC76-H77 δ <sub>s</sub> CH <sub>3</sub>    |
|         |        | 1474 | 26.4  | 13.9 | 1474 | 38.4  | 0.2  | βC10-H11 δ <sub>s</sub> CH <sub>3</sub>    |
|         |        | 1471 | 1.2   | 11.4 | 1472 | 5.3   | 2.2  | βC52-H53 δ <sub>s</sub> CH <sub>3</sub>    |

|         |         |      |      |      |      |      |      |                                              |
|---------|---------|------|------|------|------|------|------|----------------------------------------------|
|         |         | 1470 | 3.3  | 7.8  | 1471 | 1.0  | 6.6  | $\beta$ C126-H127 $\delta_s$ CH <sub>3</sub> |
|         | 1467 m  | 1465 | 6.7  | 9.4  | 1470 | 6.4  | 3.2  | $\beta$ C88-H89 $\delta_s$ CH <sub>2</sub>   |
|         |         | 1461 | 34.9 | 0.9  | 1460 | 5.8  | 23.5 | $\beta$ C18-H19 $\delta_s$ CH <sub>2</sub>   |
|         |         | 1459 | 5.7  | 3.1  | 1459 | 49.7 | 0.2  | $\beta$ C84-H85 $\delta_s$ CH <sub>3</sub>   |
|         |         | 1458 | 24.3 | 2.8  | 1459 | 12.2 | 27.8 | $\beta$ C126-H128 $\delta_s$ CH <sub>3</sub> |
|         |         | 1458 | 4.4  | 4.1  | 1458 | 6.1  | 1.0  | $\beta$ C18-H20 $\delta_s$ CH <sub>3</sub>   |
|         |         | 1457 | 13.2 | 0.9  | 1458 | 6.4  | 0.5  | $\beta$ C56-H57 $\delta_s$ CH <sub>2</sub>   |
| 1462 m  |         | 1457 | 53.1 | 14.5 | 1457 | 47.7 | 35.5 | vC105-O141                                   |
|         |         | 1456 | 55.5 | 57.3 | 1457 | 19.8 | 0.8  | vC31-C33                                     |
|         |         | 1455 | 7.4  | 2.1  | 1455 | 8.5  | 0.1  | $\beta$ C88-H90 $\delta_s$ CH <sub>2</sub>   |
|         |         | 1454 | 3.7  | 0.4  | 1455 | 3.9  | 0.1  | $\beta$ C60-H61 $\delta_s$ CH <sub>3</sub>   |
|         |         | 1453 | 21.8 | 0.2  | 1453 | 62.1 | 6.3  | $\beta$ C122-H125 $\delta_s$ CH <sub>3</sub> |
|         |         | 1452 | 23.7 | 4.0  | 1449 | 87.3 | 2.0  | $\beta$ C25-H27 $\delta_s$ CH <sub>2</sub>   |
|         |         | 1450 | 27.2 | 0.6  | 1449 | 28.5 | 79.0 | vC2-C3                                       |
| 1444 sh | 1449 m  | 1448 | 36.8 | 6.0  | 1444 | 13.5 | 2.3  | vC68-O140                                    |
|         |         | 1441 | 4.2  | 0.5  | 1442 | 13.4 | 0.2  | $\beta$ C52-H55 $\delta_s$ CH <sub>3</sub>   |
|         |         | 1441 | 2.0  | 0.3  | 1441 | 3.7  | 1.7  | $\beta$ C56-H59 $\delta_s$ CH <sub>3</sub>   |
|         |         | 1440 | 5.5  | 0.4  | 1441 | 0.3  | 0.2  | $\beta$ C10-H12 $\delta_s$ CH <sub>3</sub>   |
|         |         | 1440 | 11.7 | 1.1  | 1440 | 13.4 | 0.5  | $\beta$ C76-H78 $\delta_s$ CH <sub>3</sub>   |
|         |         | 1439 | 16.8 | 17.2 | 1439 | 1.6  | 7.4  | $\beta$ O136-H137                            |
|         |         | 1437 | 0.5  | 0.4  | 1439 | 5.4  | 14.4 | $\beta$ C118-H120 $\delta_s$ CH <sub>3</sub> |
|         |         | 1437 | 0.4  | 0.2  | 1438 | 45.6 | 2.1  | $\beta$ C14-H17 $\delta_s$ CH <sub>2</sub>   |
|         |         | 1436 | 0.3  | 0.1  | 1438 | 0.9  | 0.3  | $\beta$ C76-H79 $\delta_s$ CH <sub>2</sub>   |
|         |         | 1436 | 0.4  | 0.3  | 1437 | 1.2  | 0.1  | $\beta$ C60-H63 $\delta_s$ CH <sub>3</sub>   |
|         |         | 1432 | 22.6 | 2.8  | 1436 | 0.8  | 0.7  | vC101-C103                                   |
|         |         | 1431 | 0.1  | 0.6  | 1435 | 0.7  | 0.1  | $\beta$ C18-H19 $\delta_s$ CH <sub>3</sub>   |
|         |         | 1431 | 3.4  | 0.4  | 1435 | 2.7  | 0.8  | $\beta$ C126-H129 $\delta_s$ CH <sub>3</sub> |
|         |         | 1430 | 0.1  | 0.6  | 1433 | 25.6 | 18.4 | $\beta$ C84-H87 $\delta_s$ CH <sub>3</sub>   |
|         |         | 1430 | 5.1  | 2.7  | 1433 | 0.8  | 0.2  | $\beta$ C56-H58 $\delta_s$ CH <sub>3</sub>   |
|         |         | 1430 | 35.7 | 8.8  | 1432 | 0.3  | 0.1  | $\beta$ C100-H108 $\delta_s$ CH <sub>3</sub> |
|         |         | 1428 | 19.2 | 7.7  | 1432 | 0.2  | 0.0  | $\beta$ C40-H42 $\delta_s$ CH <sub>2</sub>   |
|         |         | 1420 | 18.9 | 5.1  | 1431 | 0.4  | 0.2  | $\beta$ C130-H132 $\delta_s$ CH <sub>2</sub> |
|         |         | 1418 | 8.3  | 6.5  | 1430 | 3.7  | 1.9  | vC45-C46                                     |
| 1418 w  |         | 1418 | 25.1 | 30.3 | 1428 | 22.9 | 12.8 | $\beta$ C64-H65 $\delta_s$ CH <sub>2</sub>   |
|         | 1416 vw | 1417 | 8.1  | 9.0  | 1414 | 10.1 | 1.1  | vC43-C49                                     |
|         |         | 1411 | 22.2 | 0.4  | 1412 | 8.3  | 0.5  | $\beta$ C91-H92 $\delta_s$ CH <sub>2</sub>   |
|         |         | 1405 | 11.2 | 4.9  | 1403 | 8.7  | 1.8  | vC1-C130                                     |
| 1393 w  | 1400 vw | 1404 | 1.7  | 18.6 | 1401 | 3.9  | 0.0  | vC67-C73                                     |
|         |         | 1377 | 6.6  | 9.6  | 1379 | 8.2  | 5.1  | $\beta$ C10-H13 $\delta_s$ CH <sub>3</sub>   |
|         |         | 1377 | 4.5  | 6.2  | 1377 | 12.3 | 0.4  | $\beta$ C76-H77 $\delta_s$ CH <sub>3</sub>   |
|         |         | 1376 | 5.3  | 17.5 | 1376 | 3.4  | 0.5  | $\beta$ C25-H26 wag CH <sub>2</sub>          |
|         |         | 1375 | 8.3  | 5.5  | 1375 | 5.9  | 2.7  | $\beta$ C126-H129 $\delta_s$ CH <sub>3</sub> |
|         | 1374 vw | 1375 | 1.5  | 0.3  | 1374 | 13.2 | 0.2  | $\beta$ C52-H55 $\delta_s$ CH <sub>3</sub>   |
| 1363 m  |         | 1369 | 80.7 | 92.8 | 1374 | 16.4 | 3.4  | $\beta$ O138-H139                            |
|         |         | 1365 | 43.4 | 33.3 | 1369 | 30.8 | 18.7 | $\beta$ O143-H144                            |
|         |         | 1360 | 5.1  | 1.7  | 1360 | 43.1 | 6.2  | $\beta$ C91-H92 wag CH <sub>2</sub>          |
|         |         | 1356 | 59.7 | 23.6 | 1353 | 5.7  | 2.9  | $\beta$ C88-H89 wag CH <sub>2</sub>          |
|         |         | 1353 | 9.0  | 46.4 | 1350 | 6.9  | 5.5  | vC30-C39                                     |
|         |         | 1348 | 18.0 | 33.1 | 1345 | 6.3  | 4.7  | vC96-C105                                    |
|         | 1346 vw | 1347 | 8.0  | 1.6  | 1344 | 16.3 | 30.1 | vC28-C30                                     |
|         |         | 1342 | 3.3  | 1.8  | 1344 | 3.2  | 4.4  | vC75-C84                                     |
|         |         | 1342 | 10.1 | 5.4  | 1343 | 11.1 | 0.6  | vC9-C10                                      |
|         |         | 1342 | 7.7  | 1.7  | 1341 | 0.2  | 0.3  | $\beta$ C10-H12 $\delta_s$ CH <sub>3</sub>   |
|         |         | 1341 | 10.4 | 3.7  | 1341 | 21.7 | 1.1  | $\beta$ C80-H83 $\delta_s$ CH <sub>3</sub>   |
|         |         | 1341 | 27.5 | 3.5  | 1340 | 3.6  | 1.6  | vC75-C80                                     |

|         |         |      |       |       |      |       |       |                                              |
|---------|---------|------|-------|-------|------|-------|-------|----------------------------------------------|
| 1340 w  |         | 1341 | 11.5  | 0.2   | 1340 | 28.5  | 0.0   | vC51-C52                                     |
|         | 1340 w  | 1340 | 8.7   | 1.0   | 1340 | 9.9   | 0.4   | $\beta$ C122-H124 $\delta_s$ CH <sub>3</sub> |
|         |         | 1339 | 10.4  | 0.5   | 1339 | 13.9  | 0.1   | $\beta$ C56-H58 $\delta_s$ CH <sub>3</sub>   |
|         |         | 1338 | 5.5   | 14.4  | 1336 | 5.2   | 100.0 | vC6-C7                                       |
|         |         | 1337 | 1.6   | 100.0 | 1331 | 2.0   | 5.9   | v51-C52                                      |
|         | 1321 m  | 1326 | 33.7  | 3.6   | 1318 | 2.4   | 4.9   | $\beta$ C91-H92 wag CH <sub>2</sub>          |
|         |         | 1319 | 2.6   | 2.9   | 1313 | 2.5   | 1.1   | vC44-O138                                    |
|         | 1308 sh | 1312 | 4.4   | 13.1  | 1303 | 47.6  | 0.6   | vC109-C110                                   |
|         |         | 1304 | 40.7  | 0.4   | 1299 | 26.9  | 0.4   | vC139-O136                                   |
| 1299 sh |         | 1298 | 33.2  | 0.8   | 1287 | 33.6  | 1.0   | vC105-O141                                   |
|         |         | 1295 | 19.3  | 9.2   | 1285 | 20.1  | 22.9  | $\beta$ C22-H24 wag CH <sub>2</sub>          |
| 1280 m  |         | 1286 | 142.5 | 61.4  | 1282 | 15.6  | 7.5   | $\beta$ C130-H131 wag CH <sub>2</sub>        |
|         | 1284 vw | 1283 | 37.2  | 5.5   | 1278 | 69.2  | 0.7   | vC48-C51                                     |
|         |         | 1281 | 94.4  | 15.5  | 1277 | 70.6  | 21.9  | vC72-C75                                     |
|         | 1243 w  | 1280 | 47.4  | 0.8   | 1276 | 27.6  | 6.7   | $\beta$ C130-H132 wag CH <sub>2</sub>        |
|         |         | 1274 | 8.5   | 2.3   | 1266 | 46.4  | 8.7   | $\beta$ C25-H27 wag CH <sub>2</sub>          |
|         |         | 1271 | 1.5   | 2.3   | 1265 | 12.3  | 20.8  | $\beta$ C65-H65 wag CH <sub>2</sub>          |
|         |         | 1267 | 4.0   | 15.5  | 1258 | 4.4   | 14.0  | $\beta$ C91-H93 wag CH <sub>2</sub>          |
|         | 1266 w  | 1265 | 7.0   | 3.6   | 1257 | 1.7   | 0.1   | $\beta$ C22-H24 wag CH <sub>2</sub>          |
|         |         | 1263 | 6.4   | 26.7  | 1256 | 3.6   | 3.9   | $\beta$ C25-H26 wag CH <sub>2</sub>          |
|         |         | 1262 | 25.6  | 0.9   | 1255 | 0.4   | 1.4   | $\beta$ C106-H107                            |
|         |         | 1256 | 21.3  | 1.7   | 1249 | 103.0 | 1.4   | vC48-C51                                     |
|         | 1250 m  | 1253 | 3.4   | 0.2   | 1242 | 1.4   | 4.8   | vC44-O138                                    |
| 1239 w  |         | 1237 | 4.0   | 6.3   | 1239 | 3.3   | 0.2   | $\beta$ C7-H8                                |
|         |         | 1235 | 6.2   | 14.9  | 1233 | 0.1   | 0.1   | $\beta$ C70-H71                              |
|         | 1232 m  | 1232 | 3.8   | 6.9   | 1231 | 6.2   | 3.2   | $\beta$ C31-H32                              |
|         | 1225 m  | 1228 | 9.7   | 2.4   | 1230 | 3.4   | 7.1   | vC96-C97                                     |
|         |         | 1221 | 104.7 | 1.2   | 1220 | 46.1  | 23.6  | $\beta$ C46-H47                              |
|         |         | 1217 | 20.7  | 4.6   | 1217 | 14.8  | 6.3   | vC68-O140                                    |
|         |         | 1215 | 9.0   | 25.4  | 1212 | 8.7   | 2.5   | vC2-O135                                     |
|         |         | 1213 | 11.1  | 1.2   | 1208 | 37.3  | 12.3  | $\beta$ O138-H139                            |
|         |         | 1210 | 6.8   | 0.5   | 1206 | 25.2  | 12.2  | $\beta$ C88-H89 $\rho$ CH <sub>2</sub>       |
| 1208 sh | 1209 m  | 1209 | 47.6  | 1.4   | 1205 | 63.3  | 0.3   | vC28-C30                                     |
|         |         | 1202 | 13.0  | 1.3   | 1198 | 39.1  | 2.4   | vC94-C96                                     |
|         |         | 1199 | 32.2  | 6.8   | 1197 | 12.5  | 0.2   | vC51-C52                                     |
| 1195 m  |         | 1198 | 40.3  | 15.4  | 1195 | 7.6   | 1.3   | vC100-C109                                   |
|         |         | 1194 | 6.9   | 3.4   | 1193 | 0.8   | 3.2   | vC6-C9                                       |
|         |         | 1193 | 6.7   | 4.0   | 1191 | 4.4   | 0.3   | vC72-C75                                     |
|         |         | 1190 | 13.5  | 25.0  | 1190 | 34.8  | 19.3  | vC117-C126                                   |
|         |         | 1189 | 34.2  | 5.6   | 1189 | 9.2   | 0.1   | vC51-C56                                     |
|         |         | 1189 | 3.2   | 0.4   | 1188 | 12.8  | 0.3   | vC9-C10                                      |
|         |         | 1189 | 6.5   | 2.2   | 1188 | 7.0   | 0.1   | vC75-C80                                     |
|         |         | 1188 | 9.1   | 2.4   | 1188 | 4.8   | 0.4   | C51-C60                                      |
|         |         | 1187 | 2.6   | 0.1   | 1188 | 39.0  | 6.4   | vC114-C117                                   |
|         | 1182 vw | 1187 | 4.7   | 6.0   | 1187 | 7.3   | 1.9   | $\beta$ C22-H23 $\rho$ CH <sub>2</sub>       |
|         |         | 1173 | 108.8 | 8.7   | 1174 | 165.2 | 0.4   | vC2-O135                                     |
|         |         | 1169 | 56.9  | 0.2   | 1164 | 32.0  | 15.1  | vC68-O140                                    |
| 1151 w  | 1158 w  | 1158 | 48.6  | 11.5  | 1151 | 2.5   | 0.2   | vC1-C7                                       |
|         |         | 1154 | 22.8  | 5.4   | 1149 | 32.1  | 5.2   | $\beta$ C40-H42 $\rho$ CH <sub>2</sub>       |
|         |         | 1149 | 12.3  | 4.8   | 1144 | 16.4  | 0.6   | $\beta$ C106-H107 $\rho$ CH <sub>2</sub>     |
|         |         | 1148 | 5.8   | 1.1   | 1142 | 11.6  | 0.7   | $\beta$ C40-H41 $\rho$ CH <sub>2</sub>       |
|         |         | 1142 | 7.2   | 2.2   | 1142 | 14.2  | 9.7   | $\beta$ C99-H100                             |
|         |         | 1141 | 19.1  | 1.6   | 1135 | 0.5   | 4.0   | $\beta$ C33-H34                              |
| 1123 m  | 1130 m  | 1123 | 27.3  | 0.4   | 1126 | 24.3  | 0.7   | vC25-N133                                    |

|        |         |      |       |      |      |       |      |                                          |
|--------|---------|------|-------|------|------|-------|------|------------------------------------------|
|        |         | 1112 | 7.3   | 0.4  | 1121 | 26.0  | 3.4  | $\beta$ C101-H102                        |
|        |         | 1112 | 69.3  | 2.5  | 1110 | 68.5  | 7.8  | $\beta$ C112-H113                        |
|        |         | 1104 | 0.7   | 7.8  | 1104 | 3.9   | 2.0  | $\beta$ C37-H38                          |
|        | 1105 vw | 1103 | 8.2   | 2.9  | 1102 | 6.8   | 2.1  | $\beta$ C115-H116                        |
|        |         | 1090 | 12.0  | 4.2  | 1099 | 9.0   | 0.3  | $\beta$ C4-H5                            |
| 1097 w |         | 1085 | 40.6  | 12.5 | 1091 | 15.4  | 1.8  | vC88-C91                                 |
|        | 1077 vw | 1083 | 50.7  | 1.1  | 1080 | 44.5  | 7.5  | vC91-N134                                |
|        |         | 1065 | 9.3   | 2.7  | 1058 | 9.4   | 1.0  | vC94=N134                                |
| 1052 w | 1060 w  | 1058 | 1.4   | 12.5 | 1057 | 0.7   | 4.0  | vC22-C25                                 |
|        | 1036 m  | 1038 | 10.9  | 1.2  | 1035 | 1.0   | 0.4  | vC25-N133                                |
| 1031 w |         | 1033 | 112.5 | 15.6 | 1035 | 18.5  | 11.0 | vC88-O140                                |
|        |         | 1025 | 28.0  | 0.8  | 1020 | 22.7  | 0.4  | vC99-C101                                |
|        |         | 1020 | 16.2  | 49.8 | 1019 | 20.6  | 3.7  | vC33-C35                                 |
| 1016 w |         | 1014 | 0.2   | 1.3  | 1015 | 0.4   | 1.6  | vC9-C10                                  |
|        |         | 1014 | 0.0   | 1.0  | 1015 | 0.1   | 0.0  | vC117-C118                               |
|        |         | 1014 | 0.1   | 0.2  | 1013 | 1.9   | 0.1  | $\beta$ C60-H61 $\rho$ CH <sub>3</sub>   |
|        |         | 1013 | 0.3   | 1.5  | 1013 | 0.3   | 0.1  | $\beta$ C80-H81 $\rho$ CH <sub>3</sub>   |
|        |         | 1013 | 0.6   | 1.1  | 1013 | 6.2   | 0.3  | $\beta$ C14-H15 $\rho$ CH <sub>3</sub>   |
|        |         | 1012 | 0.9   | 0.5  | 1013 | 51.7  | 2.2  | $\beta$ C118-H119 $\rho$ CH <sub>3</sub> |
|        |         | 1011 | 1.2   | 1.0  | 1012 | 0.4   | 0.1  | $\beta$ C84-H85 $\rho$ CH <sub>3</sub>   |
|        |         | 1011 | 1.7   | 9.1  | 1011 | 0.7   | 5.1  | $\beta$ C52-H53 $\rho$ CH <sub>3</sub>   |
|        |         | 1002 | 180.8 | 4.1  | 1011 | 1.2   | 0.2  | vC22-O135                                |
|        | 989 vw  | 998  | 96.0  | 0.5  | 1000 | 85.4  | 5.6  | vC22-C25                                 |
| 979 w  | 977 vw  | 973  | 28.3  | 0.6  | 975  | 192.3 | 36.8 | $\gamma$ O141-H142                       |
|        |         | 971  | 36.1  | 2.5  | 971  | 10.4  | 0.3  | $\gamma$ C94-H95                         |
|        |         | 968  | 6.1   | 0.4  | 970  | 125.1 | 9.6  | vC64-C67                                 |
|        |         | 967  | 37.4  | 5.9  | 968  | 3.8   | 3.1  | vC1-C130                                 |
|        |         | 963  | 0.9   | 5.2  | 960  | 0.6   | 0.6  | $\gamma$ C28-H29                         |
|        |         | 960  | 1.8   | 0.5  | 960  | 0.5   | 0.0  | $\gamma$ C99-H100                        |
|        |         | 957  | 0.4   | 0.1  | 958  | 2.9   | 4.4  | $\gamma$ C35-H36                         |
|        |         | 956  | 2.0   | 1.2  | 953  | 8.1   | 1.5  | vC3-C40                                  |
|        |         | 955  | 1.2   | 5.2  | 952  | 2.0   | 0.7  | $\gamma$ C97-H98                         |
| 942 w  | 931 w   | 932  | 12.4  | 5.2  | 945  | 11.1  | 1.3  | vC69-C106                                |
|        |         | 930  | 5.2   | 26.0 | 935  | 23.4  | 2.0  | vC45-C64                                 |
|        |         | 928  | 0.6   | 1.8  | 929  | 0.4   | 0.5  | $\beta$ C84-H87 $\rho$ CH <sub>3</sub>   |
|        |         | 927  | 3.0   | 0.6  | 928  | 1.2   | 0.6  | $\beta$ C18-H19 $\rho$ CH <sub>3</sub>   |
| 924 w  |         | 927  | 5.1   | 1.3  | 927  | 2.1   | 1.8  | $\beta$ C14-H15 $\rho$ CH <sub>3</sub>   |
|        |         | 925  | 0.2   | 0.0  | 927  | 0.1   | 0.0  | $\beta$ C118-H119 $\rho$ CH <sub>3</sub> |
|        |         | 925  | 0.3   | 0.0  | 927  | 0.6   | 0.2  | $\beta$ C56-H59 $\rho$ CH <sub>3</sub>   |
|        |         | 922  | 1.0   | 0.2  | 925  | 18.2  | 1.2  | $\beta$ C60-H61 $\rho$ CH <sub>3</sub>   |
|        |         | 920  | 0.3   | 0.4  | 920  | 0.6   | 0.0  | $\gamma$ C31-H32                         |
|        |         | 919  | 3.0   | 0.1  | 919  | 2.0   | 0.7  | $\gamma$ C103-H104                       |
|        |         | 916  | 6.2   | 7.7  | 918  | 1.0   | 0.5  | vC75-C84                                 |
|        |         | 916  | 1.9   | 2.4  | 916  | 2.2   | 1.1  | vC9-C18                                  |
|        |         | 914  | 3.3   | 1.0  | 915  | 2.2   | 1.0  | vC51-C52                                 |
|        |         | 913  | 14.7  | 13.5 | 914  | 1.8   | 1.2  | vC88-C91                                 |
|        |         | 913  | 6.6   | 5.8  | 913  | 0.2   | 0.1  | vC40-C43                                 |
|        |         | 907  | 0.9   | 0.9  | 911  | 0.6   | 0.1  | vC9-C14                                  |
|        |         | 907  | 2.4   | 1.0  | 908  | 1.4   | 1.5  | vC75-C80                                 |
|        |         | 905  | 4.0   | 0.3  | 906  | 1.2   | 1.4  | vC117-C122                               |
|        |         | 904  | 0.3   | 2.6  | 905  | 1.6   | 0.2  | vC117-C118                               |
|        |         | 904  | 1.6   | 0.6  | 904  | 1.9   | 0.1  | vC51-C56                                 |
|        |         | 902  | 2.3   | 3.5  | 901  | 5.6   | 0.5  | $\beta$ C40-H41 $\rho$ CH <sub>2</sub>   |
|        |         | 899  | 24.4  | 23.4 | 900  | 5.4   | 0.1  | $\beta$ C64-H65 $\rho$ CH <sub>2</sub>   |

|        |        |     |      |      |     |      |      |                                          |
|--------|--------|-----|------|------|-----|------|------|------------------------------------------|
|        |        | 894 | 2.9  | 0.2  | 891 | 0.9  | 0.1  | $\beta$ C130-H131 $\rho$ CH <sub>2</sub> |
|        | 889 vw | 888 | 9.7  | 65.3 | 887 | 13.9 | 26.9 | $\beta$ <sub>R</sub>                     |
|        |        | 884 | 5.4  | 5.8  | 886 | 7.7  | 11.4 | $\beta$ <sub>R</sub>                     |
|        |        | 879 | 3.7  | 2.3  | 877 | 2.4  | 0.3  | $\gamma$ C46-H47                         |
| 873 m  | 876 vw | 874 | 3.9  | 5.3  | 875 | 1.1  | 0.1  | $\gamma$ C112-H113                       |
|        |        | 873 | 2.6  | 0.2  | 871 | 0.1  | 0.3  | $\gamma$ C49-H50                         |
|        |        | 868 | 0.3  | 0.3  | 868 | 2.8  | 2.2  | $\gamma$ C70-H71                         |
|        |        | 864 | 11.8 | 8.4  | 866 | 4.4  | 0.1  | $\gamma$ C73-H74                         |
|        |        | 862 | 9.1  | 0.3  | 858 | 21.4 | 0.5  | $\gamma$ C49-H50                         |
|        |        | 857 | 17.0 | 1.2  | 854 | 14.3 | 0.2  | $\gamma$ C116-H115                       |
|        |        | 856 | 17.5 | 0.2  | 854 | 3.4  | 0.4  | $\nu$ C70-C72                            |
|        |        | 853 | 6.8  | 2.9  | 841 | 12.7 | 0.0  | $\gamma$ C7-H8                           |
|        |        | 839 | 9.0  | 0.2  | 839 | 1.0  | 0.1  | $\gamma$ C97-H98                         |
|        |        | 838 | 4.1  | 0.1  | 814 | 3.9  | 0.9  | $\gamma$ C37-H38                         |
| 814 w  | 820 m  | 817 | 4.8  | 13.0 | 809 | 8.4  | 0.1  | $\nu$ C2-O135                            |
|        |        | 810 | 9.3  | 1.2  | 808 | 3.6  | 0.0  | $\nu$ C110-O143                          |
|        |        | 807 | 4.8  | 8.2  | 804 | 16.8 | 2.3  | $\beta$ C25-H26 $\rho$ CH <sub>2</sub>   |
|        |        | 805 | 8.5  | 5.7  | 800 | 5.7  | 1.1  | $\beta$ C22-H23 $\rho$ CH <sub>2</sub>   |
| 801 sh |        | 801 | 1.8  | 5.5  | 797 | 0.6  | 4.7  | $\gamma$ C67-C68                         |
|        |        | 796 | 5.2  | 27.6 | 791 | 0.3  | 27.4 | $\beta$ <sub>R</sub>                     |
|        |        | 794 | 2.1  | 1.5  | 782 | 11.5 | 1.3  | $\nu$ C72-C75                            |
| 779 w  | 783 m  | 781 | 13.3 | 0.1  | 773 | 8.3  | 0.1  | $\gamma$ C44-O134                        |
|        |        | 777 | 22.6 | 0.1  | 772 | 3.7  | 0.2  | $\nu$ C110-O143                          |
|        |        | 774 | 2.6  | 2.3  | 770 | 7.1  | 1.7  | $\beta$ <sub>R</sub>                     |
| 755 m  | 764 vw | 771 | 9.4  | 13.4 | 761 | 11.1 | 6.0  | $\beta$ <sub>R</sub>                     |
|        |        | 754 | 27.1 | 0.8  | 747 | 3.6  | 0.1  | $\beta$ <sub>R</sub>                     |
|        |        | 744 | 23.4 | 1.0  | 744 | 16.6 | 0.5  | $\gamma$ C31-H32                         |
| 736 w  | 743 vw | 743 | 14.4 | 1.4  | 744 | 27.0 | 0.1  | $\gamma$ C99-H100                        |
|        |        | 740 | 66.9 | 0.5  | 741 | 4.1  | 4.1  | $\beta$ C91-H92 $\rho$ CH <sub>2</sub>   |
|        |        | 731 | 24.8 | 0.2  | 731 | 8.8  | 0.5  | $\beta$ <sub>R</sub>                     |
|        |        | 730 | 75.7 | 1.1  | 731 | 20.0 | 2.9  | $\gamma$ C103-H104                       |
|        |        | 729 | 21.6 | 0.5  | 730 | 61.5 | 1.3  | $\gamma$ C101-H102                       |
|        |        | 725 | 16.5 | 0.3  | 718 | 56.7 | 0.4  | $\beta$ <sub>R</sub>                     |
| 712 vw | 717 w  | 711 | 21.4 | 2.9  | 707 | 22.6 | 15.9 | $\beta$ <sub>R</sub>                     |
|        | 703 w  | 696 | 4.2  | 0.7  | 691 | 0.9  | 2.4  | $\beta$ <sub>R</sub>                     |
|        |        | 689 | 0.4  | 3.6  | 672 | 1.2  | 1.7  | $\beta$ <sub>R</sub>                     |
|        | 678 w  | 670 | 4.1  | 0.5  | 669 | 3.7  | 0.8  | $\beta$ <sub>R</sub>                     |
|        |        | 668 | 2.3  | 5.3  | 663 | 2.8  | 2.0  | $\tau$ C1-C7                             |
|        |        | 662 | 0.2  | 3.1  | 648 | 10.0 | 9.7  | $\gamma$ C114-C117                       |
| 642 w  | 648 vw | 649 | 8.8  | 0.1  | 648 | 13.7 | 0.0  | $\beta$ <sub>R</sub>                     |
|        |        | 641 | 9.5  | 0.4  | 635 | 58.3 | 0.6  | $\beta$ <sub>R</sub>                     |
|        | 634 vw | 632 | 1.1  | 0.2  | 633 | 6.7  | 1.9  | $\tau$ C3-C4                             |
|        |        | 625 | 3.8  | 1.1  | 619 | 5.1  | 0.0  | $\tau$ C110-C111                         |
|        |        | 617 | 0.3  | 3.3  | 617 | 6.2  | 0.1  | $\tau$ C109-C115                         |
| 591 w  | 597 m  | 596 | 0.2  | 3.9  | 591 | 2.3  | 0.6  | $\beta$ <sub>R</sub>                     |
|        |        | 589 | 16.0 | 4.9  | 590 | 5.6  | 4.9  | $\beta$ <sub>R</sub>                     |
|        |        | 585 | 0.6  | 9.5  | 586 | 1.9  | 0.5  | $\beta$ <sub>R</sub>                     |
|        | 573 w  | 577 | 6.9  | 0.5  | 570 | 0.6  | 0.6  | $\tau$ C111-C112                         |
| 571 vw |        | 573 | 3.7  | 1.0  | 569 | 1.6  | 13.3 | $\beta$ <sub>R</sub>                     |
|        |        | 563 | 1.3  | 36.3 | 563 | 4.3  | 21.4 | $\beta$ <sub>R</sub>                     |
| 555 w  | 562 w  | 561 | 2.7  | 18.1 | 560 | 1.2  | 0.4  | $\beta$ <sub>R</sub>                     |
|        |        | 557 | 1.2  | 3.7  | 558 | 11.1 | 0.1  | $\beta$ <sub>R</sub>                     |
|        | 551 vw | 551 | 1.7  | 0.8  | 550 | 3.8  | 0.1  | $\tau$ C97-C99                           |
|        |        | 549 | 1.4  | 3.6  | 548 | 3.0  | 1.8  | $\beta$ <sub>R</sub>                     |
|        |        | 546 | 6.8  | 1.2  | 546 | 7.6  | 1.7  | $\beta$ <sub>R</sub>                     |
|        |        | 535 | 2.0  | 1.4  | 533 | 0.3  | 0.2  | $\tau$ C103-C105                         |

|        |        |     |     |      |     |      |      |                    |
|--------|--------|-----|-----|------|-----|------|------|--------------------|
|        |        | 533 | 3.2 | 1.3  | 526 | 2.4  | 3.7  | $\beta_R$          |
|        |        | 529 | 0.4 | 15.5 | 525 | 0.6  | 0.2  | $\beta_R$          |
|        |        | 525 | 3.2 | 16.2 | 524 | 4.7  | 6.3  | $\beta_R$          |
|        | 514 w  | 509 | 2.4 | 0.4  | 511 | 0.5  | 0.3  | $\beta_R$          |
|        |        | 506 | 0.4 | 6.7  | 505 | 0.2  | 16.2 | $\beta_R$          |
|        |        | 503 | 0.1 | 8.5  | 501 | 0.8  | 0.5  | $\tau_{C4-C6}$     |
|        |        | 500 | 2.4 | 3.7  | 500 | 1.0  | 10.7 | $\beta_R$          |
|        |        | 499 | 0.7 | 11.7 | 499 | 0.8  | 12.6 | $\beta_R$          |
|        |        | 490 | 0.4 | 28.5 | 493 | 1.9  | 2.3  | $\beta_R$          |
|        |        | 485 | 2.1 | 26.5 | 490 | 1.1  | 22.8 | $\beta_R$          |
|        |        | 472 | 0.6 | 7.5  | 473 | 7.6  | 3.7  | $\beta_R$          |
|        | 470 vw | 471 | 6.8 | 36.4 | 472 | 3.6  | 1.1  | $\beta_R$          |
| 466 vw |        | 467 | 1.2 | 3.6  | 469 | 0.2  | 5.6  | $\beta_R$          |
|        |        | 456 | 4.8 | 0.6  | 457 | 1.9  | 0.8  | $\beta_R$          |
| 452 vw |        | 454 | 8.3 | 3.5  | 456 | 11.0 | 1.4  | $\tau_{C96-C105}$  |
|        |        | 447 | 3.7 | 3.1  | 439 | 0.9  | 1.6  | $\beta_R$          |
|        |        | 438 | 0.5 | 3.0  | 436 | 0.3  | 0.2  | $\tau_{C4-C6}$     |
|        |        | 437 | 0.3 | 0.5  | 434 | 0.6  | 0.5  | $\tau_{C44-C45}$   |
|        |        | 435 | 0.8 | 3.0  | 433 | 1.7  | 1.1  | $\tau_{C109-C110}$ |
|        |        | 419 | 6.2 | 16.0 | 421 | 1.0  | 5.0  | $\beta_R$          |
|        |        | 415 | 2.6 | 7.3  | 418 | 4.2  | 4.7  | $\tau_{C9-C18}$    |
|        | 414 vw | 414 | 0.9 | 6.9  | 413 | 4.7  | 3.2  | $\tau_{C48-C51}$   |
|        |        | 413 | 0.7 | 11.4 | 411 | 0.3  | 0.1  | $\tau_{C6-C9}$     |
|        |        | 408 | 0.3 | 10.2 | 409 | 1.1  | 4.8  | $\tau_{C72-C75}$   |
|        |        | 398 | 1.1 | 56.2 | 408 | 0.1  | 1.4  | $\beta_R$          |
|        |        | 382 | 2.2 | 0.2  | 380 | 5.4  | 0.1  | $\beta_R$          |
|        |        | 379 | 2.9 | 11.4 | 379 | 4.7  | 0.8  | $\beta_R$          |
|        |        | 375 | 0.3 | 5.4  | 374 | 0.5  | 6.8  | $\tau_{C9-C10}$    |
|        |        | 372 | 2.2 | 0.1  | 362 | 0.6  | 0.3  | $\tau_{C75-C84}$   |
|        |        | 364 | 1.4 | 6.2  | 361 | 0.2  | 1.3  | $\tau_{C51-C52}$   |
|        | 332 vw | 359 | 0.0 | 0.3  | 358 | 1.1  | 1.1  | $\tau_{C117-C126}$ |
|        |        | 358 | 1.0 | 0.5  | 350 | 0.1  | 0.2  | $\tau_{C51-C56}$   |
|        |        | 353 | 6.1 | 0.6  | 348 | 1.9  | 0.1  | $\tau_{C110-C111}$ |
|        |        | 348 | 0.2 | 3.6  | 345 | 1.5  | 1.5  | $\tau_{C31-C33}$   |
|        |        | 342 | 0.8 | 8.4  | 341 | 2.0  | 4.5  | $\tau_{C109-C115}$ |
|        |        | 333 | 3.4 | 34.2 | 334 | 0.9  | 1.1  | $\tau_{C96-C105}$  |
|        |        | 332 | 4.3 | 24.7 | 330 | 11.2 | 0.6  | $\tau_{C96-C94}$   |
|        |        | 330 | 0.4 | 0.6  | 329 | 4.8  | 0.9  | $\tau_{C117-C126}$ |
|        |        | 327 | 0.4 | 0.1  | 325 | 1.9  | 0.1  | $\tau_{C75-C84}$   |
|        |        | 326 | 1.3 | 1.9  | 322 | 0.9  | 1.2  | $\tau_{C25-C32}$   |
|        |        | 322 | 0.8 | 5.1  | 320 | 1.1  | 0.7  | $\tau_{C51-C52}$   |
|        |        | 317 | 0.1 | 3.1  | 316 | 0.7  | 0.3  | $\tau_{C75-C84}$   |
|        |        | 316 | 0.1 | 35.7 | 314 | 0.4  | 0.9  | $\tau_{C9-C18}$    |
|        |        | 314 | 0.4 | 3.1  | 312 | 0.0  | 0.0  | $\tau_{C51-C52}$   |
|        |        | 313 | 0.1 | 14.1 | 309 | 0.1  | 11.6 | $\tau_{C117-C126}$ |
|        |        | 308 | 0.3 | 6.9  | 309 | 0.2  | 1.6  | $\tau_{C51-C60}$   |
|        |        | 305 | 1.6 | 2.4  | 306 | 0.1  | 6.9  | $\tau_{C9-C10}$    |
|        |        | 302 | 1.0 | 8.6  | 302 | 2.1  | 1.5  | $\tau_{C75-C76}$   |
|        |        | 301 | 0.3 | 0.2  | 301 | 0.5  | 2.7  | $\tau_{C75-C80}$   |
|        |        | 300 | 0.5 | 1.0  | 294 | 2.8  | 0.7  | $\tau_{C45-C64}$   |
|        |        | 283 | 1.8 | 0.2  | 282 | 2.6  | 29.8 | $\tau_{C6-C7}$     |
|        |        | 279 | 0.1 | 0.7  | 280 | 0.2  | 0.0  | $\tau_{C114-C117}$ |
|        | 271 vw | 274 | 0.3 | 20.2 | 273 | 0.4  | 0.1  | $\tau_{C94-C96}$   |
|        |        | 268 | 0.7 | 5.2  | 266 | 0.5  | 0.1  | $\tau_{C117-C122}$ |
|        |        | 262 | 0.4 | 0.4  | 264 | 0.6  | 0.1  | $\tau_{C9-C10}$    |
|        | 260 vw | 259 | 0.4 | 1.9  | 263 | 0.4  | 0.2  | $\tau_{C51-C60}$   |

|        |     |     |      |     |     |      |                  |
|--------|-----|-----|------|-----|-----|------|------------------|
|        | 255 | 0.3 | 12.8 | 260 | 0.1 | 0.8  | $\tau$ C9-C14    |
|        | 253 | 0.9 | 5.1  | 250 | 0.2 | 8.7  | $\tau$ C75-C76   |
|        | 248 | 0.1 | 7.6  | 245 | 0.2 | 1.4  | $\tau$ C75-C80   |
|        | 244 | 0.5 | 0.4  | 239 | 2.8 | 2.8  | $\tau$ C28-C30   |
|        | 233 | 0.9 | 0.4  | 235 | 0.8 | 7.1  | $\tau$ C48-C51   |
|        | 233 | 3.8 | 1.6  | 233 | 0.0 | 0.3  | $\tau$ C64-C67   |
|        | 230 | 0.3 | 0.2  | 230 | 0.1 | 0.1  | $\tau$ C117-C118 |
|        | 226 | 0.0 | 1.0  | 229 | 1.3 | 21.3 | $\tau$ C51-C60   |
|        | 224 | 0.1 | 0.7  | 227 | 0.4 | 13.2 | $\tau$ C9-C14    |
| 219 vw | 222 | 3.5 | 0.8  | 219 | 5.7 | 0.3  | $\tau$ C67-C68   |
|        | 221 | 0.2 | 0.9  | 215 | 2.9 | 4.1  | $\tau$ C75-C80   |
|        | 215 | 1.0 | 22.1 | 213 | 2.2 | 3.9  | $\tau$ C28-N133  |
|        | 210 | 0.6 | 46.1 | 208 | 1.1 | 2.6  | $\tau$ C91-N134  |
|        | 208 | 1.0 | 1.0  | 207 | 0.4 | 35.5 | $\tau$ C70-C72   |
|        | 206 | 1.1 | 0.2  | 204 | 0.4 | 26.4 | $\tau$ C72-C73   |
|        | 201 | 1.3 | 0.4  | 202 | 0.5 | 2.2  | $\tau$ C1-C130   |
|        | 191 | 3.4 | 0.5  | 191 | 9.8 | 20.1 | $\tau$ C94-C96   |
|        | 186 | 6.2 | 2.8  | 187 | 1.2 | 6.5  | $\tau$ C88-C91   |
|        | 178 | 1.7 | 0.3  | 181 | 2.8 | 1.3  | $\tau$ C22-O135  |
|        | 175 | 1.4 | 8.0  | 170 | 1.8 | 2.1  | $\tau$ C68-O140  |
|        | 172 | 1.2 | 14.0 | 165 | 0.6 | 0.1  | $\tau$ C43-C44   |
|        | 156 | 0.0 | 2.7  | 154 | 0.1 | 0.2  | $\tau$ C68-C69   |
|        | 145 | 2.7 | 18.2 | 146 | 0.3 | 9.9  | $\tau$ C88-C91   |
|        | 135 | 1.0 | 1.5  | 137 | 1.6 | 0.0  | $\tau$ C44-O138  |
|        | 133 | 1.0 | 1.9  | 135 | 0.4 | 3.2  | $\tau$ C25-N133  |
|        | 126 | 0.1 | 8.1  | 133 | 2.2 | 2.3  | $\tau$ C69-C70   |
| 121 m  | 123 | 0.5 | 1.9  | 123 | 1.1 | 5.4  | $\tau$ C47-C51   |
|        | 116 | 2.0 | 1.2  | 121 | 0.0 | 1.8  | $\tau$ C94-N134  |
|        | 108 | 0.5 | 2.6  | 113 | 0.2 | 0.5  | $\tau$ C110-C111 |
|        | 105 | 2.1 | 0.3  | 112 | 0.2 | 0.1  | $\tau$ C91-N134  |
|        | 104 | 0.6 | 1.5  | 106 | 0.4 | 3.0  | $\tau$ C44-C45   |
|        | 99  | 1.5 | 0.6  | 102 | 1.1 | 0.5  | $\tau$ C44-C45   |

---

Abbreviations: v: stretching;  $\delta$ : deformation in plane;  $\rho$ : deformation out of plane;  $\chi$ : torsion; as: antisymmetric; s: symmetric.



**Table S4.** For **4**, a comparison of experimental and calculated wavenumbers  $\nu$  (cm<sup>-1</sup>), intensity  $I$  (km/mol) of the bands in the IR spectra and relative intensity  $J$  (a.u.) of the lines in the Raman spectra of *exo-exo* and *endo-exo* rotamers.

| IR <sub>exp</sub> | Raman <sub>exp</sub> | <i>exo-exo</i> |       |      | <i>endo-exo</i> |                                          |     | Assignment                               |
|-------------------|----------------------|----------------|-------|------|-----------------|------------------------------------------|-----|------------------------------------------|
| $\nu$             | $\nu$                | $\nu$          | $I$   | $J$  | $\nu$           | $I$                                      | $J$ |                                          |
| 3389 m            |                      | 3466           | 340.3 | 2.2  | 3446            | 420.7                                    | 4.6 | vO2-H52                                  |
|                   |                      | 3435           | 403.8 | 3.5  | 3429            | 248.9                                    | 1.4 | vO1-H51                                  |
|                   |                      | 3146           | 0.1   | 0.4  | 3146            | 0.1                                      | 0.7 | vC14-H56                                 |
|                   |                      | 3144           | 0.6   | 0.6  | 3145            | 0.6                                      | 1.0 | vC9-H54                                  |
|                   |                      | 3140           | 13.9  | 8.2  | 3142            | 7.1                                      | 3.0 | vC131-H132                               |
|                   |                      | 3139           | 0.2   | 0.6  | 3141            | 0.2                                      | 1.8 | vC31-H60                                 |
|                   |                      | 3139           | 0.3   | 0.5  | 3141            | 0.2                                      | 2.6 | vC113-H114                               |
|                   |                      | 3136           | 9.3   | 4.6  | 3139            | 13.0                                     | 4.2 | vC26-H59                                 |
|                   |                      | 3133           | 1.0   | 1.9  | 3135            | 5.3                                      | 3.6 | vC135-H136                               |
|                   |                      | 3129           | 10.0  | 3.2  | 3132            | 8.0                                      | 1.8 | vC113-H114                               |
|                   |                      | 3124           | 1.8   | 0.9  | 3126            | 1.6                                      | 0.2 | vC17-H57                                 |
|                   |                      | 3120           | 3.0   | 0.4  | 3125            | 2.4                                      | 2.9 | vC11-H55                                 |
|                   |                      | 3116           | 2.4   | 1.6  | 3117            | 2.7                                      | 3.0 | vC19-H58                                 |
|                   |                      | 3116           | 3.6   | 1.0  | 3116            | 2.8                                      | 2.2 | vC6-H53                                  |
|                   |                      | 3114           | 4.6   | 1.6  | 3113            | 4.8                                      | 1.1 | vC133-H134                               |
|                   |                      | 3108           | 6.5   | 3.0  | 3110            | 5.3                                      | 0.4 | vC115-H116                               |
|                   |                      | 3103           | 0.6   | 1.1  | 3101            | 4.4                                      | 0.8 | vC112-H111                               |
|                   |                      | 3098           | 6.6   | 0.6  | 3096            | 5.1                                      | 0.3 | vC130-H129                               |
|                   |                      | 3059           | 12.4  | 2.1  | 3064            | 10.4                                     | 0.6 | vC49-H97 v <sub>as</sub> CH <sub>2</sub> |
|                   |                      | 3057           | 22.0  | 1.5  | 3057            | 24.0                                     | 1.2 | vC46-H88 v <sub>as</sub> CH <sub>3</sub> |
| 3059 w            | 3072 m               | 3056           | 29.8  | 2.0  | 3056            | 19.5                                     | 0.7 | vC42-H77 v <sub>as</sub> CH <sub>3</sub> |
|                   |                      | 3055           | 26.0  | 0.9  | 3056            | 26.0                                     | 0.5 | vC37-H62 v <sub>as</sub> CH <sub>3</sub> |
|                   |                      | 3055           | 12.7  | 0.9  | 3055            | 13.6                                     | 1.1 | vC43-H80 v <sub>as</sub> CH <sub>3</sub> |
|                   |                      | 3054           | 8.3   | 0.4  | 3054            | 24.2                                     | 0.8 | vC46-H89 v <sub>as</sub> CH <sub>3</sub> |
|                   |                      | 3054           | 24.5  | 1.0  | 3054            | 15.2                                     | 1.2 | vC39-H68 v <sub>as</sub> CH <sub>3</sub> |
|                   |                      | 3053           | 13.8  | 0.5  | 3053            | 18.5                                     | 1.2 | vC41-H75 v <sub>as</sub> CH <sub>3</sub> |
|                   |                      | 3052           | 71.1  | 4.5  | 3052            | 58.1                                     | 3.3 | vC43-H81 v <sub>as</sub> CH <sub>3</sub> |
|                   |                      | 3049           | 17.0  | 0.9  | 3050            | 20.8                                     | 0.5 | vC47-H91 v <sub>as</sub> CH <sub>3</sub> |
|                   |                      | 3048           | 78.6  | 2.0  | 3050            | 2.1                                      | 2.3 | vC38-H65 v <sub>as</sub> CH <sub>3</sub> |
|                   |                      | 3048           | 84.6  | 2.9  | 3049            | 67.7                                     | 1.8 | vC47-H93 v <sub>as</sub> CH <sub>3</sub> |
|                   |                      | 3048           | 13.7  | 1.1  | 3049            | 76.4                                     | 2.8 | vC45-H85 v <sub>as</sub> CH <sub>3</sub> |
|                   |                      | 3047           | 40.0  | 3.1  | 3048            | 10.8                                     | 0.2 | vC40-H70 v <sub>as</sub> CH <sub>3</sub> |
|                   |                      | 3046           | 14.1  | 1.1  | 3047            | 4.1                                      | 0.5 | vC43-H79 v <sub>as</sub> CH <sub>3</sub> |
|                   |                      | 3046           | 20.4  | 0.6  | 3047            | 39.1                                     | 0.5 | vC38-H65 v <sub>as</sub> CH <sub>3</sub> |
|                   |                      | 3046           | 47.1  | 0.7  | 3046            | 39.1                                     | 1.5 | vC41-H73 v <sub>as</sub> CH <sub>3</sub> |
|                   |                      | 3045           | 2.7   | 1.4  | 3046            | 47.0                                     | 1.9 | vC46-H88 v <sub>as</sub> CH <sub>3</sub> |
|                   |                      | 3042           | 3.2   | 0.3  | 3045            | 2.9                                      | 1.1 | vC48-H94 v <sub>as</sub> CH <sub>3</sub> |
|                   |                      | 3042           | 2.8   | 0.2  | 3043            | 2.8                                      | 0.4 | vC38-H64 v <sub>as</sub> CH <sub>3</sub> |
|                   |                      | 3041           | 1.6   | 0.7  | 3043            | 3.5                                      | 0.2 | vC44-H82 v <sub>s</sub> CH <sub>3</sub>  |
|                   |                      | 3041           | 5.7   | 0.3  | 3041            | 2.3                                      | 0.2 | vC39-H69 v <sub>s</sub> CH <sub>3</sub>  |
| 3040              | 3.4                  | 0.3            | 3041  | 0.9  | 0.1             | vC42-H76 v <sub>as</sub> CH <sub>3</sub> |     |                                          |
| 3040              | 4.1                  | 0.2            | 3041  | 8.5  | 0.1             | vC43-H79 v <sub>as</sub> CH <sub>3</sub> |     |                                          |
| 3028              | 13.0                 | 0.4            | 3040  | 2.8  | 0.3             | vC41-H73 v <sub>as</sub> CH <sub>3</sub> |     |                                          |
| 3012              | 22.2                 | 4.7            | 3031  | 10.0 | 0.6             | vC50-H99 v <sub>as</sub> CH <sub>2</sub> |     |                                          |
| 3002              | 5.9                  | 4.2            | 2993  | 34.5 | 3.8             | vC49-H98 v <sub>as</sub> CH <sub>2</sub> |     |                                          |

|         |         |      |       |      |      |       |       |                                            |
|---------|---------|------|-------|------|------|-------|-------|--------------------------------------------|
|         |         | 3000 | 25.2  | 1.3  | 2983 | 29.4  | 4.6   | vC101-H103 v <sub>as</sub> CH <sub>2</sub> |
|         |         | 2991 | 10.8  | 0.8  | 2978 | 19.7  | 3.2   | vC46-H88 v <sub>s</sub> CH <sub>3</sub>    |
|         |         | 2976 | 21.5  | 25.6 | 2978 | 13.7  | 3.7   | vC119-H120 v <sub>s</sub> CH <sub>2</sub>  |
|         |         | 2973 | 20.6  | 78.3 | 2973 | 26.2  | 20.5  | vC38-H64 v <sub>s</sub> CH <sub>3</sub>    |
|         |         | 2973 | 49.4  | 4.8  | 2973 | 37.7  | 9.0   | vC44-H82 v <sub>s</sub> CH <sub>3</sub>    |
|         |         | 2972 | 18.8  | 6.5  | 2972 | 21.5  | 7.7   | vC42-H76 v <sub>s</sub> CH <sub>3</sub>    |
|         |         | 2970 | 17.0  | 2.4  | 2971 | 18.2  | 1.6   | vC46-H88 v <sub>s</sub> CH <sub>3</sub>    |
|         |         | 2969 | 22.5  | 2.3  | 2969 | 9.6   | 1.9   | vC47-H91 v <sub>s</sub> CH <sub>3</sub>    |
|         |         | 2968 | 16.8  | 1.2  | 2968 | 19.9  | 0.8   | vC38-H65 v <sub>s</sub> CH <sub>3</sub>    |
|         |         | 2966 | 21.7  | 0.8  | 2967 | 20.5  | 1.9   | vC106-H105                                 |
|         |         | 2966 | 19.2  | 2.9  | 2967 | 23.6  | 2.9   | vC45-H85 v <sub>s</sub> CH <sub>3</sub>    |
|         |         | 2966 | 9.2   | 1.4  | 2966 | 17.5  | 0.5   | vC39-H67 v <sub>s</sub> CH <sub>3</sub>    |
|         |         | 2966 | 53.8  | 7.6  | 2966 | 24.2  | 1.3   | vC42-H76 v <sub>s</sub> CH <sub>3</sub>    |
|         |         | 2965 | 7.2   | 1.8  | 2965 | 22.9  | 0.8   | vC40-H70 v <sub>s</sub> CH <sub>3</sub>    |
|         |         | 2965 | 17.3  | 10.2 | 2964 | 18.7  | 2.2   | vC41-H74 v <sub>s</sub> CH <sub>3</sub>    |
| 2962 s  | 2964 m  | 2947 | 34.0  | 17.5 | 2948 | 24.6  | 1.6   | vC50-H100 v <sub>s</sub> CH <sub>2</sub>   |
|         |         | 2941 | 24.6  | 2.1  | 2944 | 27.5  | 2.7   | vC124-H123                                 |
| 2906 m  | 2932 m  | 2930 | 33.7  | 2.6  | 2919 | 45.7  | 3.6   | vC101-H103 v <sub>s</sub> CH <sub>2</sub>  |
| 2870 m  | 2909 m  | 2907 | 10.1  | 9.8  | 2917 | 17.3  | 1.1   | vC119-H121                                 |
|         | 2782 vw | 2832 | 561.9 | 38.3 | 2786 | 525.6 | 11.1  | vO126-H125                                 |
|         | 2716 vw | 2616 | 617.0 | 14.4 | 2691 | 691.1 | 27.1  | vO108-H107                                 |
|         |         | 1651 | 150.5 | 11.8 | 1645 | 74.4  | 19.2  | vC106=N104                                 |
| 1634 s  | 1639 s  | 1633 | 108.3 | 29.2 | 1641 | 66.8  | 8.8   | vC124=N122                                 |
|         |         | 1631 | 260.1 | 46.2 | 1635 | 301.4 | 39.1  | vC127-C128                                 |
|         |         | 1629 | 164.8 | 72.7 | 1633 | 252.0 | 40.6  | vC106-C110                                 |
| 1582 m  | 1588 m  | 1597 | 27.2  | 1.6  | 1598 | 23.9  | 26.0  | vC110-C112                                 |
|         |         | 1589 | 49.3  | 9.7  | 1594 | 32.2  | 9.0   | vC133-C135                                 |
|         |         | 1577 | 6.5   | 26.4 | 1575 | 7.6   | 9.0   | vC19-C24                                   |
|         |         | 1575 | 5.6   | 13.9 | 1574 | 1.2   | 4.2   | vC5-C6                                     |
|         | 1567 w  | 1571 | 11.1  | 26.3 | 1569 | 5.2   | 13.3  | vC11-C12                                   |
|         | 1556 sh | 1564 | 7.7   | 12.2 | 1562 | 8.3   | 3.5   | vC14-C15                                   |
| 1554 vw |         | 1532 | 9.5   | 7.7  | 1533 | 13.3  | 20.9  | vC28-C31                                   |
|         |         | 1529 | 3.6   | 25.9 | 1532 | 7.1   | 12.6  | vC18-C27                                   |
|         |         | 1523 | 10.5  | 8.4  | 1525 | 23.5  | 6.4   | vC13-C14                                   |
| 1494 m  |         | 1519 | 13.6  | 3.1  | 1521 | 5.3   | 3.2   | vC3-C12                                    |
| 1477 m  |         | 1517 | 37.1  | 10.6 | 1516 | 46.9  | 10.6  | vC113-C115                                 |
|         |         | 1507 | 74.8  | 22.5 | 1512 | 44.4  | 9.6   | vC131-C133                                 |
|         |         | 1475 | 5.2   | 2.0  | 1475 | 6.2   | 0.2   | βC38-H65 δ <sub>s</sub> CH <sub>3</sub>    |
|         |         | 1474 | 60.3  | 1.0  | 1474 | 53.6  | 0.7   | βC41-H75 δ <sub>s</sub> CH <sub>3</sub>    |
|         |         | 1473 | 25.7  | 0.5  | 1474 | 17.8  | 0.3   | βC43-H79 δ <sub>s</sub> CH <sub>3</sub>    |
|         | 1466 m  | 1472 | 27.8  | 1.0  | 1473 | 30.8  | 0.8   | βC46-H89 δ <sub>s</sub> CH <sub>3</sub>    |
|         |         | 1460 | 4.5   | 0.7  | 1465 | 17.3  | 2.9   | βC38-H64 δ <sub>s</sub> CH <sub>3</sub>    |
|         |         | 1459 | 5.8   | 1.2  | 1462 | 7.2   | 0.8   | βC45-H85 δ <sub>s</sub> CH <sub>3</sub>    |
|         |         | 1459 | 10.6  | 0.8  | 1459 | 6.3   | 0.5   | βC40-H70 δ <sub>s</sub> CH <sub>3</sub>    |
|         |         | 1459 | 6.5   | 0.8  | 1459 | 8.0   | 0.5   | βC47-H91 δ <sub>s</sub> CH <sub>3</sub>    |
|         |         | 1458 | 78.1  | 80.0 | 1459 | 14.3  | 1.7   | vC127-C135                                 |
|         |         | 1458 | 29.0  | 7.3  | 1457 | 64.1  | 100.0 | βC41-H73 δ <sub>s</sub> CH <sub>3</sub>    |
|         |         | 1457 | 44.5  | 36.2 | 1457 | 18.0  | 49.2  | βC44-H84 δ <sub>s</sub> CH <sub>3</sub>    |
|         |         | 1456 | 6.5   | 0.9  | 1456 | 36.6  | 81.0  | vC109-O108                                 |
|         |         | 1456 | 23.9  | 2.9  | 1456 | 10.6  | 86.0  | βC48-H94 δ <sub>s</sub> CH <sub>3</sub>    |
|         |         | 1455 | 28.7  | 23.7 | 1456 | 7.1   | 10.1  | βC39-H67 δ <sub>s</sub> CH <sub>3</sub>    |
|         |         | 1454 | 32.0  | 2.7  | 1455 | 1.3   | 1.7   | βC41-H73 δ <sub>s</sub> CH <sub>3</sub>    |

|         |         |         |        |       |      |       |                                              |                                              |                                            |
|---------|---------|---------|--------|-------|------|-------|----------------------------------------------|----------------------------------------------|--------------------------------------------|
| 1450 m  | 1449 sh | 1453    | 17.4   | 13.8  | 1451 | 29.6  | 15.2                                         | $\beta$ C49-H97 $\delta_s$ CH <sub>2</sub>   |                                            |
|         |         | 1451    | 55.3   | 2.3   | 1449 | 83.7  | 4.8                                          | $\beta$ C50-H99 $\delta_s$ CH <sub>2</sub>   |                                            |
|         |         | 1443    | 6.8    | 1.6   | 1443 | 17.4  | 1.0                                          | $\beta$ C49-H98 $\delta_s$ CH <sub>2</sub>   |                                            |
|         |         | 1442    | 8.5    | 0.3   | 1442 | 6.8   | 1.8                                          | $\beta$ C38-H65 $\delta_s$ CH <sub>3</sub>   |                                            |
|         |         | 1440    | 13.5   | 5.8   | 1440 | 2.4   | 0.9                                          | $\beta$ C46-H90 $\delta_s$ CH <sub>3</sub>   |                                            |
|         |         | 1440    | 1.6    | 0.9   | 1440 | 13.8  | 0.3                                          | vC115-C117                                   |                                            |
|         |         | 1440    | 5.4    | 1.5   | 1440 | 14.4  | 5.9                                          | $\beta$ C41-H75 $\delta_s$ CH <sub>3</sub>   |                                            |
|         |         | 1439    | 8.6    | 2.1   | 1439 | 11.1  | 1.3                                          | $\beta$ C43-H81 $\delta_s$ CH <sub>3</sub>   |                                            |
|         |         | 1438    | 0.3    | 1.0   | 1438 | 4.6   | 0.8                                          | $\beta$ C37-H63 $\delta_s$ CH <sub>3</sub>   |                                            |
|         |         | 1437 w  | 1437   | 0.2   | 0.4  | 1438  | 12.7                                         | 6.1                                          | $\beta$ C41-H75 $\delta_s$ CH <sub>3</sub> |
|         |         |         | 1437   | 0.2   | 1.1  | 1437  | 0.3                                          | 0.4                                          | $\beta$ C44-H84 $\delta_s$ CH <sub>3</sub> |
|         |         |         | 1436   | 0.3   | 0.4  | 1437  | 0.4                                          | 0.8                                          | vC128-C130                                 |
|         |         |         | 1434   | 39.9  | 12.0 | 1437  | 0.5                                          | 0.5                                          | $\beta$ C46-H89 $\delta_s$ CH <sub>3</sub> |
|         |         |         | 1433   | 0.1   | 0.0  | 1434  | 85.2                                         | 2.9                                          | $\beta$ C39-H67 $\delta_s$ CH <sub>3</sub> |
| 1432    | 17.1    |         | 9.0    | 1433  | 1.0  | 0.0   | $\beta$ C41-H73 $\delta_s$ CH <sub>3</sub>   |                                              |                                            |
| 1432    | 0.1     |         | 0.1    | 1432  | 0.1  | 0.1   | $\beta$ C45-H85 $\delta_s$ CH <sub>2</sub>   |                                              |                                            |
| 1432    | 0.1     |         | 0.2    | 1432  | 0.2  | 0.1   | $\beta$ C39-H69 $\delta_s$ CH <sub>3</sub>   |                                              |                                            |
| 1431    | 0.1     |         | 0.1    | 1431  | 24.9 | 0.1   | $\beta$ C101-H102 $\delta_s$ CH <sub>2</sub> |                                              |                                            |
| 1392 m  | 1401 w  |         | 1426   | 127.4 | 21.0 | 1425  | 32.4                                         | 1.6                                          | vC21-C22                                   |
|         |         | 1417    | 28.8   | 3.0   | 1420 | 46.6  | 1.4                                          | $\beta$ C49-H97 $\delta_s$ CH <sub>2</sub>   |                                            |
|         |         | 1416    | 87.9   | 4.6   | 1416 | 57.6  | 3.7                                          | $\beta$ C119-H120 $\delta_s$ CH <sub>2</sub> |                                            |
|         |         | 1380    | 2.0    | 0.4   | 1379 | 3.1   | 0.3                                          | $\beta$ C39-H67 $\delta_s$ CH <sub>3</sub>   |                                            |
|         |         | 1377    | 6.6    | 3.9   | 1378 | 1.2   | 2.2                                          | $\beta$ C47-H93 $\delta_s$ CH <sub>3</sub>   |                                            |
|         |         | 1377    | 1.9    | 1.6   | 1378 | 7.9   | 0.0                                          | $\beta$ C45-H85 $\delta_s$ CH <sub>3</sub>   |                                            |
|         |         | 1377    | 4.4    | 1.9   | 1377 | 9.5   | 2.4                                          | $\beta$ C40-H70 $\delta_s$ CH <sub>3</sub>   |                                            |
|         |         | 1375    | 21.7   | 4.4   | 1376 | 7.5   | 0.4                                          | vC26-C27                                     |                                            |
|         |         | 1374    | 8.9    | 2.7   | 1375 | 10.7  | 0.5                                          | vC19-C24                                     |                                            |
|         |         | 1367    | 8.0    | 5.2   | 1369 | 34.8  | 0.9                                          | $\beta$ C119-H120 wag CH <sub>2</sub>        |                                            |
| 1364 m  | 1368 vw | 1365    | 8.2    | 3.1   | 1367 | 20.2  | 0.7                                          | vC10-C11                                     |                                            |
|         |         | 1364    | 25.0   | 2.6   | 1365 | 19.4  | 1.8                                          | vC13-C17                                     |                                            |
|         |         | 1363    | 22.8   | 6.6   | 1363 | 16.6  | 0.2                                          | $\beta$ C101-H102 wag CH <sub>2</sub>        |                                            |
|         |         | 1357    | 39.6   | 7.1   | 1354 | 13.0  | 6.4                                          | $\beta$ C50-H100 wag CH <sub>2</sub>         |                                            |
|         |         | 1351    | 19.9   | 17.3  | 1354 | 18.1  | 13.0                                         | vC109-C110                                   |                                            |
|         |         | 1351    | 15.0   | 12.5  | 1350 | 9.9   | 16.0                                         | vC127-C128                                   |                                            |
|         |         | 1346    | 70.3   | 48.2  | 1349 | 7.8   | 11.9                                         | $\beta$ O1-H51                               |                                            |
|         |         | 1346    | 18.9   | 20.2  | 1346 | 71.5  | 40.7                                         | $\beta$ C39-H67 $\delta_s$ CH <sub>3</sub>   |                                            |
|         |         | 1345    | 35.4   | 4.1   | 1344 | 4.3   | 1.1                                          | $\beta$ C40-H70 $\delta_s$ CH <sub>3</sub>   |                                            |
|         |         | 1343    | 2.8    | 0.3   | 1344 | 6.7   | 1.2                                          | $\beta$ C48-H95 $\delta_s$ CH <sub>3</sub>   |                                            |
|         |         | 1342 vw | 1343   | 5.8   | 2.5  | 1343  | 2.0                                          | 1.4                                          | $\beta$ C37-H63 $\delta_s$ CH <sub>3</sub> |
|         |         |         | 1343   | 8.2   | 0.2  | 1343  | 23.3                                         | 4.4                                          | $\beta$ C43-H79 $\delta_s$ CH <sub>3</sub> |
|         |         |         | 1341   | 4.3   | 1.3  | 1342  | 23.2                                         | 5.6                                          | $\beta$ C41-H73 $\delta_s$ CH <sub>3</sub> |
|         |         |         | 1338 w | 1341  | 29.2 | 0.9   | 1340                                         | 6.2                                          | 6.7                                        |
| 1339    | 35.9    | 3.3     |        | 1340  | 29.0 | 22.4  | $\beta$ C40-H72 $\delta_s$ CH <sub>3</sub>   |                                              |                                            |
| 1339    | 6.0     | 1.2     |        | 1339  | 7.6  | 11.5  | $\beta$ C43-H79 $\delta_s$ CH <sub>3</sub>   |                                              |                                            |
| 1321 sh | 1322 m  | 1338    | 30.5   | 1.0   | 1338 | 9.9   | 2.9                                          | $\beta$ C49-H98 wag CH <sub>2</sub>          |                                            |
|         |         | 1324    | 50.3   | 8.7   | 1321 | 43.9  | 3.2                                          | $\beta$ C101-H103 wag CH <sub>2</sub>        |                                            |
|         |         | 1321    | 23.7   | 8.0   | 1316 | 21.0  | 4.3                                          | $\beta$ C119-H120 wag CH <sub>2</sub>        |                                            |
|         |         | 1305    | 3.8    | 6.7   | 1311 | 9.5   | 15.4                                         | vO126-C127                                   |                                            |
|         |         | 1304    | 12.6   | 100.0 | 1304 | 39.7  | 33.8                                         | vC15-C22                                     |                                            |
|         | 1287 m  | 1303    | 35.9   | 3.0   | 1302 | 28.1  | 14.6                                         | vC109-O108                                   |                                            |
| 1280 m  |         | 1298    | 55.6   | 37.8  | 1301 | 3.2   | 6.5                                          | vC3-O20                                      |                                            |
| 1263 sh | 1261 sh | 1291    | 4.4    | 16.1  | 1287 | 5.9   | 3.0                                          | vC18-O2                                      |                                            |
|         |         | 1288    | 6.3    | 7.7   | 1286 | 2.2   | 3.5                                          | vC31-C32                                     |                                            |
|         |         | 1270    | 9.0    | 5.1   | 1253 | 152.7 | 79.9                                         | $\beta$ C6-H53                               |                                            |
|         |         | 1250    | 298.8  | 3.5   | 1251 | 27.7  | 9.7                                          | $\beta$ C119-H121 wag CH <sub>2</sub>        |                                            |

|         |         |      |       |      |      |                                        |                                          |                                        |
|---------|---------|------|-------|------|------|----------------------------------------|------------------------------------------|----------------------------------------|
| 1246 m  | 1249 m  | 1249 | 3.0   | 7.7  | 1247 | 71.6                                   | 5.5                                      | $\beta$ C101-H103 wag CH <sub>2</sub>  |
|         |         | 1245 | 43.2  | 8.6  | 1246 | 6.9                                    | 7.7                                      | $\beta$ C26-H59                        |
|         |         | 1242 | 30.4  | 10.5 | 1242 | 75.3                                   | 3.0                                      | vC13-C36                               |
|         |         | 1239 | 134.8 | 0.7  | 1241 | 47.7                                   | 7.0                                      | vC33-C39                               |
|         |         | 1238 | 8.6   | 0.3  | 1237 | 2.3                                    | 3.0                                      | vC28-C35                               |
| 1223 vw | 1224 m  | 1236 | 16.9  | 3.7  | 1237 | 79.8                                   | 0.6                                      | vC5-C34                                |
|         |         | 1235 | 15.6  | 18.7 | 1235 | 3.5                                    | 10.5                                     | vC109-O108                             |
|         | 1229    | 11.4 | 39.6  | 1233 | 5.2  | 11.6                                   | $\beta$ C130-H129                        |                                        |
| 1205 vw | 1210 sh | 1224 | 108.1 | 6.9  | 1217 | 110.2                                  | 1.7                                      | vC106-C110                             |
|         |         | 1215 | 26.9  | 16.9 | 1212 | 25.6                                   | 25.5                                     | vC49-O20                               |
|         | 1212    | 46.5 | 13.4  | 1210 | 37.8 | 31.0                                   | $\beta$ C119-H120 $\rho$ CH <sub>2</sub> |                                        |
|         | 1203    | 9.9  | 1.8   | 1204 | 20.4 | 1.3                                    | vC21-O4                                  |                                        |
|         | 1202    | 6.6  | 1.4   | 1202 | 1.2  | 0.9                                    | vC109-C117                               |                                        |
|         | 1199    | 5.9  | 0.91  | 1199 | 0.5  | 0.6                                    | vC124-C128                               |                                        |
|         | 1197    | 0.9  | 4.8   | 1197 | 1.9  | 0.3                                    | C33-C37                                  |                                        |
|         | 1194    | 3.6  | 9.4   | 1195 | 19.0 | 1.2                                    | C36-C46                                  |                                        |
|         | 1194    | 0.1  | 1.1   | 1194 | 0.1  | 2.2                                    | vC35-C43                                 |                                        |
|         | 1190    | 30.1 | 3.4   | 1193 | 24.5 | 9.0                                    | vC34-C41                                 |                                        |
|         | 1189    | 2.5  | 2.4   | 1189 | 4.3  | 0.9                                    | vC33-C38                                 |                                        |
|         | 1188    | 6.9  | 2.2   | 1189 | 7.3  | 0.5                                    | vC35-C45                                 |                                        |
|         | 1167 w  |      | 1188  | 3.7  | 0.7  | 1189                                   | 8.0                                      | 1.5                                    |
| 1188    |         |      | 7.4   | 4.6  | 1188 | 3.3                                    | 0.6                                      | vC36-C47                               |
| 1186    |         |      | 5.2   | 1.1  | 1186 | 2.3                                    | 0.3                                      | vC10-C33                               |
| 1186    |         |      | 3.8   | 0.7  | 1186 | 0.8                                    | 1.0                                      | vC36-C47                               |
| 1148    |         |      | 47.5  | 4.2  | 1152 | 38.2                                   | 31.8                                     | $\beta$ C31-H60                        |
| 1151 w  | 1155 vw | 1145 | 6.6   | 11.0 | 1144 | 66.4                                   | 8.6                                      | $\beta$ C26-H59                        |
|         | 1141 sh | 1139 | 17.3  | 2.1  | 1142 | 8.6                                    | 13.7                                     | $\beta$ C135-H136                      |
|         |         | 1137 | 64.1  | 1.5  | 1141 | 8.8                                    | 5.7                                      | $\beta$ C117-H118                      |
| 1122 w  |         | 1126 | 0.1   | 5.4  | 1126 | 2.0                                    | 2.4                                      | vC9-C10                                |
|         |         | 1118 | 2.1   | 12.0 | 1118 | 1.6                                    | 22.0                                     | vC14-C15                               |
|         |         | 1117 | 2.7   | 4.9  | 1117 | 1.5                                    | 6.8                                      | vC19-C28                               |
| 1093 w  | 1099 vw | 1115 | 11.5  | 1.7  | 1115 | 11.1                                   | 1.1                                      | vC5-C26                                |
|         |         | 1115 | 7.4   | 0.8  | 1114 | 27.6                                   | 0.1                                      | vC112-C113                             |
|         |         | 1110 | 14.1  | 1.3  | 1114 | 0.4                                    | 2.6                                      | vC130-C131                             |
| 1079 sh |         | 1087 | 16.5  | 1.2  | 1092 | 4.8                                    | 0.6                                      | vC101-N104                             |
|         |         | 1086 | 15.9  | 1.1  | 1089 | 14.1                                   | 0.6                                      | vC119-N122                             |
|         |         | 1066 | 45.8  | 2.9  | 1066 | 46.8                                   | 4.1                                      | vC50-C119                              |
|         |         | 1060 | 7.9   | 4.3  | 1059 | 2.5                                    | 0.4                                      | vC8-S25                                |
|         |         | 1059 | 4.2   | 6.0  | 1057 | 3.4                                    | 48.4                                     | vC32-S29                               |
| 1029 m  | 1049 sh | 1057 | 4.5   | 1.7  | 1054 | 20.7                                   | 3.6                                      | vC15-S16                               |
|         |         | 1048 | 28.2  | 1.6  | 1048 | 19.5                                   | 6.8                                      | vC22-S23                               |
|         | 1036 m  | 1045 | 20.6  | 2.0  | 1047 | 11.5                                   | 4.9                                      | vC49-C101                              |
|         |         | 1030 | 25.7  | 15.1 | 1025 | 6.9                                    | 1.4                                      | vC50-O4                                |
|         |         | 1029 | 25.6  | 36.0 | 1025 | 23.9                                   | 2.4                                      | vC113-C115                             |
| 1029 m  |         | 1023 | 5.6   | 6.1  | 1021 | 28.2                                   | 0.9                                      | vC130-C131                             |
|         |         | 1017 | 1.3   | 1.7  | 1016 | 0.1                                    | 0.1                                      | vC49-O20                               |
|         |         | 1017 | 121.6 | 0.2  | 1014 | 0.2                                    | 0.2                                      | $\beta$ C39-H67 $\rho$ CH <sub>3</sub> |
|         |         | 1016 | 0.1   | 2.2  | 1014 | 1.1                                    | 0.1                                      | $\beta$ C46-H88 $\rho$ CH <sub>3</sub> |
|         |         | 1015 | 0.2   | 0.7  | 1014 | 0.1                                    | 0.2                                      | $\beta$ C42-H77 $\rho$ CH <sub>3</sub> |
|         |         | 1014 | 0.1   | 0.4  | 1012 | 93.8                                   | 4.4                                      | $\beta$ C43-H79 $\rho$ CH <sub>3</sub> |
|         |         | 1013 | 118.5 | 1.8  | 1011 | 0.2                                    | 1.2                                      | $\beta$ C38-H65 $\rho$ CH <sub>3</sub> |
|         |         | 1012 | 7.9   | 4.5  | 1010 | 5.6                                    | 3.1                                      | $\beta$ C47-H91 $\rho$ CH <sub>3</sub> |
| 1010    | 9.9     | 3.0  | 1010  | 0.6  | 5.6  | $\beta$ C40-H70 $\rho$ CH <sub>3</sub> |                                          |                                        |

|        |        |      |      |      |      |      |      |                                         |
|--------|--------|------|------|------|------|------|------|-----------------------------------------|
| 999 w  |        | 1009 | 0.5  | 2.8  | 1009 | 0.5  | 1.0  | $\beta$ C45-H87 $\rho$ CH <sub>2</sub>  |
| 975 vw | 973 w  | 1009 | 0.5  | 4.2  | 988  | 96.7 | 2.3  | $\beta$ O108-H107                       |
|        |        | 970  | 17.6 | 14.9 | 961  | 22.3 | 0.6  | $\beta$ C106-H105                       |
|        |        | 964  | 0.7  | 0.1  | 959  | 33.2 | 0.2  | $\gamma$ C131-H132                      |
|        |        | 958  | 12.1 | 0.5  | 958  | 9.2  | 0.5  | $\gamma$ C115-H116                      |
| 935 sh | 937 sh | 956  | 1.7  | 2.7  | 955  | 4.8  | 0.7  | $\gamma$ C124-H123                      |
|        |        | 946  | 38.3 | 0.4  | 954  | 67.5 | 3.5  | $\beta$ O126-H125                       |
|        |        | 933  | 16.0 | 6.8  | 929  | 0.1  | 0.2  | $\beta$ C37-H63 $\rho$ CH <sub>3</sub>  |
|        |        | 930  | 0.2  | 0.1  | 929  | 0.1  | 0.1  | $\beta$ C46-H89 $\rho$ CH <sub>3</sub>  |
|        |        | 928  | 0.3  | 0.0  | 929  | 0.2  | 1.0  | $\beta$ C41-H75 $\rho$ CH <sub>3</sub>  |
| 924 w  | 920 w  | 927  | 0.1  | 0.0  | 928  | 0.1  | 0.2  | $\beta$ C43-H80 $\rho$ CH <sub>3</sub>  |
|        |        | 927  | 0.1  | 0.1  | 920  | 19.1 | 0.7  | $\gamma$ C112-H111                      |
|        |        | 920  | 4.3  | 3.2  | 918  | 27.7 | 2.4  | $\gamma$ C130-H129                      |
|        |        | 920  | 2.6  | 1.6  | 918  | 1.4  | 0.1  | vC33-C37                                |
|        |        | 919  | 0.4  | 0.2  | 918  | 2.7  | 1.5  | vC36-C47                                |
|        |        | 918  | 8.8  | 0.5  | 918  | 2.0  | 1.0  | vC34-C40                                |
|        |        | 917  | 2.2  | 0.8  | 917  | 5.8  | 0.7  | vC35-C45                                |
|        |        | 917  | 2.1  | 0.6  | 911  | 18.9 | 3.2  | $\beta$ C49-H97 $\rho$ CH <sub>2</sub>  |
|        |        | 911  | 31.0 | 2.9  | 910  | 16.8 | 0.8  | $\beta$ C50-H100 $\rho$ CH <sub>2</sub> |
|        | 905 w  | 909  | 1.7  | 1.6  | 909  | 3.7  | 2.4  | vC36-C48                                |
|        |        | 907  | 1.2  | 1.8  | 907  | 0.8  | 0.5  | vC33-C39                                |
|        | 891 sh | 906  | 2.1  | 1.0  | 907  | 1.8  | 1.5  | $\beta$ C43-H81 $\rho$ CH <sub>3</sub>  |
|        |        | 906  | 1.6  | 0.6  | 906  | 1.7  | 0.8  | $\beta$ C42-H78 $\rho$ CH <sub>3</sub>  |
|        |        | 899  | 19.6 | 10.6 | 893  | 6.4  | 3.6  | vC10-C11                                |
| 885 w  |        | 893  | 5.1  | 8.3  | 889  | 0.9  | 0.4  | vC124-C128                              |
|        |        | 889  | 0.9  | 2.7  | 888  | 6.7  | 4.3  | $\gamma$ C11-H55                        |
|        |        | 887  | 0.9  | 0.3  | 888  | 0.6  | 28.8 | $\gamma$ C26-H59                        |
|        | 877 sh | 886  | 0.6  | 2.8  | 886  | 0.9  | 4.4  | $\gamma$ C19-H58                        |
| 874 w  |        | 884  | 1.7  | 7.7  | 883  | 1.2  | 47.8 | $\gamma$ C31-H60                        |
|        |        | 883  | 6.3  | 5.4  | 882  | 6.5  | 1.4  | $\gamma$ C11-H55                        |
|        |        | 877  | 3.7  | 3.2  | 878  | 1.0  | 0.9  | $\gamma$ C14-H56                        |
|        |        | 876  | 6.8  | 1.4  | 877  | 5.5  | 1.6  | vC131-C133                              |
|        |        | 868  | 11.3 | 12.6 | 869  | 11.7 | 6.3  | vC49-C101                               |
|        | 858 vw | 868  | 0.2  | 0.8  | 866  | 9.2  | 2.4  | $\gamma$ C9-H54                         |
|        |        | 865  | 10.5 | 1.3  | 864  | 8.9  | 1.6  | $\gamma$ C6-H53                         |
|        |        | 864  | 13.2 | 7.3  | 859  | 4.1  | 1.1  | $\gamma$ C26-H59                        |
|        |        | 862  | 6.6  | 1.3  | 858  | 14.3 | 5.3  | vC33-C39                                |
|        | 830 m  | 856  | 54.8 | 5.7  | 853  | 38.4 | 1.4  | $\gamma$ C17-H57                        |
| 823 w  |        | 854  | 12.4 | 9.8  | 848  | 10.1 | 3.5  | vC36-C48                                |
|        |        | 844  | 4.1  | 0.1  | 837  | 10.0 | 0.2  | $\gamma$ C135-H136                      |
|        | 813 w  | 839  | 2.1  | 0.2  | 837  | 7.5  | 0.2  | $\gamma$ C112-H111                      |
| 811 vw |        | 814  | 11.0 | 13.6 | 813  | 7.0  | 15.8 | vC34-C42                                |
|        |        | 813  | 17.7 | 13.5 | 813  | 24.9 | 1.9  | vC30-O1                                 |
| 794 sh |        | 799  | 8.1  | 1.2  | 799  | 11.0 | 2.6  | vC21-O4                                 |
|        |        | 797  | 7.3  | 19.4 | 797  | 9.4  | 8.7  | vC49-O20                                |
| 781 w  | 787 m  | 774  | 4.7  | 1.0  | 774  | 3.4  | 3.8  | $\beta$ <sub>R</sub>                    |
|        |        | 773  | 2.3  | 2.0  | 773  | 6.4  | 24.4 | $\beta$ <sub>R</sub>                    |
|        |        | 773  | 1.8  | 17.9 | 773  | 3.3  | 1.1  | $\beta$ <sub>R</sub>                    |
|        |        | 772  | 8.0  | 3.2  | 771  | 5.5  | 3.8  | $\beta$ <sub>R</sub>                    |
|        |        | 765  | 14.3 | 1.1  | 762  | 10.1 | 0.7  | $\beta$ <sub>R</sub>                    |
| 755 m  |        | 763  | 0.4  | 2.6  | 759  | 13.9 | 2.2  | $\beta$ <sub>R</sub>                    |
|        |        | 755  | 6.4  | 4.0  | 756  | 2.0  | 6.3  | $\beta$ <sub>R</sub>                    |
|        |        | 748  | 28.2 | 0.5  | 755  | 16.2 | 5.1  | $\beta$ <sub>R</sub>                    |
|        |        | 745  | 5.8  | 1.0  | 743  | 23.2 | 0.3  | $\beta$ <sub>R</sub>                    |
| 736 sh |        | 742  | 21.1 | 0.3  | 741  | 22.2 | 0.5  | $\beta$ <sub>R</sub>                    |

|        |        |        |       |      |     |                  |           |                    |                   |                 |
|--------|--------|--------|-------|------|-----|------------------|-----------|--------------------|-------------------|-----------------|
| 720 w  | 725 vw | 737    | 17.6  | 1.2  | 736 | 17.4             | 2.7       | $\gamma$ C18-O2    |                   |                 |
|        |        | 736    | 18.8  | 1.6  | 736 | 15.4             | 1.4       | $\gamma$ C3-O20    |                   |                 |
|        | 715 vw | 732    | 24.2  | 0.8  | 729 | 66.1             | 0.9       | $\gamma$ C117-H118 |                   |                 |
|        |        | 729    | 35.2  | 0.4  | 728 | 9.6              | 0.2       | $\gamma$ C135-H136 |                   |                 |
|        |        |        | 713   | 19.2 | 5.5 | 711              | 4.0       | 1.5                | $\beta$ O2-H52    |                 |
|        |        |        | 709   | 18.6 | 2.3 | 709              | 29.0      | 0.8                | $\beta$ O1-H51    |                 |
|        |        |        | 698   | 54.9 | 3.6 | 698              | 3.4       | 38.9               | $\beta$ R         |                 |
|        |        | 694    | 1.6   | 2.6  | 694 | 26.2             | 9.0       | $\beta$ R          |                   |                 |
| 641 w  | 645 vw | 690    | 4.1   | 0.8  | 688 | 29.2             | 5.7       | $\beta$ R          |                   |                 |
|        |        | 655    | 84.7  | 6.7  | 664 | 83.7             | 3.1       | $\beta$ R          |                   |                 |
|        |        | 641    | 15.4  | 0.9  | 640 | 12.0             | 2.4       | $\beta$ R          |                   |                 |
|        |        |        | 640   | 7.3  | 3.2 | 638              | 14.8      | 1.3                | $\beta$ R         |                 |
|        | 618 vw | 634    | 2.3   | 14.5 | 634 | 2.7              | 2.6       | $\beta$ R          |                   |                 |
|        |        | 633    | 0.3   | 0.8  | 633 | 0.4              | 6.3       | $\beta$ R          |                   |                 |
|        |        | 628    | 2.4   | 29.3 | 631 | 3.8              | 47.3      | $\beta$ R          |                   |                 |
| 626    |        | 1.8    | 13.0  | 626  | 0.1 | 4.9              | $\beta$ R |                    |                   |                 |
| 577 w  | 578 vw | 598    | 2.8   | 0.7  | 598 | 3.0              | 1.6       | $\beta$ R          |                   |                 |
|        |        | 584    | 11.3  | 10.4 | 580 | 7.6              | 3.1       | $\beta$ R          |                   |                 |
|        |        | 571    | 9.4   | 0.9  | 572 | 17.5             | 12.1      | $\beta$ R          |                   |                 |
|        |        | 567    | 8.0   | 0.6  | 568 | 5.6              | 0.3       | $\beta$ R          |                   |                 |
|        |        | 557 vw | 561   | 0.8  | 1.9 | 565              | 3.0       | 0.6                | $\beta$ R         |                 |
|        |        | 549 sh | 560   | 5.7  | 2.4 | 562              | 4.9       | 1.3                | $\beta$ R         |                 |
|        | 553    |        | 4.5   | 4.0  | 553 | 7.9              | 1.4       | $\beta$ R          |                   |                 |
| 546 sh |        | 552    | 5.7   | 1.7  | 552 | 3.1              | 2.3       | $\beta$ R          |                   |                 |
|        |        | 551    | 1.6   | 0.9  | 550 | 5.4              | 0.7       | $\beta$ R          |                   |                 |
|        |        | 541    | 3.9   | 7.9  | 539 | 2.7              | 2.8       | $\beta$ R          |                   |                 |
| 532 w  | 523 w  | 536    | 2.8   | 15.5 | 534 | 1.0              | 14.5      | $\beta$ R          |                   |                 |
|        |        | 531    | 4.5   | 13.3 | 530 | 4.0              | 0.6       | $\beta$ R          |                   |                 |
|        |        | 527    | 1.3   | 8.3  | 524 | 0.1              | 3.7       | $\beta$ R          |                   |                 |
|        |        | 507    | 0.4   | 6.6  | 507 | 0.4              | 1.3       | $\beta$ R          |                   |                 |
|        |        | 505    | 0.4   | 1.6  | 505 | 0.5              | 1.3       | $\beta$ R          |                   |                 |
|        |        | 499    | 1.2   | 3.6  | 500 | 0.4              | 8.6       | $\beta$ R          |                   |                 |
|        |        | 496    | 0.8   | 1.4  | 498 | 0.4              | 0.2       | $\beta$ R          |                   |                 |
| 483 vw | 483 sh | 488    | 0.7   | 15.1 | 491 | 0.6              | 2.0       | $\beta$ R          |                   |                 |
|        |        | 479    | 4.4   | 2.5  | 475 | 2.2              | 0.6       | $\beta$ R          |                   |                 |
|        |        | 476    | 0.6   | 1.5  | 475 | 0.9              | 6.6       | $\beta$ R          |                   |                 |
|        |        | 474    | 0.8   | 4.8  | 473 | 3.8              | 3.1       | $\beta$ R          |                   |                 |
|        |        | 473 vw | 472   | 0.8  | 1.7 | 472              | 1.0       | 2.0                | $\beta$ C127-O126 |                 |
|        | 471    |        | 3.7   | 4.2  | 471 | 3.8              | 11.7      | $\beta$ C109-O128  |                   |                 |
|        | 465    |        | 6.0   | 0.7  | 465 | 1.3              | 0.3       | $\beta$ R          |                   |                 |
| 464 w  | 459 vw | 465    | 2.7   | 2.1  | 462 | 2.2              | 9.3       | $\beta$ R          |                   |                 |
|        |        | 455    | 1.3   | 15.3 | 456 | 1.3              | 3.6       | $\beta$ R          |                   |                 |
|        |        | 452    | 7.5   | 0.6  | 452 | 8.0              | 1.5       | $\beta$ R          |                   |                 |
|        |        | 440    | 5.6   | 0.6  | 450 | 6.7              | 1.0       | $\beta$ R          |                   |                 |
|        |        | 435    | 0.2   | 3.3  | 436 | 0.6              | 0.6       | $\gamma$ C30-O1    |                   |                 |
|        |        | 424 vw | 412 w | 434  | 0.0 | 0.9              | 434       | 0.0                | 0.5               | $\gamma$ C18-O2 |
|        |        |        |       | 426  | 0.6 | 14.5             | 420       | 1.3                | 2.6               | $\beta$ R       |
| 411    | 0.5    |        |       | 0.9  | 410 | 0.4              | 2.0       | $\beta$ R          |                   |                 |
| 403    | 1.6    |        |       | 7.3  | 397 | 0.6              | 3.2       | $\beta$ R          |                   |                 |
| 394    | 2.1    |        |       | 6.5  | 391 | 1.4              | 2.1       | $\beta$ R          |                   |                 |
| 386    | 1.3    |        |       | 4.7  | 387 | 0.1              | 1.3       | vC24-S23           |                   |                 |
| 384    | 2.7    |        |       | 5.3  | 385 | 3.0              | 2.5       | vC15-S16           |                   |                 |
| 383    | 1.1    |        |       | 13.4 | 382 | 3.9              | 0.6       | vC27-S16           |                   |                 |
| 382    | 2.3    |        |       | 28.1 | 381 | 2.4              | 4.8       | vC32-S29           |                   |                 |
| 378    | 0.7    |        |       | 0.7  | 376 | 0.8              | 0.3       | vC8-S25            |                   |                 |
| 374    | 1.6    | 2.4    | 372   | 0.5  | 1.8 | $\tau$ C124-C128 |           |                    |                   |                 |

|        |     |     |      |     |     |      |                    |
|--------|-----|-----|------|-----|-----|------|--------------------|
| 359 vw | 373 | 1.0 | 2.7  | 369 | 1.1 | 15.5 | $\beta_R$          |
|        | 361 | 0.1 | 2.1  | 360 | 1.5 | 1.7  | $\beta_R$          |
|        | 360 | 1.5 | 12.5 | 358 | 0.1 | 0.3  | $\tau_{C28-C35}$   |
| 340 vw | 354 | 0.1 | 0.6  | 354 | 0.1 | 0.6  | $\beta_R$          |
|        | 352 | 0.1 | 7.6  | 352 | 3.2 | 6.4  | $\beta_R$          |
|        | 349 | 0.7 | 5.0  | 348 | 0.3 | 0.2  | $\beta_R$          |
|        | 336 | 7.3 | 8.5  | 336 | 7.6 | 2.2  | $\beta_R$          |
|        | 334 | 3.1 | 19.3 | 335 | 5.5 | 3.4  | $\beta_R$          |
|        | 330 | 3.8 | 5.7  | 329 | 0.7 | 3.0  | $\nu_{C12-S29}$    |
|        | 326 | 2.2 | 2.1  | 327 | 1.3 | 0.3  | $\beta_R$          |
|        | 324 | 1.0 | 0.6  | 324 | 0.9 | 0.6  | $\tau_{C33-C38}$   |
|        | 321 | 0.9 | 0.7  | 322 | 0.2 | 0.6  | $\tau_{C5-C34}$    |
|        | 319 | 2.4 | 0.6  | 320 | 6.0 | 2.7  | $\nu_{C22-S23}$    |
|        | 314 | 0.3 | 0.1  | 312 | 0.5 | 1.8  | $\nu_{C27-S16}$    |
| 290 vw | 314 | 1.1 | 0.5  | 312 | 0.1 | 0.4  | $\tau_{C35-C45}$   |
|        | 312 | 0.1 | 0.1  | 311 | 0.7 | 5.2  | $\tau_{C34-C40}$   |
|        | 312 | 0.1 | 0.4  | 310 | 1.8 | 1.5  | $\tau_{C36-C47}$   |
|        | 304 | 0.3 | 0.6  | 302 | 0.3 | 2.4  | $\nu_{C7-S25}$     |
|        | 303 | 0.5 | 6.4  | 299 | 4.4 | 0.6  | $\beta_R$          |
|        | 297 | 2.4 | 2.4  | 299 | 1.3 | 2.0  | $\tau_{C50-O4}$    |
|        | 290 | 1.9 | 0.6  | 293 | 0.6 | 26.3 | $\tau_{C10-C33}$   |
|        | 287 | 0.7 | 2.0  | 290 | 0.2 | 11.5 | $\beta_R$          |
|        | 283 | 0.3 | 1.5  | 283 | 0.1 | 13.8 | $\tau_{C13-C36}$   |
|        | 277 | 0.5 | 1.8  | 280 | 0.0 | 0.7  | $\beta_R$          |
|        | 276 | 1.1 | 2.4  | 276 | 0.4 | 0.9  | $\tau_{C5-C34}$    |
| 254 vw | 268 | 0.7 | 2.1  | 270 | 0.6 | 0.9  | $\tau_{C28-C35}$   |
|        | 266 | 0.3 | 1.2  | 268 | 0.6 | 1.9  | $\tau_{C34-C41}$   |
|        | 261 | 0.0 | 0.9  | 263 | 0.0 | 1.7  | $\tau_{C35-C44}$   |
|        | 260 | 1.0 | 0.9  | 262 | 0.4 | 1.5  | $\tau_{C34-C42}$   |
|        | 258 | 0.0 | 0.9  | 261 | 0.0 | 3.8  | $\tau_{C35-C43}$   |
|        | 254 | 0.2 | 0.3  | 258 | 0.4 | 0.8  | $\tau_{C36-C46}$   |
|        | 250 | 1.2 | 1.5  | 252 | 3.0 | 3.6  | $\tau_{C33-C39}$   |
|        | 244 | 0.4 | 0.6  | 247 | 3.6 | 1.0  | $\tau_{C34-C41}$   |
|        | 239 | 3.0 | 1.8  | 239 | 0.4 | 1.0  | $\tau_{O4-C50}$    |
|        | 232 | 0.1 | 6.7  | 234 | 0.1 | 2.0  | $\tau_{O2-C18}$    |
|        | 229 | 0.1 | 7.7  | 230 | 0.0 | 1.4  | $\tau_{C34-C42}$   |
| 230 w  | 227 | 0.0 | 0.5  | 229 | 0.2 | 0.5  | $\tau_{C33-C37}$   |
|        | 226 | 0.4 | 1.5  | 227 | 0.9 | 1.8  | $\tau_{C36-C48}$   |
|        | 224 | 0.0 | 2.9  | 226 | 0.4 | 1.1  | $\tau_{C35-C44}$   |
|        | 217 | 0.2 | 3.9  | 219 | 2.7 | 2.9  | $\tau_{C110-C106}$ |
|        | 213 | 0.7 | 9.5  | 217 | 0.9 | 7.3  | $\tau_{C124-C128}$ |
|        | 209 | 1.8 | 1.7  | 214 | 1.8 | 11.0 | $\tau_{C12-S29}$   |
|        | 208 | 1.6 | 1.8  | 210 | 0.6 | 3.3  | $\tau_{C28-C35}$   |
|        | 203 | 2.3 | 9.7  | 203 | 0.3 | 5.2  | $\tau_{C109-C110}$ |
|        | 198 | 2.2 | 6.3  | 203 | 1.8 | 0.4  | $\tau_{C15-S16}$   |
|        | 191 | 0.5 | 1.3  | 203 | 0.9 | 5.4  | $\tau_{C119-N122}$ |
|        | 187 | 1.2 | 6.2  | 191 | 0.4 | 1.2  | $\tau_{C13-C36}$   |
| 153 w  | 182 | 2.1 | 13.9 | 179 | 2.1 | 2.8  | $\tau_{C24-S23}$   |
|        | 169 | 5.1 | 7.0  | 170 | 4.1 | 1.3  | $\tau_{C32-S29}$   |
|        | 158 | 1.5 | 31.6 | 166 | 4.1 | 3.0  | $\tau_{C3-C12}$    |
|        | 153 | 2.1 | 25.8 | 162 | 1.0 | 2.7  | $\tau_{C50-C119}$  |
|        | 147 | 1.2 | 23.6 | 159 | 0.6 | 18.4 | $\tau_{C26-C27}$   |
|        | 144 | 0.6 | 12.3 | 149 | 0.1 | 8.5  | $\tau_{C7-S25}$    |
|        | 140 | 0.8 | 21.8 | 144 | 1.9 | 1.5  | $\tau_{C27-S16}$   |
|        | 134 | 3.7 | 7.3  | 139 | 1.9 | 9.0  | $\tau_{C119-N122}$ |
|        | 124 | 1.4 | 32.1 | 128 | 0.8 | 3.7  | $\tau_{C21-O4}$    |

|     |     |      |     |     |      |                |
|-----|-----|------|-----|-----|------|----------------|
| 122 | 0.4 | 3.9  | 119 | 0.1 | 3.5  | $\tau$ C6-C7   |
| 115 | 0.4 | 18.9 | 117 | 0.9 | 1.7  | $\tau$ C21-C22 |
| 108 | 0.4 | 10.8 | 111 | 0.9 | 33.2 | $\tau$ C30-C32 |
| 106 | 0.6 | 13.9 | 106 | 0.7 | 3.1  | $\tau$ C18-C27 |
| 100 | 0.8 | 6.9  | 102 | 0.8 | 8.7  | $\tau$ C18-C27 |

---

Abbreviations: v: stretching;  $\delta$ : deformation in plane;  $\rho$ : deformation out of plane;  $\chi$ : torsion; as: antisymmetric; s: symmetric.



**Table S5.** For **5**, a comparison of Experimental and calculated wavenumbers  $\nu$  ( $\text{cm}^{-1}$ ), intensity I ( $\text{km/mol}$ ) of the bands in the IR spectra and relative intensity J (a.u.) of the lines in the Raman spectra of *exo-exo* and *endo-exo* rotamers.

| IR <sub>exp</sub> |        | Raman <sub>exp</sub> |                 |                | Assignment      |                 |      |                                                    |                                                  |
|-------------------|--------|----------------------|-----------------|----------------|-----------------|-----------------|------|----------------------------------------------------|--------------------------------------------------|
| $\nu$             | $\nu$  | <i>exo-exo</i>       | <i>endo-exo</i> | <i>exo-exo</i> | <i>endo-exo</i> | <i>endo-exo</i> |      |                                                    |                                                  |
|                   |        | $\nu$                | I               | J              | $\nu$           | I               | J    |                                                    |                                                  |
| 3420 m            |        | 3613                 | 66.7            | 0.8            | 3620            | 65.8            | 1.5  | $\nu\text{O38-H145}$                               |                                                  |
|                   |        | 3611                 | 80.4            | 42.9           | 3617            | 51.7            | 1.8  | $\nu\text{O104-H146}$                              |                                                  |
|                   |        | 3413                 | 988.2           | 1.0            | 3503            | 720.0           | 0.4  | $\nu\text{O143-H144}$                              |                                                  |
|                   |        | 3395                 | 721.5           | 2.0            | 3460            | 639.9           | 0.8  | $\nu\text{O138-H139}$                              |                                                  |
|                   |        | 3140                 | 8.0             | 3.2            | 3140            | 7.6             | 1.2  | $\nu\text{C99-H100}$                               |                                                  |
|                   |        | 3138                 | 8.5             | 1.0            | 3139            | 5.3             | 1.7  | $\nu\text{C31-H32}$                                |                                                  |
|                   |        | 3132                 | 2.9             | 1.2            | 3130            | 2.1             | 0.0  | $\nu\text{C73-H74}$                                |                                                  |
|                   |        | 3131                 | 2.6             | 0.9            | 3127            | 7.8             | 0.3  | $\nu\text{C7-H8}$                                  |                                                  |
|                   |        | 3125                 | 6.1             | 0.7            | 3126            | 3.0             | 0.2  | $\nu\text{C101-H102}$                              |                                                  |
|                   |        | 3123                 | 5.1             | 0.8            | 3125            | 5.3             | 0.2  | $\nu\text{C33-H34}$                                |                                                  |
|                   |        | 3114                 | 7.3             | 0.1            | 3116            | 6.6             | 3.1  | $\nu\text{C49-H50}$                                |                                                  |
|                   |        | 3114                 | 6.2             | 0.0            | 3115            | 4.9             | 1.6  | $\nu\text{C112-H113}$                              |                                                  |
|                   |        | 3112                 | 0.1             | 0.7            | 3113            | 0.9             | 0.2  | $\nu\text{C35-H36}$                                |                                                  |
|                   |        | 3111                 | 2.2             | 0.1            | 3110            | 2.1             | 1.1  | $\nu\text{C97-H98}$                                |                                                  |
|                   |        | 3101                 | 9.2             | 3.6            | 3106            | 5.4             | 0.2  | $\nu\text{C70-H71}$                                |                                                  |
|                   |        | 3100                 | 7.8             | 0.8            | 3102            | 8.1             | 0.7  | $\nu\text{C4-H5}$                                  |                                                  |
|                   |        | 3088                 | 19.1            | 0.1            | 3092            | 16.4            | 0.7  | $\nu\text{C46-H47}$                                |                                                  |
|                   |        | 3087                 | 11.5            | 1.6            | 3092            | 9.8             | 0.2  | $\nu\text{C115-H116}$                              |                                                  |
|                   |        | 3064                 | 5.7             | 0.1            | 3062            | 8.1             | 1.9  | $\nu\text{C64-H65 } \nu_{\text{as}} \text{CH}_2$   |                                                  |
|                   |        | 3062                 | 5.4             | 0.2            | 3060            | 16.8            | 0.1  | $\nu\text{C131-H132 } \nu_{\text{as}} \text{CH}_2$ |                                                  |
|                   |        | 3056                 | 28.5            | 0.1            | 3056            | 9.7             | 0.2  | $\nu\text{C14-H16 } \nu_{\text{as}} \text{CH}_3$   |                                                  |
|                   |        | 3056                 | 12.8            | 0.8            | 3055            | 0.7             | 0.1  | $\nu\text{C76-H78 } \nu_{\text{as}} \text{CH}_3$   |                                                  |
|                   |        | 3054                 | 14.9            | 0.0            | 3055            | 3.8             | 0.2  | $\nu\text{C10-H12 } \nu_{\text{as}} \text{CH}_3$   |                                                  |
|                   |        | 3054                 | 17.3            | 0.2            | 3055            | 37.8            | 2.0  | $\nu\text{C118-H119 } \nu_{\text{as}} \text{CH}_3$ |                                                  |
|                   |        | 3054                 | 26.4            | 0.1            | 3055            | 31.3            | 0.3  | $\nu\text{C56-H57 } \nu_{\text{as}} \text{CH}_3$   |                                                  |
|                   |        | 3053                 | 22.2            | 0.1            | 3055            | 21.1            | 1.1  | $\nu\text{C80-H81 } \nu_{\text{as}} \text{CH}_3$   |                                                  |
|                   |        | 3052                 | 19.5            | 0.0            | 3053            | 15.5            | 0.0  | $\nu\text{C60-H61 } \nu_{\text{as}} \text{CH}_3$   |                                                  |
|                   |        | 3052                 | 15.7            | 0.2            | 3053            | 14.0            | 0.2  | $\nu\text{C122-H123 } \nu_{\text{as}} \text{CH}_3$ |                                                  |
|                   |        | 3049                 | 44.5            | 1.2            | 3052            | 16.5            | 0.4  | $\nu\text{C76-H77 } \nu_{\text{as}} \text{CH}_3$   |                                                  |
|                   |        | 3048                 | 61.5            | 0.5            | 3051            | 69.2            | 4.8  | $\nu\text{C14-H15 } \nu_{\text{as}} \text{CH}_3$   |                                                  |
|                   |        | 3048                 | 90.2            | 0.3            | 3049            | 20.7            | 1.1  | $\nu\text{C10-H11 } \nu_{\text{as}} \text{CH}_3$   |                                                  |
|                   |        | 3048                 | 10.3            | 0.4            | 3047            | 23.4            | 0.2  | $\nu\text{C84-H85 } \nu_{\text{as}} \text{CH}_3$   |                                                  |
|                   | 3047 w |                      | 3047            | 15.6           | 0.5             | 3047            | 75.0 | 3.3                                                | $\nu\text{C52-H53 } \nu_{\text{as}} \text{CH}_3$ |
|                   |        | 3046                 | 32.2            | 1.1            | 3047            | 74.6            | 1.1  | $\nu\text{C126-H127 } \nu_{\text{as}} \text{CH}_3$ |                                                  |
|                   |        | 3046                 | 77.0            | 2.3            | 3046            | 2.2             | 0.5  | $\nu\text{C52-H54 } \nu_{\text{as}} \text{CH}_3$   |                                                  |
|                   |        | 3045                 | 69.8            | 1.0            | 3045            | 20.5            | 2.1  | $\nu\text{C122-H124 } \nu_{\text{as}} \text{CH}_3$ |                                                  |
|                   |        | 3042                 | 2.2             | 0.3            | 3045            | 38.4            | 0.7  | $\nu\text{C76-H79 } \nu_{\text{as}} \text{CH}_3$   |                                                  |
|                   |        | 3042                 | 3.0             | 1.3            | 3045            | 73.5            | 1.3  | $\nu\text{C14-H17 } \nu_{\text{s}} \text{CH}_3$    |                                                  |
|                   |        | 3041                 | 2.7             | 0.6            | 3043            | 2.5             | 0.0  | $\nu\text{C10-H13 } \nu_{\text{s}} \text{CH}_3$    |                                                  |
|                   |        | 3041                 | 2.6             | 0.1            | 3040            | 4.1             | 1.6  | $\nu\text{C80-H83 } \nu_{\text{as}} \text{CH}_3$   |                                                  |
| 3039 w            |        |                      | 3040            | 9.4            | 0.9             | 3040            | 3.7  | 1.2                                                | $\nu\text{C56-H58 } \nu_{\text{as}} \text{CH}_3$ |
|                   |        | 3039                 | 6.1             | 0.6            | 3039            | 2.6             | 1.5  | $\nu\text{C118-H121 } \nu_{\text{as}} \text{CH}_3$ |                                                  |
|                   |        | 3038                 | 1.7             | 0.1            | 3039            | 3.1             | 0.3  | $\nu\text{C122-H124 } \nu_{\text{as}} \text{CH}_3$ |                                                  |
|                   |        | 3038                 | 8.0             | 0.0            | 3039            | 10.3            | 0.5  | $\nu\text{C60-H61 } \nu_{\text{as}} \text{CH}_3$   |                                                  |
|                   |        | 3033                 | 6.4             | 0.9            | 3039            | 4.7             | 0.7  | $\nu\text{C40-H41 } \nu_{\text{as}} \text{CH}_2$   |                                                  |

|        |         |        |      |       |       |      |       |      |                   |                            |
|--------|---------|--------|------|-------|-------|------|-------|------|-------------------|----------------------------|
|        |         |        | 3033 | 5.8   | 0.3   | 3031 | 6.5   | 0.3  | vC106-H107        | $\nu_{as}$ CH <sub>2</sub> |
|        |         |        | 3010 | 20.3  | 0.1   | 3030 | 4.7   | 0.4  | vC22-H23          | $\nu_s$ CH <sub>2</sub>    |
|        |         |        | 3002 | 19.0  | 0.5   | 3028 | 15.5  | 1.4  | vC88-H89          | $\nu_s$ CH <sub>2</sub>    |
|        |         |        | 2991 | 21.3  | 1.3   | 3003 | 30.4  | 0.1  | vC91-H92          | $\nu_s$ CH <sub>2</sub>    |
|        |         |        | 2990 | 22.1  | 0.1   | 2990 | 0.5   | 1.5  | vC130-H131        | $\nu_s$ CH <sub>2</sub>    |
|        |         |        | 2989 | 16.1  | 0.3   | 2990 | 18.1  | 0.5  | vC64-H65          | $\nu_s$ CH <sub>2</sub>    |
|        |         |        | 2986 | 21.6  | 3.0   | 2986 | 25.8  | 1.0  | vC40-H42          | $\nu_s$ CH <sub>2</sub>    |
|        |         |        | 2986 | 4.8   | 1.8   | 2985 | 23.9  | 0.6  | vC25-H26          | $\nu_s$ CH <sub>2</sub>    |
|        |         |        | 2986 | 24.7  | 2.2   | 2983 | 45.8  | 6.9  | vC106-H108        | $\nu_s$ CH <sub>2</sub>    |
|        |         |        | 2973 | 40.8  | 0.2   | 2982 | 6.6   | 2.0  | vC14-H15          | $\nu_s$ CH <sub>3</sub>    |
|        |         |        | 2973 | 19.0  | 0.4   | 2976 | 24.9  | 0.3  | vC10-H11          | $\nu_s$ CH <sub>3</sub>    |
|        |         |        | 2971 | 30.2  | 2.0   | 2974 | 18.6  | 0.3  | vC52-H53          | $\nu_s$ CH <sub>3</sub>    |
|        |         |        | 2971 | 20.7  | 0.3   | 2972 | 39.0  | 4.3  | vC122-H123        | $\nu_s$ CH <sub>3</sub>    |
|        |         |        | 2971 | 20.0  | 0.9   | 2972 | 40.0  | 2.9  | vC28-H29          | $\nu_s$ CH <sub>2</sub>    |
|        |         |        | 2967 | 6.2   | 0.1   | 2971 | 16.1  | 2.2  | vC76-H79          | $\nu_s$ CH <sub>3</sub>    |
|        |         |        | 2967 | 35.7  | 1.2   | 2970 | 16.1  | 1.2  | vC14-H16          | $\nu_s$ CH <sub>3</sub>    |
|        |         |        | 2966 | 33.5  | 0.3   | 2967 | 20.2  | 0.1  | vC80-H81          | $\nu_s$ CH <sub>3</sub>    |
|        |         |        | 2966 | 6.2   | 0.3   | 2965 | 2.1   | 0.3  | vC18-H19          | $\nu_s$ CH <sub>3</sub>    |
|        |         |        | 2964 | 27.4  | 0.3   | 2965 | 25.5  | 0.7  | vC52-H54          | $\nu_s$ CH <sub>3</sub>    |
|        |         |        | 2964 | 24.6  | 0.9   | 2965 | 26.6  | 0.9  | vC126-H127        | $\nu_s$ CH <sub>3</sub>    |
|        |         |        | 2964 | 27.1  | 0.2   | 2965 | 47.5  | 1.1  | vC56-H57          | $\nu_s$ CH <sub>3</sub>    |
|        |         |        | 2964 | 21.8  | 0.1   | 2964 | 19.6  | 1.0  | vC118-H119        | $\nu_s$ CH <sub>3</sub>    |
|        |         | 2962 m | 2950 | 42.4  | 0.6   | 2964 | 18.9  | 1.0  | vC22-H24          | $\nu_s$ CH <sub>2</sub>    |
|        |         |        | 2946 | 57.1  | 1.9   | 2963 | 20.8  | 0.3  | vC94-H95          |                            |
| 2959 s |         |        | 2943 | 21.9  | 0.6   | 2959 | 30.9  | 1.4  | vC88-H89          | $\nu_s$ CH <sub>2</sub>    |
|        |         |        | 2940 | 7.4   | 0.2   | 2931 | 39.4  | 0.1  | vC25-H26          | $\nu_s$ CH <sub>2</sub>    |
| 2905 m | 2929 m  |        | 2915 | 25.0  | 0.3   | 2924 | 25.8  | 0.9  | vC91-H92          | $\nu_s$ CH <sub>2</sub>    |
| 2868 m | 2782 vw |        | 2656 | 602.6 | 100.0 | 2618 | 866.0 | 56.3 | vO141-H142        |                            |
|        | 2714 vw |        | 2516 | 999.9 | 17.3  | 2364 | 779.9 | 35.1 | vO136-H137        |                            |
|        |         |        | 1636 | 24.5  | 9.4   | 1637 | 10.6  | 7.7  | vC28=N133         |                            |
|        |         |        | 1629 | 263.3 | 6.7   | 1634 | 26.5  | 23.9 | vC94=N134         |                            |
| 1635 s | 1639 s  |        | 1625 | 129.7 | 2.8   | 1627 | 389.6 | 71.5 | vC30-C31          |                            |
|        |         |        | 1625 | 32.2  | 2.3   | 1626 | 59.4  | 1.0  | vC96-C97          |                            |
|        |         |        | 1607 | 36.1  | 2.5   | 1609 | 16.9  | 6.0  | vC31-C33          |                            |
| 1598 w | 1602 m  |        | 1603 | 22.3  | 15.7  | 1607 | 38.3  | 1.5  | vC109-C110        |                            |
|        |         |        | 1602 | 6.5   | 7.3   | 1598 | 3.6   | 4.4  | vC43-C44          |                            |
|        |         |        | 1600 | 15.8  | 1.5   | 1598 | 7.8   | 10.4 | vC101-C103        |                            |
|        |         |        | 1591 | 16.0  | 0.6   | 1594 | 4.0   | 3.6  | vC1-C2            |                            |
|        |         |        | 1591 | 6.3   | 1.1   | 1587 | 14.8  | 24.6 | vC69-C70          |                            |
|        |         |        | 1580 | 5.0   | 15.1  | 1582 | 15.9  | 3.0  | vC4-C6            |                            |
|        |         |        | 1576 | 4.9   | 0.2   | 1581 | 4.0   | 3.2  | vC44-C45          |                            |
|        |         |        | 1573 | 6.5   | 8.4   | 1573 | 7.6   | 10.9 | vC72-C73          |                            |
|        |         |        | 1570 | 9.4   | 11.2  | 1563 | 1.9   | 0.4  | vC6-C7            |                            |
| 1545 w |         |        | 1515 | 161.7 | 2.7   | 1518 | 212.4 | 12.2 | vC33-C35          |                            |
| 1484 s |         |        | 1502 | 105.2 | 3.4   | 1514 | 72.1  | 11.8 | vC99-C101         |                            |
|        |         |        | 1481 | 40.7  | 0.7   | 1513 | 12.1  | 0.2  | $\beta$ C22-H23   | $\delta_s$ CH <sub>2</sub> |
|        |         | 1476 m | 1480 | 57.9  | 0.1   | 1480 | 53.1  | 19.4 | $\beta$ C22-H24   | $\delta_s$ CH <sub>2</sub> |
|        |         |        | 1478 | 117.0 | 4.5   | 1477 | 144.5 | 1.1  | $\beta$ C118-H119 | $\delta_s$ CH <sub>3</sub> |
|        |         |        | 1474 | 17.3  | 0.5   | 1476 | 25.1  | 17.0 | $\beta$ C76-H77   | $\delta_s$ CH <sub>3</sub> |
|        |         |        | 1473 | 29.3  | 4.0   | 1474 | 12.2  | 1.2  | $\beta$ C10-H11   | $\delta_s$ CH <sub>3</sub> |
| 1470 s |         |        | 1473 | 45.2  | 2.3   | 1474 | 71.4  | 2.7  | vC35-C37          |                            |
|        |         |        | 1471 | 2.6   | 1.9   | 1472 | 11.9  | 0.1  | $\beta$ C52-H53   | $\delta_s$ CH <sub>3</sub> |
|        |         |        | 1471 | 4.0   | 4.6   | 1472 | 42.8  | 1.8  | $\beta$ C126-H127 | $\delta_s$ CH <sub>3</sub> |

|         |        |      |       |      |      |       |      |                                              |
|---------|--------|------|-------|------|------|-------|------|----------------------------------------------|
|         |        | 1465 | 15.1  | 12.2 | 1471 | 0.9   | 11.2 | $\beta$ C88-H90 $\delta_s$ CH <sub>2</sub>   |
|         |        | 1462 | 152.2 | 9.7  | 1470 | 6.2   | 1.6  | $\nu$ C96-C97                                |
|         |        | 1460 | 87.5  | 0.2  | 1460 | 7.6   | 1.6  | $\beta$ C10-H12 $\delta_s$ CH <sub>3</sub>   |
|         |        | 1459 | 23.4  | 0.2  | 1459 | 44.1  | 0.1  | $\beta$ C18-H19 $\delta_s$ CH <sub>3</sub>   |
|         |        | 1458 | 10.1  | 0.1  | 1459 | 11.0  | 3.2  | $\beta$ C84-H85 $\delta_s$ CH <sub>3</sub>   |
|         |        | 1458 | 11.0  | 0.1  | 1458 | 6.7   | 0.2  | $\beta$ C52-H53 $\delta_s$ CH <sub>3</sub>   |
|         |        | 1458 | 4.8   | 0.1  | 1458 | 5.5   | 0.1  | $\beta$ C18-H20 $\delta_s$ CH <sub>3</sub>   |
|         |        | 1456 | 13.9  | 1.0  | 1457 | 13.7  | 0.6  | $\beta$ C25-H26 $\delta_s$ CH <sub>2</sub>   |
|         |        | 1455 | 4.3   | 0.6  | 1455 | 11.6  | 0.7  | $\beta$ C88-H89 $\delta_s$ CH <sub>2</sub>   |
|         | 1452 m | 1455 | 13.7  | 0.0  | 1455 | 3.9   | 0.1  | $\beta$ C56-H57 $\delta_s$ CH <sub>3</sub>   |
|         |        | 1453 | 18.5  | 0.1  | 1451 | 90.6  | 0.1  | $\beta$ C118-H121 $\delta_s$ CH <sub>3</sub> |
|         |        | 1450 | 29.6  | 1.8  | 1450 | 38.8  | 0.4  | $\beta$ C10-H13 $\delta_s$ CH <sub>3</sub>   |
| 1443 sh |        | 1448 | 34.8  | 4.0  | 1449 | 20.9  | 32.9 | $\beta$ C80-H81 $\delta_s$ CH <sub>3</sub>   |
|         |        | 1443 | 76.5  | 15.9 | 1448 | 2.1   | 0.5  | C37-C39                                      |
|         |        | 1442 | 52.5  | 2.2  | 1443 | 129.7 | 16.4 | C97-C99                                      |
|         |        | 1441 | 5.3   | 0.3  | 1441 | 5.4   | 0.6  | $\beta$ C52-H54 $\delta_s$ CH <sub>3</sub>   |
|         |        | 1441 | 5.3   | 0.1  | 1441 | 0.2   | 0.1  | $\beta$ C84-H85 $\delta_s$ CH <sub>3</sub>   |
|         |        | 1439 | 13.9  | 0.7  | 1440 | 16.7  | 0.1  | $\beta$ C14-H17 $\delta_s$ CH <sub>3</sub>   |
|         |        | 1439 | 8.6   | 0.1  | 1439 | 1.5   | 2.5  | $\beta$ C10-H12 $\delta_s$ CH <sub>3</sub>   |
|         |        | 1437 | 0.3   | 0.1  | 1438 | 2.1   | 0.3  | $\beta$ C118-H119 $\delta_s$ CH <sub>3</sub> |
|         |        | 1436 | 0.8   | 0.1  | 1437 | 49.3  | 41.2 | $\beta$ C56-H58 $\delta_s$ CH <sub>3</sub>   |
|         |        | 1436 | 0.1   | 0.1  | 1437 | 1.2   | 0.3  | $\beta$ C14-H16 $\delta_s$ CH <sub>2</sub>   |
|         |        | 1436 | 0.1   | 0.0  | 1436 | 1.3   | 0.4  | $\beta$ C76-H77 $\delta_s$ CH <sub>3</sub>   |
|         |        | 1432 | 0.2   | 0.1  | 1436 | 1.2   | 0.7  | $\beta$ C52-H53 $\delta_s$ CH <sub>3</sub>   |
|         |        | 1431 | 0.3   | 0.0  | 1435 | 2.1   | 0.3  | $\beta$ C118-H119 $\delta_s$ CH <sub>3</sub> |
|         |        | 1431 | 0.0   | 0.2  | 1434 | 34.2  | 21.9 | $\beta$ C10-H11 $\delta_s$ CH <sub>3</sub>   |
|         |        | 1431 | 0.0   | 0.0  | 1433 | 0.8   | 0.2  | $\beta$ C80-H81 $\delta_s$ CH <sub>3</sub>   |
|         |        | 1430 | 19.1  | 3.6  | 1432 | 0.5   | 0.1  | $\beta$ C106-H107 $\delta_s$ CH <sub>2</sub> |
|         |        | 1429 | 20.6  | 3.2  | 1432 | 0.3   | 0.0  | $\beta$ C40-H41 $\delta_s$ CH <sub>2</sub>   |
|         |        | 1419 | 13.3  | 0.1  | 1431 | 0.3   | 0.2  | C111-C112                                    |
| 1416 w  |        | 1418 | 31.9  | 0.3  | 1430 | 3.6   | 1.3  | $\beta$ C64-H65 $\delta_s$ CH <sub>2</sub>   |
|         |        | 1417 | 6.0   | 9.1  | 1428 | 23.2  | 11.0 | $\beta$ C130-H131 $\delta_s$ CH <sub>2</sub> |
|         |        | 1416 | 7.0   | 1.1  | 1413 | 9.9   | 0.1  | $\nu$ C43-C44                                |
|         |        | 1411 | 26.1  | 0.5  | 1412 | 8.6   | 0.1  | $\beta$ C91-H92 $\delta_s$ CH <sub>2</sub>   |
| 1393 w  |        | 1405 | 11.1  | 1.8  | 1403 | 86.6  | 6.2  | $\nu$ C1-C2                                  |
|         |        | 1404 | 1.9   | 6.7  | 1403 | 6.7   | 0.4  | $\nu$ C70-C72                                |
|         |        | 1401 | 90.4  | 8.7  | 1401 | 3.9   | 0.2  | $\nu$ C30-C31                                |
|         |        | 1398 | 95.4  | 12.7 | 1397 | 56.0  | 9.7  | $\nu$ C97-C99                                |
|         |        | 1377 | 5.5   | 3.3  | 1380 | 7.3   | 5.7  | $\beta$ C10-H11 $\delta_s$ CH <sub>3</sub>   |
|         |        | 1376 | 5.8   | 5.3  | 1377 | 5.2   | 1.6  | $\beta$ C84-H85 $\delta_s$ CH <sub>3</sub>   |
| 1375 sh | 1371 w | 1375 | 8.7   | 0.6  | 1376 | 2.9   | 1.2  | $\beta$ C122-H123 $\delta_s$ CH <sub>3</sub> |
|         |        | 1375 | 1.2   | 0.1  | 1375 | 4.3   | 2.4  | $\beta$ C52-H53 $\delta_s$ CH <sub>3</sub>   |
| 1363 m  |        | 1371 | 7.3   | 0.9  | 1374 | 2.7   | 1.0  | $\beta$ C22-H23 wag CH <sub>2</sub>          |
|         |        | 1368 | 46.3  | 8.9  | 1374 | 26.9  | 0.2  | $\beta$ O138-H139                            |
|         |        | 1364 | 75.2  | 1.7  | 1369 | 56.3  | 0.2  | $\nu$ C46-C48                                |
|         |        | 1361 | 9.6   | 4.2  | 1360 | 41.4  | 12.4 | $\beta$ C91-H92 wag CH <sub>2</sub>          |
|         |        | 1354 | 45.2  | 0.4  | 1348 | 44.2  | 45.9 | $\beta$ C88-H89 wag CH <sub>2</sub>          |
|         |        | 1349 | 41.8  | 5.2  | 1347 | 2.7   | 0.5  | $\beta$ C22-H23 wag CH <sub>2</sub>          |
|         |        | 1342 | 2.9   | 1.5  | 1345 | 5.2   | 0.1  | $\beta$ C14-H17 $\delta_s$ CH <sub>3</sub>   |
|         |        | 1342 | 11.2  | 0.7  | 1344 | 9.9   | 1.2  | $\beta$ C84-H86 $\delta_s$ CH <sub>3</sub>   |
|         |        | 1341 | 4.4   | 2.0  | 1341 | 0.2   | 0.2  | $\beta$ C52-H54 $\delta_s$ CH <sub>3</sub>   |
|         |        | 1341 | 37.7  | 0.1  | 1341 | 21.4  | 0.2  | $\beta$ C60-H61 $\delta_s$ CH <sub>3</sub>   |
| 1341 w  | 1342 w | 1341 | 2.3   | 0.0  | 1341 | 4.4   | 0.5  | $\beta$ C10-H12 $\delta_s$ CH <sub>3</sub>   |
|         |        | 1341 | 13.5  | 0.1  | 1340 | 29.2  | 0.3  | $\beta$ C76-H77 $\delta_s$ CH <sub>3</sub>   |
|         |        | 1340 | 6.9   | 0.1  | 1340 | 9.3   | 0.9  | $\beta$ C122-H125 $\delta_s$ CH <sub>3</sub> |

|         |         |      |       |      |      |       |       |                                            |
|---------|---------|------|-------|------|------|-------|-------|--------------------------------------------|
|         |         | 1340 | 11.1  | 0.3  | 1339 | 13.0  | 0.1   | $\beta$ C56–H58 $\delta_s$ CH <sub>3</sub> |
|         |         | 1338 | 4.7   | 0.4  | 1335 | 5.1   | 100.0 | vC2–C3                                     |
|         |         | 1337 | 1.2   | 35.4 | 1331 | 1.6   | 8.6   | vC67–C68                                   |
|         |         | 1325 | 66.6  | 2.3  | 1318 | 2.7   | 31.2  | $\beta$ C91–H92 wag CH <sub>2</sub>        |
|         | 1316 w  | 1318 | 2.5   | 0.1  | 1314 | 40.3  | 6.9   | $\beta$ O138–H139                          |
|         |         | 1313 | 64.5  | 16.7 | 1313 | 3.5   | 0.5   | $\beta$ O38–H145                           |
|         |         | 1312 | 3.2   | 1.2  | 1309 | 45.4  | 69.7  | $\beta$ O104–H146                          |
|         | 1302 w  | 1310 | 25.6  | 1.6  | 1290 | 44.8  | 5.2   | $\beta$ O141–H142                          |
|         |         | 1294 | 26.2  | 0.5  | 1284 | 35.6  | 8.9   | $\beta$ C25–H27 wag CH <sub>2</sub>        |
| 1298 sh |         | 1286 | 125.4 | 3.2  | 1281 | 10.6  | 4.4   | $\beta$ C106–H107 wag CH <sub>2</sub>      |
|         | 1284 sh | 1283 | 32.6  | 0.6  | 1277 | 65.3  | 0.6   | $\beta$ C40–H41 wag CH <sub>2</sub>        |
|         |         | 1281 | 98.4  | 0.3  | 1277 | 59.8  | 0.2   | $\beta$ C106–H108 wag CH <sub>2</sub>      |
|         |         | 1279 | 56.6  | 0.2  | 1276 | 33.5  | 1.5   | $\beta$ C64–H65 wag CH <sub>2</sub>        |
|         | 1276 w  | 1276 | 124.7 | 12.7 | 1276 | 101.7 | 45.5  | vC30–C39                                   |
|         |         | 1273 | 3.9   | 1.1  | 1271 | 98.6  | 22.6  | $\beta$ C130–H131 wag CH <sub>2</sub>      |
| 1271 m  |         | 1272 | 16.6  | 2.2  | 1266 | 52.3  | 0.8   | vC103–O104                                 |
|         | 1265 w  | 1269 | 55.2  | 14.0 | 1265 | 8.8   | 21.8  | vC94–C96                                   |
|         |         | 1265 | 3.6   | 6.2  | 1259 | 6.1   | 1.9   | $\beta$ C106–H108 wag CH <sub>2</sub>      |
|         |         | 1264 | 11.8  | 0.8  | 1257 | 4.0   | 7.7   | $\beta$ C40–H42 wag CH <sub>2</sub>        |
|         |         | 1262 | 16.6  | 2.6  | 1257 | 4.8   | 0.5   | $\beta$ C88–H89 wag CH <sub>2</sub>        |
|         |         | 1261 | 13.8  | 1.2  | 1256 | 0.9   | 2.0   | $\beta$ C22–H24 wag CH <sub>2</sub>        |
|         | 1239 w  | 1256 | 24.4  | 0.3  | 1248 | 108.2 | 3.1   | $\beta$ C64–H65 wag CH <sub>2</sub>        |
| 1237 sh |         | 1253 | 4.0   | 0.3  | 1242 | 1.1   | 1.1   | vC44–O138                                  |
|         |         | 1237 | 1.8   | 1.1  | 1239 | 3.1   | 3.0   | $\beta$ C7–H8                              |
|         |         | 1236 | 8.9   | 7.6  | 1233 | 0.2   | 0.0   | $\beta$ C4–H5                              |
|         |         | 1228 | 44.6  | 4.5  | 1227 | 70.5  | 2.8   | vC39–O136                                  |
|         | 1224 m  | 1225 | 45.8  | 6.5  | 1224 | 19.5  | 9.0   | vC105–O141                                 |
|         |         | 1220 | 105.4 | 0.7  | 1220 | 52.8  | 15.2  | $\beta$ C46–H47                            |
|         |         | 1216 | 29.0  | 0.8  | 1216 | 13.6  | 5.5   | vC68–O140                                  |
|         |         | 1214 | 12.1  | 3.8  | 1211 | 11.0  | 1.8   | $\beta$ C49–H50                            |
|         |         | 1212 | 13.2  | 3.1  | 1207 | 65.2  | 0.5   | $\beta$ O138–H139                          |
|         | 1207 sh | 1207 | 45.8  | 6.0  | 1206 | 50.0  | 2.7   | $\beta$ O38–H145                           |
|         |         | 1206 | 49.4  | 3.0  | 1204 | 51.2  | 3.4   | $\beta$ O104–H146                          |
|         |         | 1206 | 49.0  | 5.8  | 1198 | 36.2  | 0.2   | $\beta$ C88–H89 $\rho$ CH <sub>2</sub>     |
| 1197 m  |         | 1199 | 28.1  | 3.0  | 1197 | 11.4  | 0.9   | vC40–C43                                   |
|         |         | 1198 | 34.6  | 3.7  | 1195 | 7.9   | 0.2   | vC114–C117                                 |
|         |         | 1194 | 13.9  | 0.2  | 1193 | 1.6   | 2.2   | vC9–C10                                    |
|         |         | 1193 | 7.7   | 0.1  | 1193 | 1.4   | 2.8   | vC75–C76                                   |
|         |         | 1190 | 16.2  | 10.1 | 1190 | 1.7   | 0.2   | vC117–C118                                 |
|         |         | 1190 | 25.3  | 0.2  | 1190 | 42.0  | 30.1  | C51–C52                                    |
|         |         | 1189 | 18.2  | 1.0  | 1189 | 12.7  | 0.1   | $\beta$ C22–H23 $\rho$ CH <sub>2</sub>     |
|         |         | 1188 | 6.8   | 0.2  | 1188 | 12.5  | 0.1   | vC51–C56                                   |
|         |         | 1188 | 3.3   | 0.2  | 1188 | 6.8   | 0.2   | vC9–C14                                    |
|         |         | 1188 | 6.2   | 0.1  | 1188 | 6.0   | 0.3   | vC117–C122                                 |
|         |         | 1188 | 3.2   | 0.2  | 1188 | 49.6  | 0.8   | vC51–C60                                   |
|         |         | 1173 | 114.3 | 2.2  | 1173 | 162.7 | 0.1   | vC1–C130                                   |
|         |         | 1169 | 44.1  | 2.3  | 1163 | 27.8  | 1.8   | $\beta$ C106–H107 $\rho$ CH <sub>2</sub>   |
|         | 1177 vw | 1157 | 49.7  | 1.0  | 1151 | 1.6   | 1.9   | $\beta$ C130–H131 $\rho$ CH <sub>2</sub>   |
|         |         | 1155 | 22.0  | 0.9  | 1150 | 5.0   | 0.9   | $\beta$ C64–H65 $\rho$ CH <sub>2</sub>     |
|         | 1167 vw | 1151 | 2.1   | 0.3  | 1150 | 4.1   | 7.9   | $\beta$ C31–H32                            |
|         |         | 1150 | 4.5   | 0.1  | 1148 | 28.0  | 1.1   | $\beta$ C97–H98                            |
|         |         | 1149 | 13.6  | 0.0  | 1144 | 17.4  | 0.1   | $\beta$ C40–H42 $\rho$ CH <sub>2</sub>     |
| 1123 m  | 1131 w  | 1148 | 6.9   | 0.0  | 1135 | 0.7   | 6.3   | $\beta$ C106–H108 $\rho$ CH <sub>2</sub>   |
|         |         | 1121 | 34.3  | 3.5  | 1129 | 22.3  | 1.7   | $\beta$ C26–H27 $\rho$ CH <sub>2</sub>     |
|         |         | 1111 | 61.0  | 0.3  | 1120 | 30.4  | 1.1   | $\beta$ C112–H113                          |

|         |        |      |       |      |      |       |      |                                          |
|---------|--------|------|-------|------|------|-------|------|------------------------------------------|
|         |        | 1103 | 5.3   | 0.2  | 1109 | 75.8  | 3.1  | $\beta$ C115-H116                        |
|         |        | 1095 | 32.1  | 2.4  | 1099 | 8.4   | 0.1  | vC91-N134                                |
| 1097 w  |        | 1089 | 12.7  | 0.4  | 1090 | 13.1  | 0.3  | vC4-C6                                   |
|         |        | 1084 | 86.8  | 9.4  | 1079 | 52.1  | 24.0 | vC2-C3                                   |
|         |        | 1068 | 22.0  | 0.2  | 1068 | 4.8   | 0.1  | $\beta$ C88-H89 $\rho$ CH <sub>2</sub>   |
|         | 1075 w | 1067 | 6.1   | 0.1  | 1065 | 19.1  | 3.4  | $\beta$ C91-H92 $\rho$ CH <sub>2</sub>   |
| 1067 sh |        | 1060 | 13.7  | 3.0  | 1054 | 5.6   | 0.2  | $\beta$ C88-H90 $\rho$ CH <sub>2</sub>   |
| 1050 w  |        | 1053 | 7.1   | 1.3  | 1053 | 11.7  | 0.5  | vC2-O135                                 |
|         | 1030 w | 1044 | 17.0  | 0.3  | 1042 | 78.5  | 2.2  | vC105-O141                               |
| 1021 m  |        | 1040 | 3.6   | 0.5  | 1039 | 17.8  | 2.8  | C28-C30                                  |
|         |        | 1020 | 56.2  | 13.6 | 1036 | 2.3   | 0.4  | C33-C35                                  |
|         |        | 1019 | 70.2  | 0.3  | 1019 | 13.9  | 4.3  | C94-C96                                  |
|         |        | 1014 | 0.1   | 0.1  | 1015 | 0.1   | 0.0  | $\beta$ C118-H119 $\rho$ CH <sub>3</sub> |
|         |        | 1014 | 0.2   | 0.1  | 1015 | 0.8   | 0.1  | $\beta$ C14-H17 $\rho$ CH <sub>3</sub>   |
|         |        | 1014 | 0.2   | 0.2  | 1014 | 3.1   | 2.2  | $\beta$ C56-H57 $\rho$ CH <sub>3</sub>   |
|         |        | 1013 | 0.3   | 0.1  | 1013 | 0.1   | 0.0  | $\beta$ C76-H77 $\rho$ CH <sub>3</sub>   |
|         |        | 1013 | 0.9   | 0.0  | 1013 | 1.6   | 1.4  | $\beta$ C18-H19 $\rho$ CH <sub>3</sub>   |
|         |        | 1012 | 1.0   | 2.7  | 1013 | 16.0  | 9.9  | $\beta$ C52-H53 $\rho$ CH <sub>3</sub>   |
|         |        | 1011 | 1.3   | 0.0  | 1012 | 0.2   | 1.0  | $\beta$ C18-H20 $\rho$ CH <sub>3</sub>   |
|         |        | 1011 | 2.0   | 0.0  | 1011 | 0.9   | 2.3  | $\beta$ C84-H85 $\rho$ CH <sub>3</sub>   |
|         |        | 1001 | 218.4 | 2.0  | 1011 | 1.1   | 0.3  | vC2-O135                                 |
| 978 w   | 983 vw | 995  | 89.1  | 0.0  | 1001 | 101.1 | 4.2  | $\beta$ O136-H137                        |
|         |        | 986  | 56.4  | 0.0  | 973  | 211.6 | 32.6 | $\beta$ O141-H142                        |
|         |        | 972  | 3.0   | 0.3  | 970  | 15.4  | 0.1  | vC3-C40                                  |
|         |        | 968  | 1.7   | 0.7  | 968  | 14.0  | 0.9  | vC64-C67                                 |
| 947 sh  |        | 968  | 22.3  | 0.2  | 966  | 89.2  | 8.5  | vC72-C75                                 |
|         | 939 sh | 966  | 1.8   | 0.8  | 957  | 3.2   | 2.3  | $\beta$ C28-H29                          |
|         |        | 956  | 2.1   | 0.3  | 950  | 1.3   | 0.3  | vC40-C43                                 |
|         |        | 955  | 0.6   | 1.0  | 949  | 6.8   | 0.8  | $\beta$ C94-H95                          |
|         |        | 932  | 19.9  | 0.1  | 944  | 11.2  | 0.7  | vC114-C117                               |
|         |        | 930  | 0.8   | 0.0  | 935  | 23.9  | 4.1  | $\gamma$ C31-H32                         |
|         | 928 w  | 929  | 0.2   | 1.0  | 930  | 0.1   | 0.2  | $\beta$ C99-H100                         |
|         |        | 929  | 1.1   | 3.1  | 928  | 2.1   | 0.2  | $\beta$ C101-H102                        |
|         |        | 927  | 0.2   | 0.1  | 928  | 0.6   | 0.9  | $\beta$ C18-H19 $\rho$ CH <sub>3</sub>   |
| 921 w   |        | 927  | 5.1   | 0.7  | 928  | 0.2   | 0.1  | vC3-C4                                   |
|         |        | 927  | 0.3   | 0.0  | 927  | 3.3   | 1.5  | $\beta$ C84-H85 $\rho$ CH <sub>3</sub>   |
|         |        | 926  | 0.0   | 0.0  | 927  | 0.1   | 0.1  | $\beta$ C52-H53 $\rho$ CH <sub>3</sub>   |
|         |        | 926  | 0.5   | 0.1  | 927  | 0.4   | 0.3  | $\beta$ C60-H62 $\rho$ CH <sub>3</sub>   |
|         |        | 921  | 1.1   | 0.0  | 925  | 18.9  | 0.8  | vC48-C51                                 |
|         |        | 915  | 0.8   | 0.3  | 920  | 0.8   | 0.2  | vC9-C18                                  |
|         |        | 915  | 0.9   | 0.1  | 917  | 2.8   | 0.1  | vC75-C84                                 |
|         |        | 914  | 1.4   | 0.2  | 916  | 1.9   | 0.7  | vC51-C52                                 |
|         | 910 w  | 913  | 0.6   | 0.1  | 914  | 1.8   | 0.9  | vC117-C122                               |
|         |        | 907  | 1.1   | 0.2  | 912  | 0.2   | 0.0  | vC9-C14                                  |
|         |        | 906  | 5.1   | 0.4  | 911  | 0.6   | 0.3  | vC75-C76                                 |
|         |        | 906  | 24.1  | 0.1  | 908  | 1.4   | 0.6  | vC69-C70                                 |
|         |        | 905  | 3.6   | 0.1  | 906  | 1.2   | 0.3  | vC51-C60                                 |
|         |        | 904  | 0.6   | 0.1  | 905  | 1.7   | 0.1  | vC117-C126                               |
|         |        | 904  | 5.8   | 1.1  | 904  | 2.0   | 0.1  | vC40-C43                                 |
|         |        | 902  | 4.4   | 1.2  | 902  | 5.8   | 0.6  | vC45-C64                                 |
|         | 881 w  | 898  | 32.4  | 2.7  | 900  | 5.5   | 0.1  | vC91-N134                                |
| 873 m   |        | 894  | 4.3   | 1.4  | 891  | 2.2   | 2.2  | vC1-C130                                 |
|         |        | 876  | 3.2   | 0.1  | 877  | 2.4   | 0.0  | $\gamma$ C46-H47                         |
|         |        | 874  | 10.9  | 0.6  | 875  | 1.0   | 0.0  | $\gamma$ C7-H8                           |

|        |        |     |       |     |     |       |      |                      |
|--------|--------|-----|-------|-----|-----|-------|------|----------------------|
|        |        | 873 | 1.7   | 0.0 | 871 | 0.1   | 0.3  | $\gamma$ C4-H5       |
|        |        | 870 | 0.3   | 2.2 | 868 | 2.6   | 0.4  | $\gamma$ C112-H113   |
|        |        | 868 | 0.2   | 0.0 | 866 | 4.6   | 0.3  | $\gamma$ C49-H50     |
|        |        | 862 | 0.7   | 2.3 | 859 | 4.4   | 0.0  | $\gamma$ C115-H116   |
|        | 854 w  | 862 | 2.0   | 0.0 | 858 | 22.7  | 0.2  | $\gamma$ C31-H32     |
|        |        | 859 | 3.5   | 0.0 | 857 | 2.1   | 0.1  | $\gamma$ C101-H102   |
| 849 w  |        | 857 | 14.5  | 0.0 | 854 | 13.9  | 0.3  | $\gamma$ C115-H116   |
|        |        | 854 | 16.8  | 0.0 | 854 | 3.9   | 0.3  | $\gamma$ C73-H74     |
|        |        | 851 | 8.1   | 0.7 | 845 | 17.6  | 22.3 | $\gamma$ C70-H71     |
|        | 832 sh | 845 | 16.4  | 4.9 | 844 | 10.2  | 6.4  | vC37-O38             |
|        | 820 m  | 841 | 15.9  | 0.3 | 814 | 2.8   | 0.8  | vC103-O104           |
| 815 w  |        | 816 | 4.0   | 1.8 | 810 | 7.7   | 0.1  | vC2-C3               |
|        |        | 810 | 8.4   | 1.3 | 809 | 6.7   | 0.2  | vC51-C52             |
| 801 sh | 806 sh | 805 | 12.1  | 1.6 | 803 | 14.4  | 9.2  | vC9-C18              |
|        |        | 801 | 1.8   | 1.6 | 800 | 5.4   | 3.1  | vC2-O135             |
|        |        | 800 | 0.3   | 0.1 | 796 | 2.2   | 0.0  | vC44-O138            |
| 779 w  |        | 795 | 4.6   | 7.7 | 794 | 1.6   | 0.6  | vC75-C84             |
|        |        | 794 | 2.4   | 0.2 | 782 | 11.0  | 0.8  | vC45-C64             |
|        | 762 vw | 778 | 2.1   | 0.1 | 773 | 5.6   | 0.7  | vC43-C44             |
| 755 sh |        | 773 | 25.3  | 0.1 | 766 | 2.9   | 0.4  | $\gamma$ O138-H139   |
|        |        | 767 | 10.4  | 0.1 | 765 | 10.4  | 0.0  | vC39-O136            |
| 733 m  | 734 w  | 765 | 8.2   | 0.5 | 761 | 13.3  | 0.2  | vC105-O141           |
|        |        | 753 | 21.9  | 1.0 | 748 | 5.0   | 0.1  | vC138-O139           |
|        |        | 739 | 66.3  | 0.2 | 742 | 7.5   | 0.9  | vC110-O141           |
|        | 720 vw | 731 | 41.6  | 0.5 | 731 | 8.2   | 0.7  | $\beta$ <sub>R</sub> |
|        |        | 729 | 38.9  | 0.2 | 728 | 23.2  | 9.3  | $\beta$ <sub>R</sub> |
|        |        | 725 | 21.1  | 0.2 | 724 | 9.7   | 0.0  | $\beta$ <sub>R</sub> |
|        |        | 721 | 22.4  | 4.9 | 718 | 3.5   | 0.0  | $\beta$ <sub>R</sub> |
|        | 703 w  | 720 | 38.6  | 0.0 | 716 | 55.1  | 2.5  | $\gamma$ C31-H32     |
|        |        | 717 | 33.2  | 0.1 | 716 | 105.8 | 0.6  | $\gamma$ C99-H100    |
|        | 680 w  | 708 | 15.9  | 0.1 | 705 | 12.0  | 0.6  | $\beta$ <sub>R</sub> |
|        | 675 vw | 695 | 5.8   | 0.2 | 690 | 0.8   | 4.0  | $\beta$ <sub>R</sub> |
|        |        | 687 | 1.5   | 1.1 | 672 | 1.3   | 2.6  | $\beta$ <sub>R</sub> |
|        | 649 vw | 670 | 2.6   | 0.0 | 668 | 3.1   | 2.9  | $\beta$ <sub>R</sub> |
| 636 w  |        | 666 | 0.6   | 0.6 | 660 | 0.1   | 1.0  | $\beta$ <sub>R</sub> |
|        | 631 w  | 661 | 0.2   | 1.0 | 636 | 60.5  | 1.1  | $\gamma$ C48-C51     |
|        |        | 632 | 0.0   | 0.0 | 633 | 0.7   | 3.7  | $\gamma$ C114-C117   |
|        |        | 629 | 3.6   | 2.6 | 629 | 9.0   | 0.9  | $\beta$ <sub>R</sub> |
|        |        | 626 | 5.5   | 0.1 | 627 | 6.5   | 0.6  | $\beta$ <sub>R</sub> |
|        |        | 616 | 3.4   | 0.2 | 617 | 3.2   | 0.1  | $\beta$ <sub>R</sub> |
| 591 w  | 594 w  | 616 | 0.6   | 0.5 | 617 | 5.0   | 0.3  | $\gamma$ C3-C40      |
|        |        | 595 | 0.1   | 0.0 | 591 | 2.1   | 1.4  | $\beta$ <sub>R</sub> |
|        |        | 589 | 21.2  | 0.8 | 590 | 6.1   | 1.1  | $\beta$ <sub>R</sub> |
|        | 582 w  | 586 | 1.1   | 0.9 | 586 | 1.3   | 0.1  | $\beta$ <sub>R</sub> |
|        |        | 580 | 2.9   | 0.6 | 576 | 4.2   | 0.3  | $\beta$ <sub>R</sub> |
| 575 vw |        | 576 | 14.7  | 0.4 | 575 | 4.9   | 0.4  | $\gamma$ C103-O104   |
|        | 562 w  | 573 | 12.6  | 0.0 | 570 | 0.5   | 0.3  | $\gamma$ C105-O141   |
|        |        | 572 | 4.2   | 0.1 | 566 | 4.4   | 2.6  | $\beta$ <sub>R</sub> |
| 554 w  |        | 568 | 105.2 | 0.1 | 558 | 12.5  | 0.2  | $\gamma$ O104-H146   |
|        |        | 557 | 10.8  | 1.6 | 557 | 24.1  | 0.3  | $\beta$ <sub>R</sub> |
|        | 545 vw | 557 | 1.7   | 2.7 | 555 | 30.0  | 1.0  | $\beta$ <sub>R</sub> |
|        |        | 554 | 32.9  | 0.2 | 554 | 4.6   | 0.1  | $\beta$ <sub>R</sub> |
|        |        | 551 | 9.6   | 4.1 | 553 | 54.1  | 0.2  | $\beta$ <sub>R</sub> |
|        |        | 546 | 8.9   | 1.9 | 548 | 15.4  | 1.4  | $\beta$ <sub>R</sub> |
|        |        | 541 | 31.7  | 0.2 | 533 | 0.4   | 0.6  | $\tau$ C103-C105     |

|        |        |     |      |      |     |      |      |                      |
|--------|--------|-----|------|------|-----|------|------|----------------------|
|        |        | 534 | 3.1  | 0.2  | 526 | 5.7  | 0.1  | $\gamma$ C2-O135     |
|        | 514 vw | 529 | 4.3  | 0.6  | 525 | 1.3  | 0.1  | $\beta$ <sub>R</sub> |
|        | 504 w  | 525 | 10.6 | 2.1  | 523 | 49.3 | 0.3  | $\nu$ C72-C75        |
|        |        | 523 | 42.4 | 0.8  | 522 | 83.4 | 0.2  | $\gamma$ O38-H145    |
|        |        | 521 | 5.3  | 0.1  | 519 | 1.8  | 0.8  | $\beta$ <sub>R</sub> |
|        |        | 508 | 1.9  | 0.1  | 512 | 0.5  | 0.4  | $\beta$ <sub>R</sub> |
|        |        | 503 | 2.9  | 0.1  | 503 | 1.4  | 0.4  | $\beta$ <sub>R</sub> |
| 484 vw |        | 502 | 0.1  | 3.6  | 501 | 0.9  | 0.1  | $\beta$ <sub>R</sub> |
|        |        | 499 | 0.3  | 2.7  | 500 | 0.5  | 0.0  | $\beta$ <sub>R</sub> |
|        |        | 497 | 2.3  | 6.3  | 497 | 1.2  | 0.4  | $\beta$ <sub>R</sub> |
|        | 471 vw | 490 | 1.0  | 2.9  | 492 | 1.5  | 5.1  | $\beta$ <sub>R</sub> |
|        |        | 487 | 0.9  | 0.1  | 489 | 0.4  | 6.3  | $\beta$ <sub>R</sub> |
|        |        | 483 | 2.0  | 2.2  | 483 | 1.8  | 15.0 | $\beta$ <sub>R</sub> |
|        |        | 475 | 3.8  | 5.4  | 480 | 0.1  | 2.7  | $\beta$ <sub>R</sub> |
|        | 447 vw | 472 | 1.2  | 0.1  | 472 | 1.6  | 0.0  | $\beta$ <sub>R</sub> |
| 438 w  |        | 449 | 2.1  | 0.4  | 442 | 3.2  | 16.4 | $\beta$ <sub>R</sub> |
|        |        | 441 | 1.2  | 4.2  | 438 | 0.2  | 0.1  | $\beta$ C39-O136     |
|        |        | 437 | 0.3  | 0.1  | 436 | 0.4  | 0.2  | $\gamma$ C44-O138    |
|        | 420 w  | 435 | 0.7  | 0.7  | 435 | 0.4  | 14.2 | $\gamma$ C110-O143   |
|        |        | 421 | 5.6  | 15.1 | 421 | 1.1  | 16.8 | $\beta$ <sub>R</sub> |
|        |        | 416 | 0.3  | 3.7  | 418 | 6.1  | 6.6  | $\beta$ <sub>R</sub> |
|        |        | 414 | 0.4  | 2.0  | 416 | 0.9  | 27.8 | $\beta$ <sub>R</sub> |
|        |        | 413 | 1.8  | 1.0  | 412 | 0.4  | 4.7  | $\beta$ <sub>R</sub> |
|        |        | 408 | 0.4  | 0.3  | 410 | 0.6  | 1.5  | $\beta$ <sub>R</sub> |
|        |        | 402 | 0.8  | 0.3  | 408 | 0.1  | 0.9  | $\beta$ <sub>R</sub> |
|        |        | 382 | 3.1  | 5.7  | 386 | 6.4  | 2.9  | $\beta$ <sub>R</sub> |
|        |        | 380 | 2.1  | 0.0  | 380 | 6.5  | 0.3  | $\beta$ <sub>R</sub> |
|        |        | 376 | 0.3  | 1.2  | 378 | 0.8  | 2.4  | $\beta$ <sub>R</sub> |
|        |        | 372 | 3.3  | 0.1  | 364 | 0.8  | 0.5  | $\tau$ C72-C75       |
|        | 361 sh | 365 | 1.5  | 0.5  | 362 | 0.3  | 0.3  | $\tau$ C48-C51       |
|        |        | 360 | 0.1  | 0.4  | 361 | 0.6  | 0.4  | $\tau$ C114-C117     |
|        |        | 358 | 1.1  | 0.3  | 354 | 0.3  | 0.2  | $\tau$ C44-C45       |
|        | 343 vw | 354 | 0.8  | 0.0  | 353 | 1.5  | 0.7  | $\beta$ <sub>R</sub> |
|        |        | 352 | 5.6  | 0.1  | 346 | 2.3  | 0.5  | $\beta$ <sub>R</sub> |
|        |        | 344 | 4.9  | 4.8  | 344 | 2.9  | 0.1  | $\beta$ <sub>R</sub> |
|        |        | 342 | 3.1  | 0.7  | 343 | 16.4 | 1.3  | $\gamma$ C103-O104   |
|        |        | 341 | 3.3  | 0.2  | 339 | 4.5  | 0.8  | $\beta$ <sub>R</sub> |
|        |        | 330 | 1.4  | 0.1  | 332 | 0.2  | 0.9  | $\tau$ C117-C126     |
|        | 320 vw | 329 | 0.6  | 0.5  | 328 | 0.5  | 0.0  | $\tau$ C75-C84       |
|        |        | 327 | 0.5  | 0.1  | 322 | 0.7  | 0.1  | $\tau$ C9-C18        |
|        |        | 321 | 0.7  | 1.6  | 321 | 0.7  | 0.6  | $\tau$ C117-C122     |
|        |        | 316 | 0.8  | 0.3  | 317 | 0.3  | 1.3  | $\tau$ C9-C14        |
|        |        | 316 | 0.0  | 1.3  | 316 | 0.6  | 0.1  | $\tau$ C28-C30       |
|        |        | 315 | 0.3  | 1.4  | 314 | 2.4  | 6.3  | $\tau$ C51-C52       |
|        |        | 315 | 1.7  | 12.1 | 313 | 1.0  | 0.0  | $\beta$ C39-O136     |
|        |        | 314 | 0.2  | 7.6  | 312 | 1.8  | 1.1  | $\tau$ C117-C126     |
|        |        | 311 | 0.9  | 2.8  | 309 | 0.2  | 1.3  | $\beta$ C103-O104    |
|        |        | 309 | 0.5  | 1.8  | 308 | 0.3  | 1.8  | $\tau$ C3-C40        |
|        |        | 305 | 1.5  | 2.0  | 306 | 0.6  | 4.5  | $\tau$ C2-O135       |
|        | 292 vw | 302 | 0.6  | 2.2  | 302 | 1.5  | 3.4  | $\tau$ C51-C56       |
|        |        | 301 | 0.3  | 4.3  | 301 | 0.6  | 1.3  | $\tau$ C75-C76       |
|        |        | 300 | 0.5  | 0.3  | 295 | 2.0  | 8.2  | $\tau$ C117-C118     |
|        |        | 286 | 0.1  | 2.4  | 284 | 0.1  | 2.5  | $\tau$ C25-N133      |
|        |        | 284 | 0.7  | 0.0  | 283 | 0.4  | 2.7  | $\tau$ C94-N134      |
|        |        | 283 | 0.8  | 0.1  | 282 | 2.3  | 3.6  | $\tau$ C30-C39       |
|        |        | 280 | 0.0  | 0.0  | 281 | 0.1  | 0.4  | $\tau$ C117-C122     |

|        |     |     |      |     |     |      |                   |
|--------|-----|-----|------|-----|-----|------|-------------------|
|        | 275 | 0.2 | 2.3  | 273 | 0.1 | 0.2  | $\tau$ C51-C60    |
|        | 268 | 0.6 | 0.1  | 266 | 0.4 | 0.3  | $\beta$ C68-O140  |
| 264 vw | 262 | 0.3 | 0.2  | 264 | 0.6 | 0.1  | $\tau$ C52-C56    |
|        | 261 | 0.3 | 0.1  | 263 | 0.4 | 0.0  | $\tau$ C6-C10     |
|        | 255 | 0.4 | 1.4  | 262 | 0.2 | 0.4  | $\tau$ C9-C14     |
|        | 252 | 0.4 | 0.2  | 249 | 0.0 | 0.2  | $\tau$ C75-C80    |
|        | 247 | 0.2 | 4.5  | 246 | 0.3 | 0.3  | $\tau$ C91-N134   |
|        | 244 | 0.3 | 0.2  | 239 | 2.7 | 0.0  | $\tau$ C68-O140   |
| 238 vw | 234 | 0.9 | 0.1  | 235 | 0.5 | 0.0  | $\tau$ C44-C45    |
|        | 231 | 1.0 | 0.3  | 233 | 0.0 | 0.7  | $\tau$ C51-C56    |
|        | 230 | 2.6 | 0.5  | 230 | 0.1 | 1.1  | $\tau$ C28-C30    |
|        | 228 | 0.9 | 0.0  | 229 | 0.7 | 0.1  | $\tau$ C117-C118  |
|        | 223 | 1.4 | 0.0  | 227 | 0.4 | 0.6  | $\tau$ C9-C14     |
|        | 220 | 1.6 | 1.5  | 220 | 4.9 | 2.4  | $\tau$ C9-C10     |
|        | 220 | 0.1 | 0.3  | 210 | 0.2 | 0.1  | $\tau$ C75-C76    |
| 209 sh | 210 | 0.7 | 2.5  | 207 | 0.4 | 0.7  | $\tau$ C22-O135   |
|        | 204 | 0.6 | 0.5  | 203 | 0.0 | 0.6  | $\tau$ C25-N133   |
|        | 200 | 0.9 | 1.3  | 198 | 3.7 | 1.0  | $\tau$ C94-N134   |
| 189 w  | 193 | 1.2 | 1.0  | 192 | 0.5 | 7.7  | $\tau$ C94-C96    |
|        | 186 | 0.0 | 0.7  | 188 | 4.8 | 0.1  | $\tau$ C28-C30    |
|        | 183 | 1.9 | 0.8  | 184 | 0.2 | 1.9  | $\tau$ C94-C96    |
|        | 176 | 2.7 | 2.8  | 175 | 6.6 | 3.6  | $\tau$ C96-C105   |
|        | 170 | 1.5 | 1.1  | 173 | 8.9 | 4.7  | $\tau$ C30-C39    |
|        | 169 | 5.2 | 0.1  | 167 | 2.3 | 1.5  | $\tau$ C88-C91    |
|        | 167 | 6.0 | 0.2  | 161 | 1.7 | 3.8  | $\beta$ C37-O38   |
|        | 155 | 0.6 | 0.2  | 154 | 0.3 | 1.4  | $\tau$ C1-C7      |
|        | 136 | 2.2 | 12.7 | 147 | 0.5 | 12.6 | $\beta$ C105-O141 |
|        | 134 | 1.8 | 0.5  | 136 | 2.7 | 1.0  | $\beta$ C103-O104 |
|        | 130 | 1.4 | 4.8  | 136 | 2.0 | 0.2  | $\tau$ C22-C25    |
|        | 124 | 0.2 | 1.4  | 132 | 1.5 | 0.5  | $\tau$ C67-C68    |
|        | 121 | 0.7 | 1.4  | 121 | 0.2 | 6.3  | $\tau$ C25-N133   |
|        | 114 | 1.9 | 1.2  | 121 | 1.1 | 1.5  | $\tau$ C110-C111  |
|        | 107 | 0.4 | 0.4  | 111 | 0.2 | 0.1  | $\tau$ C43-C44    |
|        | 103 | 0.8 | 1.6  | 108 | 0.2 | 5.0  | $\tau$ C48-C49    |
|        | 100 | 0.7 | 3.1  | 104 | 0.4 | 0.3  | $\tau$ C112-C114  |
|        | 99  | 2.7 | 0.1  | 101 | 1.1 | 0.1  | $\tau$ C112-C114  |

---

Abbreviations: v: stretching;  $\delta$ : deformation in plane;  $\rho$ : deformation out of plane;  $\chi$ : torsion; as: antisymmetric; s: symmetric.



**Table S6.** For **6**, a comparison of Experimental and calculated wavenumbers  $\nu$  (cm<sup>-1</sup>), intensity  $I$  (km/mol) of the bands in the IR spectra and relative intensity  $J$  (a.u.) of the lines in the Raman spectra of *exo-exo* and *endo-exo* rotamers.

| IR <sub>exp</sub> |        | Raman <sub>exp</sub> |       |      | Assignment      |       |      |                                            |
|-------------------|--------|----------------------|-------|------|-----------------|-------|------|--------------------------------------------|
| $\nu$             | $\nu$  | <i>exo-exo</i>       |       |      | <i>endo-exo</i> |       |      |                                            |
| $\nu$             | $\nu$  | $\nu$                | $I$   | $J$  | $\nu$           | $I$   | $J$  |                                            |
|                   |        | 3595                 | 58.0  | 0.9  | 3620            | 55.9  | 9.3  | vO118-H137                                 |
|                   |        | 3572                 | 521.7 | 1.4  | 3602            | 57.2  | 3.3  | vO136-H138                                 |
|                   |        | 3462                 | 314.7 | 10.4 | 3444            | 326.5 | 4.3  | vO2-H52                                    |
|                   |        | 3431                 | 408.6 | 3.4  | 3420            | 342.7 | 9.8  | vO1-H51                                    |
| 3386 m            |        | 3146                 | 0.1   | 6.2  | 3145            | 0.1   | 15.6 | vC14-H56                                   |
|                   |        | 3143                 | 0.5   | 0.4  | 3145            | 0.6   | 0.2  | vC1-H54                                    |
|                   |        | 3139                 | 0.1   | 2.1  | 3143            | 1.9   | 1.3  | vC130-H129                                 |
|                   |        | 3139                 | 5.0   | 0.0  | 3141            | 0.1   | 10.3 | vC31-H60                                   |
|                   |        | 3138                 | 0.3   | 2.4  | 3139            | 0.1   | 8.1  | vC26-H59                                   |
|                   |        | 3138                 | 11.2  | 0.1  | 3137            | 8.2   | 19.1 | vC112-H111                                 |
|                   |        | 3126                 | 4.6   | 1.0  | 3127            | 2.8   | 6.0  | vC130-H129                                 |
|                   |        | 3124                 | 1.9   | 0.3  | 3126            | 2.4   | 6.6  | vC17-H57                                   |
|                   |        | 3123                 | 7.3   | 4.4  | 3126            | 1.7   | 0.1  | vC115-H116                                 |
|                   |        | 3119                 | 3.2   | 3.2  | 3122            | 6.9   | 7.4  | vC11-H55                                   |
|                   |        | 3118                 | 1.2   | 0.3  | 3119            | 2.8   | 4.1  | vC6-H53                                    |
|                   |        | 3116                 | 2.1   | 5.7  | 3118            | 0.5   | 1.7  | vC19-H58                                   |
|                   |        | 3116                 | 3.4   | 10.4 | 3116            | 2.1   | 1.3  | vC113-H114                                 |
|                   |        | 3110                 | 2.1   | 0.7  | 3112            | 0.5   | 0.5  | vC130-H129                                 |
|                   |        | 3058                 | 14.1  | 0.7  | 3063            | 10.5  | 3.8  | vC39-H67 v <sub>as</sub> CH <sub>3</sub>   |
|                   |        | 3057                 | 19.4  | 0.3  | 3057            | 19.1  | 0.3  | vC42-H78 v <sub>as</sub> CH <sub>3</sub>   |
|                   |        | 3056                 | 29.9  | 1.0  | 3056            | 24.1  | 1.0  | vC46-H89 v <sub>as</sub> CH <sub>3</sub>   |
| 3062 w            | 3063 w | 3056                 | 25.7  | 0.2  | 3055            | 5.7   | 4.7  | vC44-H84 v <sub>as</sub> CH <sub>3</sub>   |
|                   |        | 3055                 | 13.6  | 0.3  | 3055            | 41.5  | 4.2  | vC37-H62 v <sub>as</sub> CH <sub>3</sub>   |
|                   |        | 3054                 | 14.4  | 7.8  | 3054            | 16.4  | 0.2  | vC46-H89 v <sub>as</sub> CH <sub>3</sub>   |
|                   |        | 3054                 | 23.2  | 0.1  | 3053            | 23.9  | 1.8  | vC43-H80 v <sub>as</sub> CH <sub>3</sub>   |
|                   |        | 3053                 | 11.3  | 0.1  | 3053            | 55.0  | 21.4 | vC41-H75 v <sub>as</sub> CH <sub>3</sub>   |
|                   |        | 3052                 | 71.9  | 1.5  | 3052            | 20.8  | 1.0  | vC39-H68 v <sub>as</sub> CH <sub>3</sub>   |
|                   |        | 3049                 | 15.7  | 0.4  | 3050            | 17.0  | 0.5  | vC38-H64 v <sub>as</sub> CH <sub>3</sub>   |
|                   |        | 3049                 | 68.9  | 0.4  | 3050            | 3.2   | 4.5  | vC38-H65 v <sub>as</sub> CH <sub>3</sub>   |
|                   |        | 3049                 | 101.2 | 0.5  | 3050            | 66.5  | 6.3  | vC40-H72 v <sub>as</sub> CH <sub>3</sub>   |
|                   |        | 3048                 | 42.1  | 1.4  | 3049            | 70.1  | 2.6  | vC45-H85 v <sub>as</sub> CH <sub>3</sub>   |
|                   |        | 3048                 | 14.3  | 0.1  | 3048            | 38.1  | 0.7  | vC47-H92 v <sub>as</sub> CH <sub>3</sub>   |
|                   |        | 3047                 | 28.4  | 0.0  | 3048            | 8.6   | 17.8 | vC45-H87 v <sub>as</sub> CH <sub>2</sub>   |
|                   |        | 3046                 | 2.7   | 0.8  | 3047            | 14.5  | 0.5  | vC40-H71 v <sub>as</sub> CH <sub>3</sub>   |
|                   |        | 3046                 | 40.9  | 0.1  | 3047            | 38.0  | 6.9  | vC39-H69 v <sub>as</sub> CH <sub>3</sub>   |
|                   |        | 3045                 | 1.8   | 1.1  | 3047            | 44.2  | 2.5  | vC47-H91 v <sub>as</sub> CH <sub>3</sub>   |
|                   |        | 3043                 | 3.3   | 0.3  | 3045            | 2.7   | 2.4  | vC48-H94 v <sub>as</sub> CH <sub>3</sub>   |
|                   |        | 3043                 | 2.7   | 0.8  | 3044            | 3.0   | 0.2  | vC37-H61 v <sub>s</sub> CH <sub>3</sub>    |
|                   |        | 3042                 | 1.4   | 1.0  | 3043            | 6.3   | 0.2  | vC42-H77 v <sub>s</sub> CH <sub>3</sub>    |
|                   |        | 3041                 | 5.1   | 1.5  | 3042            | 3.6   | 0.3  | vC44-H82 v <sub>as</sub> CH <sub>3</sub>   |
|                   |        | 3041                 | 0.8   | 5.0  | 3041            | 5.5   | 1.4  | vC43-H81 v <sub>as</sub> CH <sub>3</sub>   |
|                   |        | 3041                 | 4.9   | 1.2  | 3041            | 2.0   | 0.4  | vC41-H73 v <sub>as</sub> CH <sub>3</sub>   |
|                   |        | 3033                 | 8.5   | 0.7  | 3040            | 2.3   | 0.5  | vC50-H99 v <sub>as</sub> CH <sub>2</sub>   |
|                   |        | 3028                 | 13.7  | 4.0  | 3030            | 10.8  | 0.2  | vC49-H97 v <sub>as</sub> CH <sub>2</sub>   |
|                   |        | 3024                 | 20.6  | 1.4  | 3015            | 2.4   | 4.5  | vC119-H120 v <sub>as</sub> CH <sub>2</sub> |

|         |        |      |       |       |      |       |       |                                           |
|---------|--------|------|-------|-------|------|-------|-------|-------------------------------------------|
|         |        | 2994 | 28.3  | 0.6   | 2993 | 25.7  | 1.0   | vC106-H105                                |
|         |        | 2991 | 12.5  | 2.9   | 2980 | 33.3  | 1.0   | vC101-H102 v <sub>s</sub> CH <sub>2</sub> |
|         |        | 2976 | 21.4  | 2.4   | 2979 | 19.0  | 1.3   | vC39-H69 v <sub>s</sub> CH <sub>3</sub>   |
|         | 2981 w | 2973 | 30.3  | 0.4   | 2978 | 14.4  | 2.6   | vC46-H88 v <sub>s</sub> CH <sub>3</sub>   |
|         |        | 2973 | 42.5  | 0.7   | 2974 | 26.9  | 4.0   | vC42-H76 v <sub>s</sub> CH <sub>3</sub>   |
|         |        | 2973 | 12.3  | 0.6   | 2974 | 33.1  | 16.9  | vC45-H85 v <sub>s</sub> CH <sub>3</sub>   |
|         |        | 2970 | 18.4  | 1.1   | 2972 | 22.8  | 8.3   | vC38-H65 v <sub>s</sub> CH <sub>3</sub>   |
|         |        | 2969 | 20.4  | 2.5   | 2971 | 17.2  | 19.7  | vC124-H123                                |
|         |        | 2969 | 15.1  | 0.2   | 2968 | 18.5  | 6.2   | vC46-H90 v <sub>s</sub> CH <sub>3</sub>   |
|         |        | 2967 | 21.3  | 0.1   | 2968 | 25.2  | 0.9   | vC47-H91 v <sub>s</sub> CH <sub>3</sub>   |
|         |        | 2967 | 18.2  | 0.3   | 2967 | 22.6  | 0.8   | vC37-H63 v <sub>s</sub> CH <sub>3</sub>   |
|         |        | 2966 | 24.2  | 0.6   | 2967 | 3.3   | 0.5   | vC41-H74 v <sub>s</sub> CH <sub>3</sub>   |
|         |        | 2966 | 31.3  | 0.4   | 2966 | 19.4  | 0.5   | vC44-H82 v <sub>s</sub> CH <sub>3</sub>   |
|         |        | 2966 | 15.8  | 0.3   | 2966 | 23.1  | 0.5   | vC43-H79 v <sub>s</sub> CH <sub>3</sub>   |
|         | 2968 m | 2966 | 15.7  | 1.7   | 2966 | 22.2  | 0.3   | vC40-H70 v <sub>s</sub> CH <sub>3</sub>   |
| 2962 s  |        | 2955 | 21.1  | 4.7   | 2965 | 16.1  | 0.9   | vC50-H100 v <sub>s</sub> CH <sub>2</sub>  |
|         |        | 2942 | 34.5  | 0.4   | 2953 | 24.4  | 0.5   | vC49-H98 v <sub>s</sub> CH <sub>2</sub>   |
|         |        | 2936 | 35.7  | 2.8   | 2953 | 21.3  | 1.6   | vC101-H102 v <sub>s</sub> CH <sub>2</sub> |
| 2906 m  | 2912 m | 2909 | 20.7  | 1.0   | 2917 | 25.3  | 1.0   | vC119-H121 v <sub>s</sub> CH <sub>2</sub> |
| 2870 m  |        | 2749 | 620.2 | 4.0   | 2673 | 556.1 | 100.0 | vO108-H107                                |
| 2361 vw |        | 2300 | 686.2 | 100.0 | 2345 | 980.6 | 19.8  | vO126-H125                                |
|         |        | 1634 | 22.6  | 24.4  | 1636 | 74.5  | 5.4   | vC106=N104                                |
| 1637 s  | 1640 s | 1631 | 53.4  | 2.4   | 1634 | 5.7   | 5.9   | vC124=N122                                |
|         |        | 1625 | 273.5 | 8.1   | 1627 | 207.0 | 27.7  | vC128-C130                                |
|         |        | 1622 | 105.7 | 7.3   | 1624 | 108.7 | 13.1  | vC106-C110                                |
| 1591 w  | 1593 m | 1606 | 44.4  | 14.0  | 1609 | 41.4  | 1.6   | vC133-C135                                |
|         |        | 1599 | 4.7   | 16.8  | 1607 | 17.6  | 5.0   | vC115-C117                                |
|         |        | 1577 | 4.8   | 10.5  | 1575 | 6.3   | 7.5   | vC6-C7                                    |
|         |        | 1575 | 2.7   | 3.3   | 1574 | 0.8   | 5.9   | vC19-C24                                  |
|         |        | 1570 | 9.2   | 3.6   | 1571 | 5.3   | 13.1  | vC3-C8                                    |
|         | 1566 w | 1565 | 8.2   | 4.5   | 1563 | 7.5   | 9.6   | vC14-C15                                  |
| 1546 w  |        | 1534 | 7.2   | 1.6   | 1534 | 8.8   | 17.1  | vC5-C6                                    |
|         |        | 1530 | 5.6   | 2.1   | 1533 | 2.2   | 39.5  | vC30-C32                                  |
|         |        | 1523 | 9.6   | 5.1   | 1526 | 24.1  | 15.1  | vC13-C17                                  |
|         |        | 1519 | 15.7  | 1.0   | 1520 | 5.2   | 27.0  | vC3-C12                                   |
|         |        | 1516 | 187.4 | 5.7   | 1518 | 261.4 | 9.9   | vC113-C115                                |
|         |        | 1513 | 278.8 | 24.6  | 1512 | 125.5 | 19.8  | vC131-C133                                |
|         |        | 1478 | 21.4  | 1.8   | 1478 | 44.7  | 4.2   | βC37-H62 δ <sub>s</sub> CH <sub>3</sub>   |
| 1467 s  | 1472 m | 1474 | 13.9  | 0.2   | 1475 | 0.3   | 2.2   | vC135-O136                                |
|         |        | 1473 | 48.3  | 3.3   | 1474 | 44.7  | 0.4   | βC40-H71 δ <sub>s</sub> CH <sub>3</sub>   |
|         |        | 1473 | 29.3  | 0.3   | 1473 | 24.8  | 0.3   | βC43-H79 δ <sub>s</sub> CH <sub>3</sub>   |
|         |        | 1472 | 24.3  | 0.5   | 1473 | 39.8  | 0.8   | vC110-C112                                |
|         |        | 1465 | 117.4 | 2.2   | 1469 | 4.2   | 27.7  | βC46-H88 δ <sub>s</sub> CH <sub>3</sub>   |
|         |        | 1459 | 3.8   | 0.2   | 1469 | 62.1  | 10.5  | βC38-H64 δ <sub>s</sub> CH <sub>3</sub>   |
|         |        | 1459 | 9.7   | 1.5   | 1461 | 7.8   | 1.1   | βC44-H82 δ <sub>s</sub> CH <sub>3</sub>   |
|         |        | 1459 | 8.7   | 0.2   | 1459 | 6.9   | 0.3   | βC41-H73 δ <sub>s</sub> CH <sub>3</sub>   |
|         |        | 1459 | 6.2   | 0.1   | 1459 | 6.4   | 0.3   | βC45-H85 δ <sub>s</sub> CH <sub>3</sub>   |
|         |        | 1458 | 62.8  | 9.7   | 1459 | 13.7  | 0.2   | βC40-H70 δ <sub>s</sub> CH <sub>3</sub>   |
|         |        | 1457 | 10.9  | 0.3   | 1457 | 10.8  | 13.7  | βC43-H79 δ <sub>s</sub> CH <sub>3</sub>   |
|         |        | 1456 | 15.6  | 0.3   | 1456 | 20.0  | 0.6   | βC38-H65 δ <sub>s</sub> CH <sub>3</sub>   |
|         |        | 1455 | 10.6  | 0.3   | 1456 | 10.4  | 0.7   | βC48-H94 δ <sub>s</sub> CH <sub>3</sub>   |
| 1451 s  | 1449 m | 1453 | 30.7  | 9.2   | 1455 | 3.7   | 8.2   | vC30-O1                                   |
|         |        | 1453 | 21.6  | 6.9   | 1451 | 44.2  | 1.2   | vO2-C18                                   |

|        |        |      |       |      |      |       |      |                                              |
|--------|--------|------|-------|------|------|-------|------|----------------------------------------------|
|        |        | 1449 | 74.4  | 3.3  | 1447 | 72.1  | 52.6 | $\beta$ C49-H97 $\delta_s$ CH <sub>2</sub>   |
|        |        | 1442 | 7.7   | 2.2  | 1444 | 96.2  | 56.0 | $\beta$ C50-H99 $\delta_s$ CH <sub>2</sub>   |
|        |        | 1441 | 8.5   | 2.9  | 1444 | 4.7   | 12.8 | vC109-C110                                   |
|        |        | 1439 | 3.8   | 0.6  | 1443 | 12.0  | 42.2 | $\beta$ C39-H67 $\delta_s$ CH <sub>3</sub>   |
|        |        | 1439 | 9.3   | 0.2  | 1442 | 63.9  | 4.6  | $\beta$ C38-H66 $\delta_s$ CH <sub>3</sub>   |
|        |        | 1439 | 60.4  | 46.6 | 1440 | 14.2  | 48.4 | $\beta$ C47-H93 $\delta_s$ CH <sub>3</sub>   |
|        |        | 1438 | 5.7   | 15.7 | 1439 | 1.9   | 2.0  | $\beta$ C43-H80 $\delta_s$ CH <sub>3</sub>   |
|        |        | 1438 | 45.4  | 3.3  | 1438 | 1.8   | 6.0  | $\beta$ C37-H63 $\delta_s$ CH <sub>3</sub>   |
|        |        | 1437 | 1.2   | 0.5  | 1438 | 25.7  | 32.0 | $\beta$ C39-H69 $\delta_s$ CH <sub>3</sub>   |
|        |        | 1437 | 0.3   | 0.5  | 1437 | 2.3   | 0.3  | $\beta$ C41-H75 $\delta_s$ CH <sub>3</sub>   |
|        |        | 1436 | 0.2   | 0.3  | 1436 | 0.1   | 0.3  | $\beta$ C43-H81 $\delta_s$ CH <sub>3</sub>   |
|        |        | 1436 | 0.3   | 0.1  | 1436 | 0.2   | 0.2  | $\beta$ C46-H90 $\delta_s$ CH <sub>3</sub>   |
|        |        | 1434 | 43.9  | 31.6 | 1433 | 140.5 | 62.7 | $\beta$ C37-H62 $\delta_s$ CH <sub>3</sub>   |
|        |        | 1433 | 0.1   | 0.3  | 1432 | 0.7   | 4.3  | $\beta$ C41-H75 $\delta_s$ CH <sub>3</sub>   |
|        |        | 1432 | 0.2   | 0.9  | 1432 | 0.1   | 0.0  | $\beta$ C44-H84 $\delta_s$ CH <sub>3</sub>   |
|        |        | 1432 | 0.1   | 0.8  | 1432 | 0.1   | 0.1  | $\beta$ C48-H95 $\delta_s$ CH <sub>3</sub>   |
|        |        | 1432 | 0.2   | 0.0  | 1431 | 27.2  | 3.0  | $\beta$ C119-H120 $\delta_s$ CH <sub>2</sub> |
|        |        | 1424 | 129.3 | 1.9  | 1422 | 38.0  | 7.6  | $\beta$ C49-H98 $\delta_s$ CH <sub>2</sub>   |
|        | 1393 w | 1420 | 47.6  | 0.1  | 1417 | 58.2  | 9.5  | vC21-C22                                     |
| 1391 m |        | 1416 | 71.0  | 0.3  | 1405 | 35.1  | 0.9  | $\beta$ C101-H102 $\delta_s$ CH <sub>2</sub> |
|        |        | 1401 | 100.0 | 10.6 | 1404 | 93.1  | 5.6  | vC112-C113                                   |
|        |        | 1385 | 109.8 | 19.0 | 1399 | 73.8  | 25.1 | vC12-C128                                    |
|        |        | 1380 | 2.3   | 0.1  | 1381 | 3.2   | 3.4  | $\beta$ C39-H68 $\delta_s$ CH <sub>3</sub>   |
|        |        | 1377 | 3.4   | 0.6  | 1378 | 13.8  | 0.9  | $\beta$ C47-H91 $\delta_s$ CH <sub>3</sub>   |
|        |        | 1377 | 6.1   | 5.4  | 1377 | 3.5   | 1.3  | $\beta$ C44-H82 $\delta_s$ CH <sub>3</sub>   |
|        |        | 1377 | 4.7   | 4.7  | 1377 | 4.4   | 4.0  | $\beta$ C42-H78 $\delta_s$ CH <sub>3</sub>   |
|        | 1366 w | 1376 | 28.2  | 0.4  | 1376 | 12.2  | 5.5  | vC6-C7                                       |
| 1364 m |        | 1375 | 12.1  | 1.3  | 1375 | 7.2   | 4.4  | vC19-C24                                     |
|        |        | 1367 | 19.4  | 2.5  | 1370 | 24.2  | 9.6  | vC49-C101                                    |
|        |        | 1366 | 7.3   | 1.2  | 1370 | 20.4  | 0.2  | vC50-C119                                    |
|        |        | 1365 | 14.8  | 0.7  | 1368 | 14.2  | 6.0  | vC8-C9                                       |
|        |        | 1360 | 47.1  | 4.8  | 1364 | 15.8  | 2.0  | vC14-C15                                     |
|        |        | 1356 | 61.8  | 10.2 | 1359 | 62.3  | 2.6  | $\beta$ C49-H97 wag CH <sub>2</sub>          |
|        |        | 1348 | 110.9 | 0.3  | 1354 | 37.6  | 41.9 | $\beta$ C50-H99 wag CH <sub>2</sub>          |
|        |        | 1347 | 6.5   | 6.9  | 1347 | 45.2  | 41.0 | $\beta$ C37-H63 $\delta_s$ CH <sub>3</sub>   |
|        |        | 1345 | 10.6  | 0.0  | 1346 | 7.6   | 0.6  | $\beta$ C40-H71 $\delta_s$ CH <sub>3</sub>   |
|        | 1341 w | 1343 | 3.4   | 0.2  | 1344 | 9.5   | 4.2  | $\beta$ C46-H90 $\delta_s$ CH <sub>3</sub>   |
|        |        | 1342 | 10.3  | 2.1  | 1343 | 8.1   | 0.3  | $\beta$ C42-H77 $\delta_s$ CH <sub>3</sub>   |
|        |        | 1342 | 9.7   | 0.4  | 1342 | 10.3  | 0.4  | $\beta$ C41-H74 $\delta_s$ CH <sub>3</sub>   |
|        |        | 1342 | 29.7  | 12.2 | 1342 | 9.5   | 1.2  | $\beta$ C43-H79 $\delta_s$ CH <sub>3</sub>   |
|        |        | 1341 | 11.8  | 0.1  | 1342 | 6.3   | 8.5  | $\beta$ C38-H66 $\delta_s$ CH <sub>3</sub>   |
|        |        | 1339 | 37.4  | 0.1  | 1340 | 42.0  | 29.6 | $\beta$ C47-H92 $\delta_s$ CH <sub>3</sub>   |
|        |        | 1339 | 14.4  | 1.7  | 1339 | 0.9   | 1.8  | $\beta$ O2-H52                               |
|        |        | 1338 | 13.5  | 15.6 | 1339 | 10.4  | 3.4  | $\beta$ O1-H51                               |
|        |        | 1326 | 78.0  | 2.8  | 1327 | 85.0  | 3.8  | $\beta$ C119-H121 wag CH <sub>2</sub>        |
|        |        | 1320 | 14.5  | 15.1 | 1321 | 60.3  | 4.4  | $\beta$ C101-H103 wag CH <sub>2</sub>        |
|        |        | 1312 | 55.0  | 35.2 | 1314 | 22.9  | 33.4 | vC127-O126                                   |
|        |        | 1305 | 23.9  | 20.6 | 1312 | 43.0  | 4.0  | vC109-O108                                   |
|        |        | 1305 | 9.9   | 6.0  | 1310 | 4.4   | 19.1 | v15-C21                                      |
|        | 1287 m | 1302 | 6.0   | 19.9 | 1301 | 3.2   | 8.2  | vC3-C8                                       |
|        |        | 1290 | 3.8   | 8.4  | 1287 | 5.0   | 28.0 | vO2-C18                                      |
|        |        | 1285 | 7.7   | 3.6  | 1282 | 8.3   | 14.6 | vO1-C30                                      |
|        | 1270 s | 1283 | 48.8  | 9.6  | 1275 | 165.6 | 10.5 | $\beta$ C106-H105                            |
|        |        | 1276 | 129.4 | 0.5  | 1274 | 74.9  | 27.3 | vC135-O136                                   |
|        |        | 1273 | 5.7   | 6.7  | 1268 | 6.1   | 0.4  | $\beta$ C49-H98 wag CH <sub>2</sub>          |

|         |         |         |       |       |      |       |       |                                        |                                          |
|---------|---------|---------|-------|-------|------|-------|-------|----------------------------------------|------------------------------------------|
| 1245 s  |         | 1252    | 248.7 | 11.2  | 1254 | 185.2 | 18.1  | $\beta$ C50-H100 wag CH <sub>2</sub>   |                                          |
|         |         | 1249    | 4.5   | 0.6   | 1252 | 49.5  | 4.3   | $\beta$ C19-H58                        |                                          |
|         |         | 1245    | 99.6  | 5.6   | 1247 | 63.2  | 43.8  | $\beta$ C31-H60                        |                                          |
|         |         | 1243    | 27.8  | 3.1   | 1244 | 90.0  | 13.2  | vC10-C33                               |                                          |
|         |         | 1241    | 86.4  | 9.9   | 1241 | 50.6  | 9.3   | vC13-C36                               |                                          |
|         |         | 1237    | 20.8  | 2.9   | 1237 | 1.7   | 83.6  | vC5-C34                                |                                          |
|         |         | 1236    | 44.3  | 0.2   | 1236 | 73.9  | 4.3   | vC28-C35                               |                                          |
|         |         | 1224 m  | 1229  | 90.3  | 10.5 | 1231  | 23.6  | 0.9                                    | $\beta$ C112-H111                        |
|         |         | 1209 vw | 1222  | 169.3 | 0.6  | 1227  | 110.7 | 15.3                                   | $\beta$ O136-H138                        |
|         |         |         | 1219  | 23.2  | 24.1 | 1224  | 30.8  | 6.5                                    | $\beta$ C14-H56                          |
|         |         |         | 1210  | 56.1  | 4.9  | 1212  | 73.2  | 2.6                                    | $\beta$ O118-H137                        |
|         |         |         | 1206  | 11.4  | 3.9  | 1210  | 76.9  | 1.4                                    | vC3-O20                                  |
|         |         |         | 1200  | 1.8   | 0.9  | 1205  | 10.0  | 2.5                                    | vC21-O4                                  |
|         |         |         | 1198  | 0.9   | 0.1  | 1203  | 26.9  | 2.0                                    | $\beta$ C101-H102 $\rho$ CH <sub>2</sub> |
|         |         |         | 1198  | 1.9   | 2.4  | 1202  | 58.2  | 7.9                                    | $\beta$ C50-H100 $\rho$ CH <sub>2</sub>  |
|         |         |         | 1194  | 7.2   | 2.5  | 1197  | 4.2   | 2.0                                    | $\beta$ C9-H54                           |
|         |         |         | 1193  | 0.1   | 1.4  | 1195  | 23.0  | 0.2                                    | $\beta$ C17-H57                          |
|         |         |         | 1191  | 43.4  | 0.7  | 1193  | 3.2   | 4.5                                    | vC35-C44                                 |
|         |         |         | 1189  | 4.8   | 0.2  | 1193  | 13.7  | 0.4                                    | vC34-C41                                 |
|         |         |         | 1189  | 1.2   | 0.8  | 1189  | 11.8  | 0.3                                    | vC36-C47                                 |
|         |         | 1189    | 5.3   | 0.6   | 1189 | 3.8   | 0.6   | vC34-C40                               |                                          |
|         |         | 1188    | 6.8   | 0.2   | 1188 | 4.3   | 0.3   | vC35-C44                               |                                          |
|         |         | 1186    | 4.3   | 0.1   | 1188 | 1.8   | 13.0  | vC34-C42                               |                                          |
| 1166 w  | 1168 vw | 1185    | 3.4   | 0.6   | 1187 | 3.6   | 6.7   | vC15-C21                               |                                          |
|         |         | 1175    | 197.6 | 6.5   | 1186 | 1.0   | 1.7   | $\beta$ C14-H56                        |                                          |
|         |         | 1151    | 43.5  | 26.8  | 1153 | 2.7   | 1.1   | $\beta$ C112-H111                      |                                          |
|         |         | 1148 sh | 1150  | 4.5   | 0.3  | 1152  | 36.9  | 9.2                                    | $\beta$ C130-H129                        |
|         |         | 1141 w  | 1148  | 11.1  | 1.6  | 1150  | 1.8   | 2.7                                    | $\beta$ C26-H59                          |
|         |         |         | 1142  | 55.1  | 0.3  | 1144  | 44.1  | 2.7                                    | $\beta$ O1-H51                           |
|         |         |         | 1124  | 0.4   | 1.5  | 1127  | 1.5   | 14.2                                   | vC8-S25                                  |
|         |         |         | 1118  | 1.8   | 2.0  | 1119  | 0.2   | 82.8                                   | vC12-S29                                 |
|         |         |         | 1118  | 1.8   | 0.4  | 1117  | 1.9   | 1.4                                    | C28-C35                                  |
|         |         |         | 1115  | 0.5   | 0.3  | 1114  | 0.6   | 7.5                                    | vC13-C36                                 |
| 1092 m  | 1099 sh | 1093    | 38.2  | 4.4   | 1105 | 24.9  | 0.5   | vC119-N122                             |                                          |
|         |         | 1078 vw | 1089  | 29.6  | 0.1  | 1081  | 15.3  | 1.7                                    | vC101-N104                               |
|         |         | 1069    | 31.0  | 6.0   | 1066 | 44.2  | 87.4  | vC49-C101                              |                                          |
|         | 1074 w  | 1067    | 47.7  | 7.9   | 1064 | 9.4   | 4.4   | vC50-C119                              |                                          |
| 1068 vw |         | 1060    | 15.9  | 0.3   | 1061 | 9.1   | 0.5   | vC50-O4                                |                                          |
|         |         | 1059    | 2.1   | 0.8   | 1059 | 1.1   | 39.8  | vC49-O20                               |                                          |
|         |         | 1057    | 3.6   | 3.4   | 1058 | 19.0  | 26.3  | vC131-C133                             |                                          |
|         |         | 1056    | 9.5   | 5.6   | 1056 | 5.2   | 11.3  | vC7-S25                                |                                          |
|         |         | 1052    | 16.6  | 3.2   | 1047 | 15.9  | 1.0   | vC32-S29                               |                                          |
| 1034 sh | 1028 w  | 1048    | 23.3  | 5.2   | 1045 | 10.3  | 0.7   | vC15-S16                               |                                          |
|         |         | 1016 m  | 1042  | 10.6  | 4.4  | 1042  | 49.7  | 1.6                                    | vC3-O20                                  |
|         |         | 1038    | 36.8  | 0.4   | 1029 | 11.9  | 12.1  | vC50-O4                                |                                          |
|         |         | 1034    | 32.7  | 1.8   | 1025 | 30.2  | 7.1   | vC106-C110                             |                                          |
|         |         | 1020    | 99.9  | 4.1   | 1016 | 0.1   | 0.3   | vC135-O136                             |                                          |
|         |         | 1015    | 0.1   | 0.1   | 1015 | 0.2   | 0.5   | $\beta$ C39-H67 $\rho$ CH <sub>3</sub> |                                          |
|         |         | 1015    | 0.0   | 0.4   | 1014 | 0.0   | 0.1   | $\beta$ C47-H92 $\rho$ CH <sub>3</sub> |                                          |
|         |         | 1014    | 0.0   | 0.1   | 1014 | 0.0   | 0.5   | $\beta$ C41-H73 $\rho$ CH <sub>3</sub> |                                          |
|         |         | 1014    | 0.1   | 0.1   | 1012 | 0.3   | 1.7   | $\beta$ C43-H79 $\rho$ CH <sub>3</sub> |                                          |
|         |         | 1011    | 3.2   | 1.6   | 1011 | 33.3  | 8.0   | $\beta$ C38-H64 $\rho$ CH <sub>3</sub> |                                          |
|         |         | 1010    | 2.0   | 0.6   | 1010 | 60.2  | 1.9   | $\beta$ C47-H91 $\rho$ CH <sub>3</sub> |                                          |
| 974 sh  |         | 1009    | 0.7   | 1.6   | 1010 | 5.1   | 0.1   | $\beta$ C40-H70 $\rho$ CH <sub>3</sub> |                                          |

|        |        |      |       |      |      |       |      |                                        |
|--------|--------|------|-------|------|------|-------|------|----------------------------------------|
|        |        | 1009 | 0.8   | 0.7  | 1009 | 0.6   | 0.3  | $\beta$ C45-H85 $\rho$ CH <sub>3</sub> |
|        |        | 1002 | 151.5 | 43.0 | 1001 | 94.0  | 7.9  | $\beta$ O126-H125                      |
|        |        | 956  | 17.7  | 0.4  | 959  | 4.1   | 4.6  | $\beta$ O108-H107                      |
|        |        | 950  | 4.7   | 6.2  | 958  | 20.6  | 1.0  | $\gamma$ C106-H105                     |
|        | 930 vw | 944  | 45.5  | 0.0  | 949  | 109.9 | 0.5  | $\gamma$ C124-H123                     |
|        |        | 930  | 0.1   | 0.5  | 939  | 22.2  | 0.1  | $\gamma$ C112-H111                     |
|        |        | 929  | 11.5  | 0.9  | 930  | 0.1   | 26.9 | $\gamma$ C130-H129                     |
| 925 sh |        | 928  | 0.5   | 0.4  | 928  | 0.2   | 0.1  | $\beta$ C39-H68 $\rho$ CH <sub>3</sub> |
|        |        | 927  | 0.0   | 0.1  | 927  | 0.1   | 0.3  | $\beta$ C47-H92 $\rho$ CH <sub>3</sub> |
|        |        | 927  | 0.1   | 0.0  | 927  | 0.4   | 0.2  | $\beta$ C40-H72 $\rho$ CH <sub>3</sub> |
|        |        | 927  | 2.0   | 0.1  | 927  | 11.4  | 0.9  | $\beta$ C44-H84 $\rho$ CH <sub>3</sub> |
|        |        | 919  | 0.8   | 0.1  | 921  | 84.3  | 0.6  | $\beta$ C50-H99 $\rho$ CH <sub>2</sub> |
|        |        | 918  | 0.9   | 0.2  | 920  | 2.0   | 11.5 | $\beta$ C39-H68 $\rho$ CH <sub>3</sub> |
|        |        | 917  | 2.0   | 0.7  | 918  | 17.5  | 0.3  | $\beta$ C48-H94 $\rho$ CH <sub>3</sub> |
|        |        | 917  | 1.9   | 0.3  | 917  | 2.1   | 0.4  | vC34-C40                               |
|        |        | 914  | 19.4  | 0.9  | 917  | 2.2   | 3.2  | vC35-C43                               |
|        |        | 908  | 2.2   | 0.3  | 909  | 20.2  | 0.9  | $\beta$ C49-H97 $\rho$ CH <sub>2</sub> |
|        | 904 w  | 907  | 1.3   | 0.6  | 908  | 18.4  | 20.6 | vC36-C48                               |
|        |        | 906  | 1.5   | 0.1  | 907  | 0.6   | 7.9  | vC33-C39                               |
|        |        | 906  | 1.9   | 0.3  | 906  | 1.7   | 1.1  | vC35-C44                               |
|        |        | 903  | 25.3  | 18.4 | 906  | 1.4   | 0.7  | vC34-C41                               |
|        |        | 893  | 30.0  | 2.1  | 889  | 0.0   | 0.4  | vC10-C33                               |
|        |        | 889  | 3.1   | 0.2  | 888  | 2.4   | 0.2  | $\gamma$ C6-H53                        |
| 886 w  |        | 889  | 11.0  | 0.6  | 887  | 3.1   | 4.9  | $\gamma$ C31-H60                       |
|        |        | 888  | 0.5   | 0.3  | 886  | 4.8   | 10.3 | vC50-C119                              |
|        |        | 886  | 0.7   | 0.4  | 885  | 17.0  | 51.6 | vC24-S23                               |
| 874 w  |        | 884  | 0.8   | 7.8  | 883  | 2.8   | 3.8  | vC5-C34                                |
|        |        | 883  | 5.7   | 0.6  | 882  | 3.8   | 1.7  | $\gamma$ C11-H55                       |
|        |        | 872  | 0.1   | 0.3  | 870  | 10.6  | 3.8  | $\gamma$ C14-H56                       |
|        |        | 869  | 11.4  | 0.4  | 866  | 9.9   | 0.3  | $\gamma$ C26-H59                       |
|        |        | 866  | 10.1  | 0.0  | 864  | 7.1   | 0.6  | $\gamma$ C19-H58                       |
|        |        | 864  | 17.5  | 0.5  | 863  | 0.4   | 2.7  | $\gamma$ C115-H116                     |
|        | 857 vw | 863  | 5.4   | 0.1  | 858  | 1.7   | 0.6  | $\gamma$ C133-H134                     |
| 850 vw |        | 863  | 19.9  | 0.6  | 857  | 0.1   | 4.2  | $\gamma$ C9-H54                        |
|        | 829 m  | 858  | 2.1   | 1.7  | 853  | 43.6  | 31.4 | $\gamma$ C130-H129                     |
| 823 vw |        | 857  | 11.9  | 0.1  | 847  | 24.0  | 0.9  | vC13-C36                               |
|        |        | 857  | 3.8   | 0.0  | 845  | 4.1   | 4.5  | vC49-O20                               |
|        |        | 842  | 9.2   | 8.6  | 842  | 1.9   | 2.2  | vC127-O126                             |
| 808 sh | 813 w  | 841  | 32.4  | 1.1  | 840  | 13.5  | 3.5  | vC109-O108                             |
|        |        | 814  | 12.9  | 0.2  | 814  | 14.0  | 11.8 | vC30-O1                                |
|        |        | 813  | 16.4  | 0.2  | 813  | 18.8  | 5.3  | vC18-O2                                |
|        |        | 798  | 2.6   | 3.6  | 798  | 10.0  | 10.6 | vC21-O4                                |
| 781 w  |        | 797  | 11.8  | 1.8  | 788  | 7.2   | 0.8  | $\beta$ O2-H52                         |
|        |        | 774  | 3.6   | 24.2 | 773  | 4.5   | 46.4 | $\beta$ O1-H51                         |
|        | 770 vw | 773  | 7.0   | 2.2  | 771  | 6.3   | 2.8  | vC7-S25                                |
|        |        | 767  | 15.9  | 5.6  | 766  | 4.9   | 0.3  | vC8-S25                                |
|        |        | 765  | 13.7  | 2.1  | 765  | 6.7   | 0.2  | vC24-S23                               |
| 763 sh |        | 764  | 7.3   | 0.4  | 762  | 12.0  | 10.1 | vC32-S29                               |
|        |        | 763  | 0.2   | 1.2  | 760  | 9.0   | 1.4  | vC12-S29                               |
|        |        | 757  | 2.1   | 5.6  | 757  | 8.5   | 0.6  | vC22-S23                               |
|        |        | 749  | 7.2   | 6.4  | 751  | 8.9   | 14.4 | $\beta$ <sub>R</sub>                   |
|        |        | 737  | 16.5  | 0.1  | 735  | 16.4  | 3.0  | $\beta$ <sub>R</sub>                   |
| 735 m  |        | 736  | 12.0  | 0.1  | 735  | 18.4  | 5.9  | $\beta$ O2-H52                         |
|        | 731 w  | 724  | 62.5  | 2.0  | 729  | 45.9  | 0.7  | vC7-C18                                |

|        |        |     |      |      |     |      |      |                      |
|--------|--------|-----|------|------|-----|------|------|----------------------|
|        |        | 722 | 27.9 | 12.9 | 723 | 17.0 | 4.0  | vC30-C32             |
|        |        | 721 | 17.4 | 1.9  | 720 | 13.8 | 0.2  | $\gamma$ C115-H116   |
|        |        | 715 | 40.0 | 0.2  | 718 | 65.6 | 1.4  | $\gamma$ C113-H114   |
|        |        | 713 | 23.6 | 0.2  | 711 | 9.9  | 1.2  | $\gamma$ C109-O108   |
|        |        | 709 | 17.7 | 3.2  | 709 | 20.6 | 2.2  | vC106-C110           |
|        |        | 700 | 46.3 | 3.7  | 693 | 10.9 | 0.5  | vC5-C34              |
|        |        | 692 | 7.2  | 1.0  | 691 | 4.0  | 5.5  | vC28-C35             |
|        |        | 691 | 1.2  | 1.1  | 685 | 39.1 | 2.1  | vC13-C36             |
| 641 vw |        | 651 | 88.7 | 1.2  | 652 | 98.4 | 1.1  | vC33-C37             |
|        |        | 634 | 2.1  | 0.2  | 635 | 1.7  | 10.6 | vC19-C28             |
|        |        | 632 | 0.5  | 0.5  | 633 | 0.7  | 0.3  | vC10-C11             |
|        | 624 vw | 629 | 2.3  | 0.1  | 630 | 3.8  | 0.3  | vC10-C33             |
|        |        | 626 | 1.2  | 0.2  | 625 | 0.1  | 3.6  | vC9-C10              |
|        |        | 620 | 5.5  | 0.4  | 623 | 3.9  | 0.3  | vC124-C128           |
|        |        | 618 | 3.0  | 18.0 | 617 | 7.2  | 3.3  | vC106-C110           |
| 585 sh |        | 596 | 3.8  | 0.4  | 598 | 4.0  | 4.2  | $\gamma$ C8-S25      |
|        |        | 584 | 15.8 | 1.1  | 581 | 7.0  | 1.0  | $\gamma$ C30-O1      |
| 576 w  |        | 581 | 7.6  | 1.9  | 577 | 10.7 | 0.3  | $\gamma$ C117-O118   |
|        |        | 576 | 7.0  | 0.3  | 575 | 3.1  | 2.1  | $\gamma$ C110-C106   |
|        |        | 571 | 60.6 | 0.2  | 572 | 19.8 | 0.5  | $\beta$ <sub>R</sub> |
|        |        | 568 | 14.1 | 1.6  | 569 | 3.5  | 1.2  | $\beta$ <sub>R</sub> |
|        |        | 565 | 1.2  | 0.3  | 565 | 7.1  | 0.8  | $\beta$ <sub>R</sub> |
| 545 w  |        | 559 | 32.4 | 0.6  | 560 | 68.0 | 0.5  | $\beta$ <sub>R</sub> |
|        |        | 556 | 17.5 | 2.0  | 557 | 5.1  | 8.1  | $\beta$ <sub>R</sub> |
|        |        | 553 | 2.8  | 1.8  | 553 | 9.1  | 0.2  | $\beta$ <sub>R</sub> |
| 535 sh |        | 552 | 7.4  | 2.0  | 549 | 16.2 | 4.9  | $\beta$ <sub>R</sub> |
|        | 529 w  | 543 | 23.2 | 3.6  | 540 | 48.6 | 1.6  | $\beta$ <sub>R</sub> |
|        |        | 540 | 27.0 | 2.1  | 534 | 4.8  | 1.9  | $\beta$ <sub>R</sub> |
|        |        | 537 | 3.5  | 1.7  | 532 | 21.9 | 13.0 | $\gamma$ C22-S23     |
|        |        | 533 | 6.8  | 2.3  | 525 | 0.3  | 6.7  | $\gamma$ C24-S23     |
|        |        | 526 | 1.0  | 7.9  | 519 | 21.3 | 0.1  | $\gamma$ C124-C128   |
|        | 493 vw | 521 | 0.2  | 0.4  | 513 | 50.1 | 9.6  | $\gamma$ O118-H137   |
|        |        | 507 | 0.6  | 1.7  | 508 | 1.1  | 2.2  | vC34-C41             |
|        |        | 505 | 0.4  | 0.4  | 507 | 0.2  | 2.6  | vC34-C42             |
|        |        | 500 | 1.3  | 2.7  | 505 | 0.5  | 0.8  | $\beta$ <sub>R</sub> |
|        |        | 488 | 1.8  | 0.5  | 501 | 8.8  | 1.7  | $\beta$ <sub>R</sub> |
|        | 472 vw | 487 | 0.4  | 3.2  | 491 | 0.9  | 1.0  | $\beta$ <sub>R</sub> |
|        |        | 485 | 5.6  | 3.1  | 482 | 6.0  | 4.0  | $\beta$ <sub>R</sub> |
|        |        | 480 | 0.9  | 14.2 | 480 | 1.1  | 1.6  | $\beta$ <sub>R</sub> |
|        |        | 475 | 1.2  | 1.0  | 475 | 0.2  | 13.4 | $\beta$ <sub>R</sub> |
|        | 447 vw | 473 | 2.0  | 3.5  | 474 | 2.9  | 1.0  | $\beta$ <sub>R</sub> |
|        |        | 471 | 1.4  | 0.4  | 472 | 0.2  | 0.4  | $\beta$ <sub>R</sub> |
|        |        | 465 | 1.2  | 0.5  | 466 | 1.8  | 23.5 | $\beta$ <sub>R</sub> |
|        |        | 461 | 2.6  | 8.1  | 464 | 0.9  | 0.8  | vC36-C47             |
|        | 409 vw | 451 | 0.4  | 1.2  | 456 | 2.3  | 10.2 | $\beta$ <sub>R</sub> |
|        |        | 438 | 1.1  | 20.4 | 436 | 0.7  | 1.6  | $\beta$ <sub>R</sub> |
|        | 393 sh | 434 | 0.4  | 5.3  | 434 | 0.1  | 0.6  | $\gamma$ C18-O2      |
|        |        | 433 | 0.1  | 0.1  | 419 | 1.2  | 3.5  | $\beta$ <sub>R</sub> |
|        |        | 415 | 1.0  | 14.0 | 413 | 0.8  | 4.9  | $\beta$ <sub>R</sub> |
|        |        | 405 | 1.5  | 3.5  | 404 | 1.7  | 4.2  | $\gamma$ C15-S16     |
|        |        | 394 | 1.6  | 8.3  | 394 | 1.7  | 0.4  | $\gamma$ C27-S16     |
|        |        | 389 | 0.0  | 19.0 | 388 | 0.1  | 1.6  | $\gamma$ C12-S29     |
|        |        | 384 | 2.8  | 0.5  | 387 | 1.1  | 37.2 | $\beta$ <sub>R</sub> |
|        |        | 384 | 1.4  | 3.1  | 384 | 4.1  | 5.2  | $\gamma$ C7-S25      |
|        |        | 381 | 3.1  | 10.3 | 382 | 1.5  | 2.1  | $\beta$ <sub>R</sub> |

|        |     |     |      |     |     |      |                    |
|--------|-----|-----|------|-----|-----|------|--------------------|
|        | 378 | 0.8 | 2.4  | 375 | 0.7 | 4.8  | $\beta_R$          |
|        | 376 | 2.0 | 2.5  | 373 | 0.6 | 4.4  | $\beta_R$          |
|        | 373 | 0.6 | 0.1  | 368 | 0.4 | 21.7 | $\beta_R$          |
|        | 361 | 0.4 | 6.4  | 360 | 0.5 | 15.2 | $\beta_R$          |
|        | 359 | 1.5 | 9.9  | 358 | 0.3 | 22.7 | $\beta_R$          |
|        | 354 | 0.2 | 0.2  | 355 | 0.1 | 0.7  | $\beta_R$          |
|        | 352 | 2.0 | 17.6 | 350 | 1.5 | 4.6  | $\beta_R$          |
|        | 349 | 0.5 | 0.2  | 347 | 6.2 | 37.9 | $\beta_R$          |
|        | 343 | 9.8 | 9.6  | 345 | 2.4 | 16.7 | $\gamma C127-O126$ |
|        | 341 | 1.3 | 15.1 | 344 | 3.7 | 9.1  | $\gamma C109-O108$ |
|        | 328 | 6.2 | 2.8  | 329 | 1.3 | 17.8 | $\beta_R$          |
|        | 326 | 1.8 | 8.9  | 327 | 1.1 | 5.1  | $\beta_R$          |
|        | 323 | 1.3 | 0.5  | 325 | 2.2 | 1.0  | $\beta_R$          |
|        | 320 | 1.6 | 0.3  | 322 | 0.4 | 25.1 | $\gamma C30-O1$    |
|        | 317 | 2.6 | 1.1  | 321 | 0.3 | 3.0  | $\beta C35-C45$    |
|        | 317 | 3.4 | 0.7  | 317 | 0.2 | 0.5  | $\tau C33-C38$     |
|        | 315 | 0.3 | 0.0  | 312 | 3.5 | 13.0 | $\tau C33-C37$     |
|        | 312 | 0.1 | 0.2  | 312 | 0.7 | 0.3  | $\tau C35-C45$     |
|        | 311 | 0.5 | 1.7  | 311 | 2.0 | 0.6  | $\tau C36-C47$     |
|        | 311 | 0.1 | 1.3  | 310 | 0.1 | 1.3  | $\tau C34-C40$     |
|        | 308 | 1.8 | 5.0  | 302 | 3.1 | 0.3  | $\beta_R$          |
|        | 304 | 0.2 | 2.9  | 299 | 6.5 | 8.8  | $\tau C35-C43$     |
|        | 303 | 0.8 | 0.1  | 295 | 1.3 | 0.4  | $\gamma C21-O4$    |
|        | 297 | 2.9 | 1.3  | 294 | 0.2 | 7.9  | $\gamma C3-O20$    |
| 288 vw | 288 | 2.5 | 3.7  | 290 | 0.3 | 0.8  | $\beta_R$          |
|        | 286 | 1.4 | 0.9  | 286 | 0.2 | 2.7  | $\tau C124-C128$   |
|        | 286 | 0.4 | 0.9  | 283 | 0.0 | 0.4  | $\tau C106-C110$   |
|        | 283 | 0.3 | 0.8  | 282 | 0.5 | 2.4  | $\tau C10-C33$     |
|        | 279 | 0.1 | 1.5  | 280 | 1.2 | 4.0  | $\gamma C117-O118$ |
|        | 276 | 0.8 | 0.6  | 277 | 3.2 | 5.7  | $\tau C49-C101$    |
|        | 275 | 0.8 | 4.6  | 270 | 0.2 | 9.1  | $\tau C5-C34$      |
|        | 267 | 0.5 | 0.3  | 268 | 0.6 | 12.9 | $\tau C22-S23$     |
|        | 265 | 0.3 | 10.8 | 265 | 2.8 | 0.1  | $\tau C12-S29$     |
|        | 261 | 0.8 | 5.4  | 264 | 1.3 | 7.1  | $\tau C33-C37$     |
|        | 258 | 0.3 | 0.3  | 260 | 1.4 | 0.9  | $\tau C34-C41$     |
|        | 256 | 0.0 | 0.0  | 258 | 0.1 | 9.1  | $\tau C35-C44$     |
|        | 254 | 0.1 | 2.7  | 257 | 0.1 | 2.6  | $\tau C35-C43$     |
| 245 vw | 247 | 0.7 | 8.5  | 254 | 0.5 | 6.7  | $\tau C36-C48$     |
|        | 242 | 2.0 | 15.7 | 241 | 3.7 | 0.5  | $\tau C36-C46$     |
| 227 w  | 234 | 1.3 | 2.8  | 236 | 0.2 | 0.9  | $\tau C28-C35$     |
|        | 231 | 0.6 | 0.2  | 233 | 0.1 | 5.8  | $\beta_R$          |
|        | 228 | 0.2 | 3.0  | 228 | 0.3 | 0.9  | $\tau C33-C39$     |
|        | 225 | 0.0 | 0.3  | 226 | 0.5 | 3.0  | $\tau C34-C42$     |
|        | 223 | 0.1 | 1.8  | 225 | 0.1 | 3.0  | $\tau C36-C48$     |
|        | 223 | 0.4 | 0.0  | 223 | 0.9 | 17.6 | $\tau C34-C42$     |
|        | 216 | 0.2 | 4.0  | 222 | 3.4 | 8.7  | $\tau C106-C110$   |
|        | 212 | 0.1 | 2.2  | 217 | 1.2 | 1.4  | $\gamma C106-N104$ |
|        | 202 | 2.0 | 1.1  | 215 | 1.0 | 0.8  | $\gamma C124-N122$ |
|        | 196 | 3.4 | 16.7 | 209 | 0.3 | 0.5  | $\gamma C27-S16$   |
|        | 191 | 0.5 | 0.2  | 201 | 0.3 | 2.1  | $\gamma C15-S16$   |
| 187 w  | 186 | 0.8 | 0.6  | 192 | 0.1 | 1.2  | $\tau C10-C33$     |
|        | 183 | 2.6 | 0.4  | 180 | 1.1 | 4.5  | $\nu C22-S23$      |
|        | 172 | 4.2 | 1.6  | 174 | 1.8 | 0.6  | $\beta_R$          |
|        | 171 | 3.3 | 0.7  | 172 | 0.3 | 3.9  | $\tau C30-C32$     |
|        | 167 | 0.5 | 1.5  | 169 | 3.5 | 0.4  | $\tau C109-C110$   |
|        | 155 | 1.9 | 8.8  | 167 | 1.3 | 1.0  | $\tau C15-S16$     |

|     |     |      |     |     |      |                  |
|-----|-----|------|-----|-----|------|------------------|
| 149 | 1.1 | 16.2 | 158 | 0.3 | 2.5  | $\tau$ C32-S29   |
| 145 | 0.3 | 7.5  | 154 | 0.4 | 2.7  | $\tau$ C8-S25    |
| 140 | 2.0 | 0.9  | 140 | 1.4 | 4.2  | $\tau$ C27-S16   |
| 139 | 0.3 | 10.7 | 138 | 2.9 | 25.0 | $\tau$ C21-O4    |
| 125 | 5.2 | 30.9 | 127 | 1.4 | 0.9  | $\tau$ C119-N122 |
| 121 | 2.4 | 42.2 | 120 | 2.5 | 7.5  | $\tau$ C3-O20    |
| 120 | 0.6 | 0.3  | 118 | 1.7 | 2.6  | $\tau$ C18-O2    |
| 114 | 0.4 | 9.1  | 115 | 1.0 | 25.5 | $\tau$ C33-C38   |
| 107 | 0.5 | 3.1  | 108 | 1.7 | 5.1  | $\tau$ C28-C35   |
| 104 | 0.6 | 0.4  | 104 | 1.0 | 6.3  | $\tau$ C24-S23   |

---

Abbreviations: v: stretching;  $\delta$ : deformation in plane;  $\rho$ : deformation out of plane;  $\chi$ : torsion; as: antisymmetric; s: symmetric.



## 8. DFT-optimized coordinates of atoms for ligands 3-6.

**Table S7.** For **3** *exo-exo* rotamer, the optimized geometry in Cartesian coordinates, obtained by DFT- calculations.

| Center Number | Atomic number | Coordinates (Angstroms) |          |          |
|---------------|---------------|-------------------------|----------|----------|
|               |               | X                       | Y        | Z        |
| 1             | 6             | 3,44091                 | 8,72556  | 4,84784  |
| 2             | 6             | 2,93869                 | 8,37322  | 6,10771  |
| 3             | 6             | 3,53403                 | 8,83414  | 7,29485  |
| 4             | 6             | 4,61187                 | 9,71577  | 7,19417  |
| 5             | 1             | 5,07697                 | 10,06456 | 8,12159  |
| 6             | 6             | 5,11822                 | 10,14025 | 5,95593  |
| 7             | 6             | 4,52002                 | 9,62047  | 4,80343  |
| 8             | 1             | 4,91327                 | 9,88608  | 3,81977  |
| 9             | 6             | 6,3119                  | 11,10946 | 5,90864  |
| 10            | 6             | 5,94761                 | 12,41428 | 6,65339  |
| 11            | 1             | 6,80289                 | 13,11098 | 6,63964  |
| 12            | 1             | 5,68488                 | 12,22241 | 7,7054   |
| 13            | 1             | 5,08882                 | 12,91141 | 6,17404  |
| 14            | 6             | 7,53002                 | 10,44759 | 6,59497  |
| 15            | 1             | 8,39492                 | 11,13237 | 6,57635  |
| 16            | 1             | 7,81051                 | 9,51755  | 6,07493  |
| 17            | 1             | 7,31698                 | 10,19618 | 7,64562  |
| 18            | 6             | 6,71281                 | 11,47487 | 4,46771  |
| 19            | 1             | 7,56312                 | 12,17581 | 4,49124  |
| 20            | 1             | 5,88641                 | 11,96594 | 3,92836  |
| 21            | 1             | 7,02611                 | 10,5868  | 3,89511  |
| 22            | 6             | 0,5609                  | 8,02351  | 6,14133  |
| 23            | 1             | 0,45058                 | 8,58754  | 5,19796  |
| 24            | 1             | 0,3795                  | 8,71591  | 6,98492  |
| 25            | 6             | -0,41857                | 6,84923  | 6,17917  |
| 26            | 1             | -0,19687                | 6,16014  | 5,34109  |
| 27            | 1             | -0,2625                 | 6,30087  | 7,12702  |
| 28            | 6             | -2,58503                | 6,88691  | 5,23218  |
| 29            | 1             | -2,24645                | 6,13746  | 4,48997  |
| 30            | 6             | -3,96161                | 7,32779  | 5,1428   |
| 31            | 6             | -4,81393                | 6,81081  | 4,1472   |
| 32            | 1             | -4,40876                | 6,06933  | 3,4502   |
| 33            | 6             | -6,13531                | 7,22319  | 4,04873  |
| 34            | 1             | -6,78768                | 6,81612  | 3,27357  |
| 35            | 6             | -6,6239                 | 8,17297  | 4,96232  |
| 36            | 1             | -7,66379                | 8,50468  | 4,89302  |
| 37            | 6             | -5,80987                | 8,70082  | 5,957    |
| 38            | 1             | -6,18504                | 9,43853  | 6,67033  |
| 39            | 6             | -4,46778                | 8,29159  | 6,0687   |
| 40            | 6             | 3,08064                 | 8,32382  | 8,65714  |
| 41            | 1             | 3,11298                 | 9,15779  | 9,37669  |
| 42            | 1             | 2,03124                 | 7,98959  | 8,60267  |
| 43            | 6             | 3,9603                  | 7,20234  | 9,19222  |
| 44            | 6             | 3,89059                 | 5,89618  | 8,66547  |
| 45            | 6             | 4,77958                 | 4,90451  | 9,14343  |
| 46            | 6             | 5,66295                 | 5,22005  | 10,17452 |

|    |   |          |         |          |
|----|---|----------|---------|----------|
| 47 | 1 | 6,32116  | 4,4256  | 10,54289 |
| 48 | 6 | 5,73768  | 6,50184 | 10,74426 |
| 49 | 6 | 4,87974  | 7,47185 | 10,21653 |
| 50 | 1 | 4,90082  | 8,48964 | 10,6152  |
| 51 | 6 | 6,73097  | 6,78568 | 11,88325 |
| 52 | 6 | 6,65785  | 8,24364 | 12,37208 |
| 53 | 1 | 5,6573   | 8,49101 | 12,76268 |
| 54 | 1 | 6,90425  | 8,95483 | 11,56673 |
| 55 | 1 | 7,38407  | 8,39541 | 13,18737 |
| 56 | 6 | 6,42169  | 5,86027 | 13,08276 |
| 57 | 1 | 5,40429  | 6,04452 | 13,46394 |
| 58 | 1 | 7,13806  | 6,04194 | 13,90233 |
| 59 | 1 | 6,49064  | 4,7976  | 12,80189 |
| 60 | 6 | 8,17237  | 6,51705 | 11,39026 |
| 61 | 1 | 8,89724  | 6,71027 | 12,19961 |
| 62 | 1 | 8,41979  | 7,17142 | 10,53873 |
| 63 | 1 | 8,30046  | 5,4727  | 11,06449 |
| 64 | 6 | 4,79591  | 3,5333  | 8,48696  |
| 65 | 1 | 5,21791  | 2,80408 | 9,19883  |
| 66 | 1 | 3,76657  | 3,23082 | 8,24984  |
| 67 | 6 | 5,63372  | 3,52525 | 7,21203  |
| 68 | 6 | 5,06405  | 3,40994 | 5,93665  |
| 69 | 6 | 5,83442  | 3,54333 | 4,76886  |
| 70 | 6 | 7,21145  | 3,72998 | 4,90544  |
| 71 | 1 | 7,80509  | 3,84454 | 3,99303  |
| 72 | 6 | 7,83737  | 3,80113 | 6,15938  |
| 73 | 6 | 7,02205  | 3,70707 | 7,29198  |
| 74 | 1 | 7,46074  | 3,80796 | 8,28689  |
| 75 | 6 | 9,35812  | 4,01596 | 6,24486  |
| 76 | 6 | 9,71902  | 5,36221 | 5,57382  |
| 77 | 1 | 9,21765  | 6,19851 | 6,08683  |
| 78 | 1 | 9,41508  | 5,38417 | 4,5157   |
| 79 | 1 | 10,80876 | 5,52824 | 5,61919  |
| 80 | 6 | 10,08316 | 2,86441 | 5,51096  |
| 81 | 1 | 9,7907   | 2,80983 | 4,45071  |
| 82 | 1 | 9,84948  | 1,89426 | 5,97879  |
| 83 | 1 | 11,17516 | 3,01503 | 5,5537   |
| 84 | 6 | 9,8636   | 4,0528  | 7,69867  |
| 85 | 1 | 9,41243  | 4,8828  | 8,26636  |
| 86 | 1 | 10,95598 | 4,19959 | 7,70209  |
| 87 | 1 | 9,64974  | 3,10926 | 8,22708  |
| 88 | 6 | 3,20476  | 1,90162 | 5,79504  |
| 89 | 1 | 3,69985  | 1,33738 | 6,60607  |
| 90 | 1 | 3,44467  | 1,40999 | 4,83244  |
| 91 | 6 | 1,69997  | 1,89531 | 6,04982  |
| 92 | 1 | 1,39645  | 0,84655 | 6,25363  |
| 93 | 1 | 1,51429  | 2,49224 | 6,96091  |
| 94 | 6 | -0,00201 | 1,76242 | 4,41765  |
| 95 | 1 | -0,199   | 0,72147 | 4,74821  |
| 96 | 6 | -0,86028 | 2,28253 | 3,37236  |
| 97 | 6 | -1,84794 | 1,46612 | 2,787    |
| 98 | 1 | -1,93494 | 0,42875 | 3,12666  |
| 99 | 6 | -2,69671 | 1,95536 | 1,80402  |

|     |   |          |         |          |
|-----|---|----------|---------|----------|
| 100 | 1 | -3,45637 | 1,31155 | 1,35647  |
| 101 | 6 | -2,56463 | 3,29188 | 1,39178  |
| 102 | 1 | -3,22489 | 3,68658 | 0,61451  |
| 103 | 6 | -1,60309 | 4,12513 | 1,9519   |
| 104 | 1 | -1,48827 | 5,16245 | 1,62796  |
| 105 | 6 | -0,73452 | 3,63932 | 2,94668  |
| 106 | 6 | 5,1887   | 3,57913 | 3,38943  |
| 107 | 1 | 5,82881  | 3,02714 | 2,68226  |
| 108 | 1 | 4,21639  | 3,05929 | 3,41239  |
| 109 | 6 | 5,00695  | 4,99434 | 2,86079  |
| 110 | 6 | 4,01783  | 5,85159 | 3,39216  |
| 111 | 6 | 3,91354  | 7,17487 | 2,91408  |
| 112 | 6 | 4,76177  | 7,60293 | 1,8885   |
| 113 | 1 | 4,63938  | 8,62657 | 1,52431  |
| 114 | 6 | 5,74093  | 6,77389 | 1,32553  |
| 115 | 6 | 5,83945  | 5,4752  | 1,84603  |
| 116 | 1 | 6,59087  | 4,78812 | 1,44169  |
| 117 | 6 | 6,68018  | 7,22747 | 0,19528  |
| 118 | 6 | 6,47359  | 6,32587 | -1,04389 |
| 119 | 1 | 5,43714  | 6,40044 | -1,41063 |
| 120 | 1 | 6,67478  | 5,26816 | -0,81199 |
| 121 | 1 | 7,1533   | 6,63035 | -1,85832 |
| 122 | 6 | 8,14873  | 7,11675 | 0,66768  |
| 123 | 1 | 8,3233   | 7,75599 | 1,5482   |
| 124 | 1 | 8,83533  | 7,4353  | -0,13542 |
| 125 | 1 | 8,40815  | 6,08252 | 0,94348  |
| 126 | 6 | 6,42354  | 8,68591 | -0,22586 |
| 127 | 1 | 6,58707  | 9,38505 | 0,61066  |
| 128 | 1 | 5,3969   | 8,82533 | -0,60192 |
| 129 | 1 | 7,1184   | 8,96288 | -1,03558 |
| 130 | 6 | 2,909    | 8,11963 | 3,5533   |
| 131 | 1 | 1,97949  | 7,56983 | 3,7562   |
| 132 | 1 | 2,68485  | 8,93247 | 2,8423   |
| 133 | 7 | -1,78475 | 7,34026 | 6,14012  |
| 134 | 7 | 0,92967  | 2,47134 | 4,96095  |
| 135 | 8 | 1,8846   | 7,45972 | 6,21785  |
| 136 | 8 | -3,69734 | 8,80724 | 7,03055  |
| 137 | 1 | -2,77721 | 8,36091 | 6,91626  |
| 138 | 8 | 2,99999  | 5,50072 | 7,72217  |
| 139 | 1 | 2,543    | 6,2564  | 7,27096  |
| 140 | 8 | 3,67646  | 3,25987 | 5,80454  |
| 141 | 8 | 0,18029  | 4,45973 | 3,47621  |
| 142 | 1 | 0,71028  | 3,90467 | 4,15336  |
| 143 | 8 | 3,12782  | 5,48391 | 4,34516  |
| 144 | 1 | 3,32077  | 4,60148 | 4,74908  |

**Table S8.** For **3** *endo-exo* rotamer, the optimized geometry in Cartesian coordinates, obtained by DFT- calculations.

| Center Number | Atomic number | Coordinates (Angstroms) |          |          |
|---------------|---------------|-------------------------|----------|----------|
|               |               | X                       | Y        | Z        |
| 1             | 8             | -0,04947                | -1,72933 | -0,89585 |
| 2             | 8             | -0,27331                | 1,67654  | -0,59336 |
| 3             | 6             | 0,31603                 | -0,26092 | 2,10697  |
| 4             | 8             | 0,2037                  | 0,32594  | -3,90174 |
| 5             | 6             | 2,12761                 | 4,9714   | 0,37975  |
| 6             | 6             | 1,52442                 | 4,21352  | 1,3877   |
| 7             | 6             | 0,73355                 | 3,08693  | 1,11436  |
| 8             | 6             | 0,80157                 | 0,97146  | 2,56176  |
| 9             | 6             | 1,98739                 | 0,96471  | 3,31025  |
| 10            | 6             | 2,68274                 | -0,21398 | 3,60237  |
| 11            | 6             | 2,16455                 | -1,41621 | 3,09525  |
| 12            | 6             | 0,99002                 | -1,47126 | 2,34037  |
| 13            | 6             | 4,06613                 | 0,44869  | -2,24047 |
| 14            | 6             | 3,27779                 | 1,59815  | -2,32238 |
| 15            | 6             | 1,94791                 | 1,5706   | -2,76371 |
| 16            | 6             | 1,13991                 | 2,86426  | -2,68796 |
| 17            | 6             | 3,43892                 | -0,76675 | -2,54238 |
| 18            | 6             | 0,53241                 | 2,70931  | -0,22446 |
| 19            | 6             | 2,19099                 | -4,26419 | 0,56688  |
| 20            | 8             | -0,85319                | -0,28078 | 1,31052  |
| 21            | 6             | 1,39094                 | 0,34814  | -3,18187 |
| 22            | 6             | 2,11762                 | -0,84603 | -2,98837 |
| 23            | 6             | 0,504                   | -2,80669 | 1,7808   |
| 24            | 6             | 1,21949                 | -3,25293 | 0,51214  |
| 25            | 6             | 0,10589                 | 2,29534  | 2,25393  |
| 26            | 6             | 1,94093                 | 4,53098  | -0,94318 |
| 27            | 6             | 1,17665                 | 3,41127  | -1,26911 |
| 28            | 6             | 2,88265                 | -4,70488 | -0,56525 |
| 29            | 6             | 1,49362                 | -2,22969 | -3,16669 |
| 30            | 6             | 0,92552                 | -2,6646  | -0,72974 |
| 31            | 6             | 2,5934                  | -4,05501 | -1,77896 |
| 32            | 6             | 1,65029                 | -3,0336  | -1,88566 |
| 33            | 6             | 3,96236                 | -0,23332 | 4,45631  |
| 34            | 6             | 2,97615                 | 6,22226  | 0,66324  |
| 35            | 6             | 3,93066                 | -5,82961 | -0,52401 |
| 36            | 6             | 5,5351                  | 0,46866  | -1,78784 |
| 37            | 6             | 5,11428                 | -0,88065 | 3,65391  |
| 38            | 6             | 3,69982                 | -1,06142 | 5,73613  |
| 39            | 6             | 4,40563                 | 1,17956  | 4,87722  |
| 40            | 6             | 4,41187                 | 6,00614  | 0,13027  |
| 41            | 6             | 2,34625                 | 7,44284  | -0,04708 |
| 42            | 6             | 3,06719                 | 6,53747  | 2,16734  |
| 43            | 6             | 5,29779                 | -5,28074 | -0,99519 |
| 44            | 6             | 4,11046                 | -6,40859 | 0,89104  |
| 45            | 6             | 3,49041                 | -6,97766 | -1,46165 |
| 46            | 6             | 6,04502                 | 1,89715  | -1,52361 |
| 47            | 6             | 5,67868                 | -0,3463  | -0,48155 |

|     |   |          |          |          |
|-----|---|----------|----------|----------|
| 48  | 6 | 6,42005  | -0,16425 | -2,88627 |
| 49  | 7 | -4,46872 | -0,78917 | 1,79743  |
| 50  | 7 | -3,41936 | -0,13513 | -3,69265 |
| 51  | 6 | -5,50074 | -0,05413 | 1,54444  |
| 52  | 6 | -4,3911  | 0,64855  | -4,01714 |
| 53  | 6 | -6,75519 | -0,23811 | 2,24324  |
| 54  | 6 | -5,69759 | 0,52909  | -3,39895 |
| 55  | 6 | -7,86368 | 0,58035  | 1,94623  |
| 56  | 6 | -9,07209 | 0,41943  | 2,6084   |
| 57  | 6 | -9,18559 | -0,58031 | 3,59007  |
| 58  | 6 | -8,11309 | -1,4054  | 3,90459  |
| 59  | 6 | -6,88119 | -1,25294 | 3,24151  |
| 60  | 6 | -5,91856 | -0,45256 | -2,38347 |
| 61  | 6 | -7,19278 | -0,54506 | -1,79312 |
| 62  | 6 | -8,21599 | 0,30635  | -2,19463 |
| 63  | 6 | -8,00774 | 1,27496  | -3,19083 |
| 64  | 6 | -6,75513 | 1,37663  | -3,78101 |
| 65  | 8 | -5,85958 | -2,05474 | 3,55742  |
| 66  | 8 | -4,94009 | -1,27182 | -1,98288 |
| 67  | 6 | -2,08809 | -0,45471 | 2,06049  |
| 68  | 6 | -3,23909 | -0,56845 | 1,0613   |
| 69  | 6 | -1,05602 | 0,19403  | -3,21976 |
| 70  | 6 | -2,11558 | 0,02519  | -4,31017 |
| 71  | 1 | -0,36241 | -1,35756 | -0,03816 |
| 72  | 1 | -0,52767 | 1,11076  | 0,17144  |
| 73  | 1 | 1,6499   | 4,50129  | 2,43492  |
| 74  | 1 | 2,36659  | 1,92545  | 3,66558  |
| 75  | 1 | 2,69191  | -2,35616 | 3,28399  |
| 76  | 1 | 3,68421  | 2,56307  | -2,01086 |
| 77  | 1 | 1,57051  | 3,62011  | -3,36728 |
| 78  | 1 | 0,10984  | 2,67834  | -3,02399 |
| 79  | 1 | 3,98239  | -1,70605 | -2,40134 |
| 80  | 1 | 2,38934  | -4,72289 | 1,5392   |
| 81  | 1 | 0,66433  | -3,57762 | 2,55164  |
| 82  | 1 | -0,58409 | -2,77059 | 1,60183  |
| 83  | 1 | 0,1418   | 2,91847  | 3,16217  |
| 84  | 1 | -0,96248 | 2,12034  | 2,04135  |
| 85  | 1 | 2,42449  | 5,06943  | -1,76532 |
| 86  | 1 | 1,99693  | -2,76939 | -3,98733 |
| 87  | 1 | 0,4367   | -2,12423 | -3,45039 |
| 88  | 1 | 3,13602  | -4,33901 | -2,68705 |
| 89  | 1 | 4,60954  | -1,09441 | 6,35895  |
| 90  | 1 | 3,41491  | -2,09784 | 5,49649  |
| 91  | 1 | 2,88818  | -0,61434 | 6,33259  |
| 92  | 1 | 6,03022  | -0,90808 | 4,26767  |
| 93  | 1 | 5,3272   | -0,30587 | 2,73886  |
| 94  | 1 | 4,87713  | -1,91358 | 3,35575  |
| 95  | 1 | 5,32781  | 1,10903  | 5,47635  |
| 96  | 1 | 4,62086  | 1,81536  | 4,00313  |
| 97  | 1 | 3,64338  | 1,67954  | 5,4968   |
| 98  | 1 | 5,02945  | 6,90039  | 0,32113  |
| 99  | 1 | 4,41819  | 5,81722  | -0,95455 |
| 100 | 1 | 4,8867   | 5,14462  | 0,6272   |

|     |   |           |          |          |
|-----|---|-----------|----------|----------|
| 101 | 1 | 2,95242   | 8,34678  | 0,13463  |
| 102 | 1 | 1,32655   | 7,62781  | 0,32755  |
| 103 | 1 | 2,28411   | 7,28924  | -1,13575 |
| 104 | 1 | 3,67985   | 7,44147  | 2,31706  |
| 105 | 1 | 2,07308   | 6,72992  | 2,60293  |
| 106 | 1 | 3,54179   | 5,71494  | 2,72722  |
| 107 | 1 | 6,05828   | -6,08    | -0,97588 |
| 108 | 1 | 5,63717   | -4,46361 | -0,33793 |
| 109 | 1 | 5,24561   | -4,89037 | -2,0236  |
| 110 | 1 | 4,86523   | -7,21151 | 0,86653  |
| 111 | 1 | 3,17227   | -6,84153 | 1,2749   |
| 112 | 1 | 4,45992   | -5,64233 | 1,6024   |
| 113 | 1 | 4,24063   | -7,78678 | -1,45498 |
| 114 | 1 | 2,52468   | -7,39713 | -1,1366  |
| 115 | 1 | 3,37568   | -6,62998 | -2,50021 |
| 116 | 1 | 7,1041    | 1,85902  | -1,21957 |
| 117 | 1 | 5,4798    | 2,38845  | -0,71497 |
| 118 | 1 | 5,97542   | 2,52468  | -2,42714 |
| 119 | 1 | 6,72932   | -0,34464 | -0,14333 |
| 120 | 1 | 5,3654    | -1,39306 | -0,61919 |
| 121 | 1 | 5,05307   | 0,08927  | 0,31415  |
| 122 | 1 | 7,477     | -0,1698  | -2,56915 |
| 123 | 1 | 6,12255   | -1,2036  | -3,09555 |
| 124 | 1 | 6,343     | 0,40659  | -3,8258  |
| 125 | 1 | -5,46733  | 0,74202  | 0,77544  |
| 126 | 1 | -4,26227  | 1,4429   | -4,77967 |
| 127 | 1 | -7,75152  | 1,34692  | 1,17264  |
| 128 | 1 | -9,9241   | 1,0598   | 2,37141  |
| 129 | 1 | -10,13409 | -0,71506 | 4,11755  |
| 130 | 1 | -8,19605  | -2,18489 | 4,66564  |
| 131 | 1 | -7,35208  | -1,2995  | -1,01897 |
| 132 | 1 | -9,19898  | 0,21416  | -1,72411 |
| 133 | 1 | -8,82069  | 1,93609  | -3,49791 |
| 134 | 1 | -6,56906  | 2,12311  | -4,56043 |
| 135 | 1 | -5,0846   | -1,76606 | 2,95119  |
| 136 | 1 | -4,12325  | -1,02929 | -2,57078 |
| 137 | 1 | -2,01863  | -1,3673  | 2,67663  |
| 138 | 1 | -2,23268  | 0,40927  | 2,73226  |
| 139 | 1 | -3,28389  | 0,33916  | 0,42571  |
| 140 | 1 | -3,05783  | -1,43147 | 0,39494  |
| 141 | 1 | -1,2729   | 1,08551  | -2,60863 |
| 142 | 1 | -1,05123  | -0,68106 | -2,55207 |
| 143 | 1 | -2,08804  | 0,88926  | -5,00473 |
| 144 | 1 | -1,88003  | -0,88464 | -4,89163 |

**Table S9.** For 4 *exo-exo* rotamer, the optimized geometry in Cartesian coordinates, obtained by DFT- calculations.

| Center Number | Atomic number | Coordinates (Angstroms) |          |          |
|---------------|---------------|-------------------------|----------|----------|
|               |               | X                       | Y        | Z        |
| 1             | 8             | -1,11379                | 0,2754   | 0,54935  |
| 2             | 8             | 1,45367                 | -2,19743 | 0,24407  |
| 3             | 6             | 1,52631                 | 0,13578  | 2,73524  |
| 4             | 8             | -1,07485                | -1,7449  | -2,20659 |
| 5             | 6             | 5,47829                 | -2,77084 | -0,84766 |
| 6             | 6             | 4,41896                 | -2,89271 | -1,7641  |
| 7             | 6             | 3,08719                 | -2,67701 | -1,40968 |
| 8             | 6             | 2,89952                 | -0,15419 | 2,61475  |
| 9             | 6             | 3,8259                  | 0,88983  | 2,60065  |
| 10            | 6             | 3,43225                 | 2,23514  | 2,69807  |
| 11            | 6             | 2,06432                 | 2,49775  | 2,83747  |
| 12            | 6             | 1,11157                 | 1,47022  | 2,85959  |
| 13            | 6             | 1,84826                 | 1,16131  | -3,1281  |
| 14            | 6             | 2,17642                 | -0,19648 | -3,1037  |
| 15            | 6             | 1,23199                 | -1,18455 | -2,79175 |
| 16            | 16            | 3,45845                 | -1,87576 | 2,5799   |
| 17            | 6             | 0,51964                 | 1,50037  | -2,83582 |
| 18            | 6             | 2,74767                 | -2,34124 | -0,07406 |
| 19            | 6             | -2,12636                | 3,48568  | -0,86131 |
| 20            | 8             | 0,5925                  | -0,88864 | 2,64005  |
| 21            | 6             | -0,11058                | -0,83898 | -2,53981 |
| 22            | 6             | -0,44396                | 0,53481  | -2,5429  |
| 23            | 16            | -2,13083                | 1,04907  | -2,16315 |
| 24            | 6             | -1,82019                | 2,12766  | -0,76507 |
| 25            | 16            | 1,8021                  | -2,8942  | -2,64451 |
| 26            | 6             | 5,14082                 | -2,39375 | 0,45504  |
| 27            | 6             | 3,80943                 | -2,17997 | 0,84202  |
| 28            | 6             | -1,97372                | 4,38     | 0,21363  |
| 29            | 16            | -0,63712                | 1,84765  | 3,12803  |
| 30            | 6             | -1,34915                | 1,59344  | 0,46097  |
| 31            | 6             | -1,46452                | 3,85349  | 1,40406  |
| 32            | 6             | -1,1514                 | 2,49227  | 1,53005  |
| 33            | 6             | 4,49594                 | 3,34593  | 2,69086  |
| 34            | 6             | 6,92486                 | -3,02508 | -1,30173 |
| 35            | 6             | -2,346                  | 5,86167  | 0,04142  |
| 36            | 6             | 2,86793                 | 2,26276  | -3,46116 |
| 37            | 6             | 5,42364                 | 3,16326  | 3,91476  |
| 38            | 6             | 5,33068                 | 3,25042  | 1,39316  |
| 39            | 6             | 3,86929                 | 4,75019  | 2,75921  |
| 40            | 6             | 7,93437                 | -2,83053 | -0,15625 |
| 41            | 6             | 7,28825                 | -2,04288 | -2,43953 |
| 42            | 6             | 7,05108                 | -4,47696 | -1,81813 |
| 43            | 6             | -3,8473                 | 5,9726   | -0,31187 |
| 44            | 6             | -1,50416                | 6,47708  | -1,1004  |
| 45            | 6             | -2,08938                | 6,67633  | 1,32185  |
| 46            | 6             | 4,27206                 | 1,69323  | -3,73297 |
| 47            | 6             | 2,40164                 | 3,0293   | -4,72026 |
| 48            | 6             | 2,96465                 | 3,24354  | -2,26952 |

|     |   |          |          |          |
|-----|---|----------|----------|----------|
| 49  | 6 | 0,28471  | -1,53909 | 3,90502  |
| 50  | 6 | -1,43519 | -2,73768 | -3,18241 |
| 51  | 1 | -0,80477 | 0,05898  | 1,4632   |
| 52  | 1 | 1,3571   | -1,91735 | 1,18812  |
| 53  | 1 | 4,61837  | -3,15828 | -2,80583 |
| 54  | 1 | 4,88322  | 0,62697  | 2,51731  |
| 55  | 1 | 1,7016   | 3,52148  | 2,9405   |
| 56  | 1 | 3,19759  | -0,52319 | -3,30487 |
| 57  | 1 | 0,20416  | 2,54671  | -2,83353 |
| 58  | 1 | -2,50014 | 3,84098  | -1,82545 |
| 59  | 1 | 5,91108  | -2,26671 | 1,21762  |
| 60  | 1 | -1,30658 | 4,48999  | 2,27632  |
| 61  | 1 | 4,66931  | 5,50735  | 2,73236  |
| 62  | 1 | 3,19978  | 4,9376   | 1,90399  |
| 63  | 1 | 3,30065  | 4,89999  | 3,69134  |
| 64  | 1 | 6,10561  | 4,03496  | 1,38783  |
| 65  | 1 | 4,69312  | 3,38858  | 0,50558  |
| 66  | 1 | 5,83643  | 2,27669  | 1,30126  |
| 67  | 1 | 6,19982  | 3,94665  | 3,91933  |
| 68  | 1 | 4,85263  | 3,23705  | 4,85426  |
| 69  | 1 | 5,92982  | 2,18529  | 3,89935  |
| 70  | 1 | 8,95296  | -3,02752 | -0,52803 |
| 71  | 1 | 7,91421  | -1,79959 | 0,2335   |
| 72  | 1 | 7,7422   | -3,52444 | 0,67833  |
| 73  | 1 | 8,32178  | -2,22185 | -2,78117 |
| 74  | 1 | 6,62117  | -2,16181 | -3,30758 |
| 75  | 1 | 7,21369  | -0,99913 | -2,09366 |
| 76  | 1 | 6,37025  | -4,66792 | -2,66236 |
| 77  | 1 | 8,08098  | -4,6704  | -2,16287 |
| 78  | 1 | 6,81182  | -5,19746 | -1,01951 |
| 79  | 1 | -4,12792 | 7,03002  | -0,45422 |
| 80  | 1 | -4,08657 | 5,43009  | -1,23971 |
| 81  | 1 | -4,46957 | 5,554    | 0,49528  |
| 82  | 1 | -1,76912 | 7,53902  | -1,2386  |
| 83  | 1 | -1,67759 | 5,9598   | -2,05691 |
| 84  | 1 | -0,42827 | 6,41584  | -0,86934 |
| 85  | 1 | -2,37328 | 7,72741  | 1,15071  |
| 86  | 1 | -1,02513 | 6,65934  | 1,60907  |
| 87  | 1 | -2,68678 | 6,30161  | 2,16892  |
| 88  | 1 | 4,9644   | 2,51983  | -3,96185 |
| 89  | 1 | 4,27189  | 1,0077   | -4,59601 |
| 90  | 1 | 4,66823  | 1,15259  | -2,85789 |
| 91  | 1 | 3,11669  | 3,83385  | -4,96254 |
| 92  | 1 | 1,41156  | 3,48781  | -4,57189 |
| 93  | 1 | 2,33541  | 2,35197  | -5,58685 |
| 94  | 1 | 3,69292  | 4,04171  | -2,49318 |
| 95  | 1 | 1,99491  | 3,71817  | -2,05286 |
| 96  | 1 | 3,29275  | 2,7144   | -1,3602  |
| 97  | 1 | -0,3314  | -0,85595 | 4,51535  |
| 98  | 1 | 1,23186  | -1,75594 | 4,42773  |
| 99  | 1 | -1,59993 | -2,26225 | -4,16686 |
| 100 | 1 | -0,64338 | -3,50298 | -3,27242 |
| 101 | 6 | -0,43903 | -2,85504 | 3,64741  |



|     |   |          |          |          |
|-----|---|----------|----------|----------|
| 102 | 1 | -0,35349 | -3,45923 | 4,57589  |
| 103 | 1 | 0,10561  | -3,39462 | 2,85103  |
| 104 | 7 | -1,82565 | -2,6891  | 3,25021  |
| 105 | 1 | -2,45844 | -3,90109 | 4,83338  |
| 106 | 6 | -2,73157 | -3,29125 | 3,94715  |
| 107 | 1 | -2,78978 | -2,01159 | 2,07358  |
| 108 | 8 | -3,71874 | -1,86338 | 1,67502  |
| 109 | 6 | -4,58147 | -2,51511 | 2,46627  |
| 110 | 6 | -4,1387  | -3,23175 | 3,61821  |
| 111 | 1 | -4,72825 | -4,44834 | 5,29985  |
| 112 | 6 | -5,08479 | -3,90112 | 4,42087  |
| 113 | 6 | -6,43605 | -3,87463 | 4,11039  |
| 114 | 1 | -7,1605  | -4,3962  | 4,73907  |
| 115 | 6 | -6,85992 | -3,17042 | 2,9704   |
| 116 | 1 | -7,92224 | -3,14686 | 2,71239  |
| 117 | 6 | -5,95362 | -2,50138 | 2,15689  |
| 118 | 1 | -6,28355 | -1,95807 | 1,26816  |
| 119 | 6 | -2,72014 | -3,40453 | -2,69384 |
| 120 | 1 | -2,56771 | -3,70083 | -1,63726 |
| 121 | 1 | -2,872   | -4,3193  | -3,29196 |
| 122 | 7 | -3,87952 | -2,54169 | -2,85602 |
| 123 | 1 | -3,75162 | -1,84337 | -0,87879 |
| 124 | 1 | -4,96963 | -2,14253 | -3,95553 |
| 125 | 6 | -4,25638 | -1,80689 | -1,86066 |
| 126 | 8 | -5,80626 | -1,61207 | -4,2547  |
| 127 | 6 | -6,13256 | -0,85392 | -3,2043  |
| 128 | 6 | -5,38713 | -0,90673 | -1,98693 |
| 129 | 1 | -5,15016 | -0,11362 | -0,00119 |
| 130 | 6 | -5,7546  | -0,0727  | -0,91321 |
| 131 | 6 | -6,84045 | 0,78815  | -1,01196 |
| 132 | 1 | -7,11404 | 1,43382  | -0,17468 |
| 133 | 6 | -7,5789  | 0,82187  | -2,20703 |
| 134 | 1 | -8,43699 | 1,49467  | -2,29484 |
| 135 | 6 | -7,23553 | 0,01776  | -3,28757 |
| 136 | 1 | -7,8017  | 0,0447   | -4,22191 |

**Table S10.** For 4 *endo-exo* rotamer, the optimized geometry in Cartesian coordinates, obtained by DFT- calculations.

| Center Number | Atomic number | Coordinates (Angstroms) |          |          |
|---------------|---------------|-------------------------|----------|----------|
|               |               | X                       | Y        | Z        |
| 1             | 8             | -1,35312                | -1,42661 | -0,35518 |
| 2             | 8             | 1,46614                 | 0,63233  | -1,31772 |
| 3             | 6             | -1,72311                | 1,41913  | -2,22873 |
| 4             | 8             | 2,06189                 | -2,03665 | 1,43899  |
| 5             | 6             | 3,41032                 | 4,32103  | -0,76354 |
| 6             | 6             | 2,3739                  | 4,19347  | -1,69267 |
| 7             | 6             | 1,69728                 | 2,97863  | -1,8767  |
| 8             | 6             | -1,09039                | 2,67469  | -2,31178 |
| 9             | 6             | -1,71801                | 3,80057  | -1,77512 |
| 10            | 6             | -2,96577                | 3,72381  | -1,13501 |
| 11            | 6             | -3,57946                | 2,46609  | -1,06963 |
| 12            | 6             | -2,98046                | 1,31967  | -1,609   |
| 13            | 6             | 0,08987                 | 1,3606   | 2,97447  |
| 14            | 6             | 1,32899                 | 1,47322  | 2,33712  |
| 15            | 6             | 1,96397                 | 0,36126  | 1,76795  |
| 16            | 16            | 3,5195                  | 0,56517  | 0,87552  |
| 17            | 6             | -0,50908                | 0,09346  | 3,00136  |
| 18            | 6             | 2,04643                 | 1,83128  | -1,13605 |
| 19            | 6             | -3,47817                | -2,05155 | 2,54827  |
| 20            | 8             | -1,07489                | 0,27629  | -2,67976 |
| 21            | 6             | 1,38574                 | -0,91595 | 1,85243  |
| 22            | 6             | 0,10575                 | -1,02058 | 2,42838  |
| 23            | 16            | -0,77039                | -2,59829 | 2,35257  |
| 24            | 6             | -2,34315                | -1,97951 | 1,73985  |
| 25            | 16            | 0,48202                 | 2,84251  | -3,1967  |
| 26            | 6             | 3,71456                 | 3,18517  | 0,00843  |
| 27            | 6             | 3,05467                 | 1,96579  | -0,14816 |
| 28            | 6             | -4,73578                | -1,57335 | 2,13853  |
| 29            | 16            | -3,87495                | -0,25563 | -1,63192 |
| 30            | 6             | -2,43817                | -1,42975 | 0,43665  |
| 31            | 6             | -4,80277                | -0,97451 | 0,87683  |
| 32            | 6             | -3,68073                | -0,89371 | 0,04001  |
| 33            | 6             | -3,63641                | 5,00324  | -0,60549 |
| 34            | 6             | 4,18537                 | 5,63068  | -0,54496 |
| 35            | 6             | -5,94903                | -1,6956  | 3,07499  |
| 36            | 6             | -0,61708                | 2,55232  | 3,64165  |
| 37            | 6             | -4,01922                | 5,89178  | -1,81294 |
| 38            | 6             | -2,6594                 | 5,77732  | 0,30846  |
| 39            | 6             | -4,91057                | 4,69703  | 0,20272  |
| 40            | 6             | 5,68682                 | 5,38706  | -0,82244 |
| 41            | 6             | 4,00318                 | 6,10027  | 0,91714  |
| 42            | 6             | 3,69794                 | 6,7545   | -1,47689 |
| 43            | 6             | -6,20273                | -3,18821 | 3,38878  |
| 44            | 6             | -7,22664                | -1,11048 | 2,44692  |
| 45            | 6             | -5,66432                | -0,93561 | 4,39132  |
| 46            | 6             | -2,04354                | 2,69679  | 3,06233  |
| 47            | 6             | 0,13368                 | 3,87658  | 3,41157  |
| 48            | 6             | -0,7064                 | 2,29804  | 5,16428  |

|     |   |          |          |          |
|-----|---|----------|----------|----------|
| 49  | 6 | -1,26596 | -0,00706 | -4,09572 |
| 50  | 6 | 1,88211  | -2,4156  | 0,05281  |
| 51  | 1 | -1,58481 | -1,02526 | -1,23026 |
| 52  | 1 | 0,76693  | 0,69975  | -2,01473 |
| 53  | 1 | 2,06933  | 5,03896  | -2,3117  |
| 54  | 1 | -1,20677 | 4,76059  | -1,87805 |
| 55  | 1 | -4,55952 | 2,34899  | -0,60492 |
| 56  | 1 | 1,82742  | 2,44013  | 2,25881  |
| 57  | 1 | -1,49146 | -0,04185 | 3,45904  |
| 58  | 1 | -3,35272 | -2,49232 | 3,54102  |
| 59  | 1 | 4,48896  | 3,23374  | 0,77873  |
| 60  | 1 | -5,74072 | -0,56121 | 0,50246  |
| 61  | 1 | -3,13347 | 6,16704  | -2,40713 |
| 62  | 1 | -4,49723 | 6,82151  | -1,46156 |
| 63  | 1 | -4,72608 | 5,36853  | -2,47682 |
| 64  | 1 | -3,14499 | 6,69652  | 0,67581  |
| 65  | 1 | -2,36677 | 5,16978  | 1,17884  |
| 66  | 1 | -1,74324 | 6,07562  | -0,22415 |
| 67  | 1 | -5,33254 | 5,63928  | 0,58761  |
| 68  | 1 | -4,69616 | 4,04489  | 1,06502  |
| 69  | 1 | -5,68535 | 4,21774  | -0,41725 |
| 70  | 1 | 5,84403  | 5,06503  | -1,86435 |
| 71  | 1 | 6,10076  | 4,60979  | -0,16138 |
| 72  | 1 | 6,25978  | 6,31482  | -0,65552 |
| 73  | 1 | 2,93958  | 6,28559  | 1,13871  |
| 74  | 1 | 4,5612   | 7,03636  | 1,08789  |
| 75  | 1 | 4,37464  | 5,35136  | 1,63389  |
| 76  | 1 | 4,28619  | 7,66723  | -1,28892 |
| 77  | 1 | 2,63727  | 6,9984   | -1,30137 |
| 78  | 1 | 3,82515  | 6,48651  | -2,53845 |
| 79  | 1 | -6,42105 | -3,7489  | 2,46583  |
| 80  | 1 | -7,06337 | -3,29272 | 4,07091  |
| 81  | 1 | -5,32981 | -3,65534 | 3,87097  |
| 82  | 1 | -7,11931 | -0,03465 | 2,23172  |
| 83  | 1 | -8,0675  | -1,22853 | 3,14945  |
| 84  | 1 | -7,49467 | -1,62973 | 1,51242  |
| 85  | 1 | -5,48686 | 0,13416  | 4,19406  |
| 86  | 1 | -4,78019 | -1,33808 | 4,91009  |
| 87  | 1 | -6,52541 | -1,02321 | 5,07526  |
| 88  | 1 | -2,55103 | 3,56189  | 3,52276  |
| 89  | 1 | -2,00735 | 2,84799  | 1,97145  |
| 90  | 1 | -2,65796 | 1,80395  | 3,25685  |
| 91  | 1 | -0,41949 | 4,69983  | 3,89279  |
| 92  | 1 | 0,22598  | 4,1095   | 2,3381   |
| 93  | 1 | 1,1442   | 3,85278  | 3,85061  |
| 94  | 1 | -1,25981 | 1,37169  | 5,38453  |
| 95  | 1 | -1,22624 | 3,13466  | 5,66166  |
| 96  | 1 | 0,29984  | 2,20452  | 5,60335  |
| 97  | 1 | -0,80313 | 0,80443  | -4,68302 |
| 98  | 1 | -2,34741 | -0,05977 | -4,30804 |
| 99  | 1 | 2,2323   | -1,60156 | -0,60207 |
| 100 | 1 | 0,81415  | -2,61602 | -0,13601 |
| 101 | 6 | -0,5981  | -1,33303 | -4,4287  |

|     |   |          |          |          |
|-----|---|----------|----------|----------|
| 102 | 1 | -0,56572 | -1,39333 | -5,53298 |
| 103 | 1 | 0,45078  | -1,32373 | -4,06507 |
| 104 | 7 | -1,35156 | -2,46434 | -3,92483 |
| 105 | 1 | 0,31305  | -3,27662 | -2,94805 |
| 106 | 6 | -0,76159 | -3,36165 | -3,20697 |
| 107 | 1 | -2,86675 | -3,08698 | -3,9822  |
| 108 | 8 | -3,53454 | -3,82552 | -3,7433  |
| 109 | 6 | -2,85055 | -4,7095  | -3,01044 |
| 110 | 6 | -1,46567 | -4,52374 | -2,70966 |
| 111 | 1 | 0,26427  | -5,32803 | -1,70218 |
| 112 | 6 | -0,79496 | -5,48644 | -1,92902 |
| 113 | 6 | -1,45238 | -6,61018 | -1,4515  |
| 114 | 1 | -0,92212 | -7,34766 | -0,84598 |
| 115 | 6 | -2,81331 | -6,78521 | -1,75581 |
| 116 | 1 | -3,34117 | -7,66777 | -1,38384 |
| 117 | 6 | -3,50483 | -5,85512 | -2,5213  |
| 118 | 1 | -4,56311 | -5,98482 | -2,7596  |
| 119 | 6 | 2,69324  | -3,68583 | -0,16845 |
| 120 | 1 | 2,37784  | -4,44799 | 0,57371  |
| 121 | 1 | 2,44363  | -4,06326 | -1,17752 |
| 122 | 7 | 4,1221   | -3,43802 | -0,11251 |
| 123 | 1 | 4,34351  | -4,57189 | 1,63197  |
| 124 | 6 | 4,81431  | -3,93806 | 0,85429  |
| 125 | 1 | 5,27147  | -2,61275 | -0,89949 |
| 126 | 8 | 6,25497  | -2,32871 | -1,0141  |
| 127 | 6 | 6,91053  | -2,88834 | 0,00556  |
| 128 | 6 | 6,23957  | -3,7022  | 0,97008  |
| 129 | 1 | 6,44583  | -4,88702 | 2,75909  |
| 130 | 6 | 6,97681  | -4,26882 | 2,02746  |
| 131 | 6 | 8,34276  | -4,05409 | 2,14914  |
| 132 | 1 | 8,90335  | -4,49876 | 2,97397  |
| 133 | 6 | 8,99461  | -3,25435 | 1,19519  |
| 134 | 1 | 10,07068 | -3,07836 | 1,28122  |
| 135 | 6 | 8,29621  | -2,67922 | 0,14063  |
| 136 | 1 | 8,79744  | -2,0552  | -0,6032  |

**Table S11.** For 5 *exo-exo* rotamer, the optimized geometry in Cartesian coordinates, obtained by DFT- calculations.

| Center Number | Atomic number | Coordinates (Angstroms) |          |         |
|---------------|---------------|-------------------------|----------|---------|
|               |               | X                       | Y        | Z       |
| 1             | 6             | -1,79496                | 2,58134  | 4,46652 |
| 2             | 6             | -2,63082                | 2,88611  | 5,54921 |
| 3             | 6             | -2,47964                | 2,25738  | 6,79706 |
| 4             | 6             | -1,42626                | 1,35544  | 6,95902 |
| 5             | 1             | -1,31966                | 0,86156  | 7,92999 |
| 6             | 6             | -0,53235                | 1,0541   | 5,91998 |
| 7             | 6             | -0,74877                | 1,67338  | 4,68456 |
| 8             | 1             | -0,10689                | 1,43088  | 3,83489 |
| 9             | 6             | 0,60654                 | 0,04776  | 6,15761 |
| 10            | 6             | 1,50615                 | 0,55035  | 7,31015 |
| 11            | 1             | 2,31839                 | -0,17147 | 7,50043 |
| 12            | 1             | 0,93782                 | 0,6743   | 8,24512 |
| 13            | 1             | 1,95943                 | 1,5223   | 7,05659 |
| 14            | 6             | 9,6837E-4               | -1,32399 | 6,53807 |
| 15            | 1             | 0,80566                 | -2,05642 | 6,72026 |
| 16            | 1             | -0,63938                | -1,7044  | 5,72602 |
| 17            | 1             | -0,61245                | -1,25832 | 7,45008 |
| 18            | 6             | 1,48709                 | -0,1458  | 4,90968 |
| 19            | 1             | 2,28915                 | -0,86695 | 5,13648 |
| 20            | 1             | 1,96263                 | 0,79827  | 4,59736 |
| 21            | 1             | 0,90789                 | -0,54421 | 4,06086 |
| 22            | 6             | -3,39928                | 5,15728  | 5,55495 |
| 23            | 1             | -2,5468                 | 5,42992  | 4,90724 |
| 24            | 1             | -3,11905                | 5,37052  | 6,60396 |
| 25            | 6             | -4,64412                | 5,95094  | 5,1511  |
| 26            | 1             | -4,92593                | 5,68767  | 4,11281 |
| 27            | 1             | -5,47802                | 5,65712  | 5,81439 |
| 28            | 6             | -4,41172                | 8,13853  | 4,26682 |
| 29            | 1             | -4,63382                | 7,73999  | 3,25815 |
| 30            | 6             | -4,15004                | 9,55725  | 4,3724  |
| 31            | 6             | -4,16571                | 10,3987  | 3,2363  |
| 32            | 1             | -4,3791                 | 9,95869  | 2,25783 |
| 33            | 6             | -3,91023                | 11,75462 | 3,37349 |
| 34            | 1             | -3,9201                 | 12,40794 | 2,49835 |
| 35            | 6             | -3,63539                | 12,30386 | 4,6392  |
| 36            | 1             | -3,43372                | 13,37161 | 4,75789 |
| 37            | 6             | -3,61525                | 11,49531 | 5,7704  |
| 38            | 8             | -3,35235                | 12,00274 | 7,00701 |
| 39            | 6             | -3,87193                | 10,11029 | 5,64464 |
| 40            | 6             | -3,48517                | 2,47728  | 7,92027 |
| 41            | 1             | -2,94394                | 2,52863  | 8,87877 |
| 42            | 1             | -3,99055                | 3,44817  | 7,78637 |
| 43            | 6             | -4,5123                 | 1,35814  | 8,01428 |
| 44            | 6             | -5,54636                | 1,22837  | 7,06489 |
| 45            | 6             | -6,4282                 | 0,12477  | 7,14279 |
| 46            | 6             | -6,30068                | -0,77657 | 8,19849 |
| 47            | 1             | -7,01437                | -1,60609 | 8,24917 |
| 48            | 6             | -5,30329                | -0,65948 | 9,18071 |

|     |   |           |          |          |
|-----|---|-----------|----------|----------|
| 49  | 6 | -4,41688  | 0,41369  | 9,04683  |
| 50  | 1 | -3,61334  | 0,54818  | 9,77587  |
| 51  | 6 | -5,21989  | -1,68332 | 10,32487 |
| 52  | 6 | -4,05412  | -1,39017 | 11,28669 |
| 53  | 1 | -4,15902  | -0,40167 | 11,76283 |
| 54  | 1 | -3,0815   | -1,42767 | 10,76929 |
| 55  | 1 | -4,03805  | -2,14818 | 12,08677 |
| 56  | 6 | -6,53409  | -1,65577 | 11,13935 |
| 57  | 1 | -6,69596  | -0,66013 | 11,58295 |
| 58  | 1 | -6,49574  | -2,39777 | 11,95528 |
| 59  | 1 | -7,40538  | -1,89084 | 10,50802 |
| 60  | 6 | -5,01261  | -3,09949 | 9,73844  |
| 61  | 1 | -4,95844  | -3,84589 | 10,54946 |
| 62  | 1 | -4,07609  | -3,14717 | 9,1595   |
| 63  | 1 | -5,84     | -3,38694 | 9,07073  |
| 64  | 6 | -7,45746  | -0,09143 | 6,04549  |
| 65  | 1 | -8,27045  | -0,72292 | 6,44164  |
| 66  | 1 | -7,88374  | 0,87719  | 5,74985  |
| 67  | 6 | -6,84952  | -0,77169 | 4,82275  |
| 68  | 6 | -6,67094  | -0,10621 | 3,6022   |
| 69  | 6 | -5,99018  | -0,7037  | 2,52796  |
| 70  | 6 | -5,54214  | -2,01736 | 2,68018  |
| 71  | 1 | -5,002    | -2,47364 | 1,84469  |
| 72  | 6 | -5,73818  | -2,74325 | 3,86498  |
| 73  | 6 | -6,3844   | -2,0911  | 4,92034  |
| 74  | 1 | -6,51318  | -2,60177 | 5,87702  |
| 75  | 6 | -5,21089  | -4,18403 | 3,97554  |
| 76  | 6 | -3,67477  | -4,17693 | 3,7924   |
| 77  | 1 | -3,19356  | -3,56669 | 4,57351  |
| 78  | 1 | -3,3832   | -3,76466 | 2,81391  |
| 79  | 1 | -3,28024  | -5,20492 | 3,86064  |
| 80  | 6 | -5,85681  | -5,0552  | 2,8737   |
| 81  | 1 | -5,63064  | -4,67133 | 1,86667  |
| 82  | 1 | -6,95244  | -5,08309 | 2,98933  |
| 83  | 1 | -5,47586  | -6,08864 | 2,93532  |
| 84  | 6 | -5,52861  | -4,82121 | 5,34061  |
| 85  | 1 | -5,05968  | -4,26617 | 6,16921  |
| 86  | 1 | -5,13594  | -5,85079 | 5,36365  |
| 87  | 1 | -6,61442  | -4,87227 | 5,52343  |
| 88  | 6 | -8,44147  | 1,4061   | 3,02303  |
| 89  | 1 | -9,09582  | 0,68856  | 3,54977  |
| 90  | 1 | -8,52442  | 1,21856  | 1,93508  |
| 91  | 6 | -8,89585  | 2,82023  | 3,36982  |
| 92  | 1 | -9,99589  | 2,87009  | 3,22883  |
| 93  | 1 | -8,67849  | 2,98556  | 4,44081  |
| 94  | 6 | -8,92107  | 4,74961  | 2,00257  |
| 95  | 1 | -10,02901 | 4,72626  | 2,03416  |
| 96  | 6 | -8,30862  | 5,84966  | 1,28778  |
| 97  | 6 | -9,08436  | 6,83515  | 0,63661  |
| 98  | 1 | -10,17438 | 6,74644  | 0,65108  |
| 99  | 6 | -8,46762  | 7,89971  | -0,00358 |
| 100 | 1 | -9,06688  | 8,66179  | -0,50606 |
| 101 | 6 | -7,06596  | 8,00962  | -0,0113  |

|     |   |          |          |          |
|-----|---|----------|----------|----------|
| 102 | 1 | -6,56914 | 8,84352  | -0,51354 |
| 103 | 6 | -6,28342 | 7,05178  | 0,6229   |
| 104 | 8 | -4,92045 | 7,14156  | 0,64391  |
| 105 | 6 | -6,89942 | 5,962    | 1,27703  |
| 106 | 6 | -5,65988 | 0,07841  | 1,26297  |
| 107 | 1 | -5,79785 | -0,57966 | 0,38987  |
| 108 | 1 | -6,36389 | 0,91881  | 1,14369  |
| 109 | 6 | -4,22833 | 0,59325  | 1,24921  |
| 110 | 6 | -3,82692 | 1,65959  | 2,0841   |
| 111 | 6 | -2,47635 | 2,06696  | 2,09209  |
| 112 | 6 | -1,56577 | 1,44394  | 1,2332   |
| 113 | 1 | -0,53207 | 1,79993  | 1,24615  |
| 114 | 6 | -1,93439 | 0,40035  | 0,37431  |
| 115 | 6 | -3,2762  | -0,00566 | 0,41913  |
| 116 | 1 | -3,61394 | -0,82215 | -0,22839 |
| 117 | 6 | -0,94805 | -0,29231 | -0,58101 |
| 118 | 6 | -1,42948 | -0,11537 | -2,03988 |
| 119 | 1 | -1,47321 | 0,95248  | -2,30825 |
| 120 | 1 | -2,43336 | -0,54314 | -2,18868 |
| 121 | 1 | -0,7383  | -0,62059 | -2,73619 |
| 122 | 6 | -0,8767  | -1,80062 | -0,24662 |
| 123 | 1 | -0,52705 | -1,95401 | 0,78716  |
| 124 | 1 | -0,17708 | -2,31224 | -0,92963 |
| 125 | 1 | -1,86096 | -2,28453 | -0,34691 |
| 126 | 6 | 0,47371  | 0,28829  | -0,47241 |
| 127 | 1 | 0,88787  | 0,16231  | 0,54143  |
| 128 | 1 | 0,49537  | 1,36019  | -0,7281  |
| 129 | 1 | 1,14041  | -0,23796 | -1,17493 |
| 130 | 6 | -2,0297  | 3,14263  | 3,06799  |
| 131 | 1 | -2,79701 | 3,92812  | 3,1152   |
| 132 | 1 | -1,09263 | 3,59152  | 2,69796  |
| 133 | 7 | -4,39028 | 7,3724   | 5,3104   |
| 134 | 7 | -8,21466 | 3,84861  | 2,60184  |
| 135 | 8 | -3,71084 | 3,76134  | 5,38215  |
| 136 | 8 | -3,83636 | 9,37743  | 6,77366  |
| 137 | 1 | -4,04909 | 8,40559  | 6,46299  |
| 138 | 8 | -5,77755 | 2,1133   | 6,0626   |
| 139 | 1 | -5,04025 | 2,7617   | 5,93317  |
| 140 | 8 | -7,08506 | 1,22644  | 3,46823  |
| 141 | 8 | -6,08053 | 5,07663  | 1,87796  |
| 142 | 1 | -6,70034 | 4,36563  | 2,30075  |
| 143 | 8 | -4,66848 | 2,34847  | 2,89376  |
| 144 | 1 | -5,56996 | 1,94662  | 2,9612   |
| 145 | 1 | -3,39975 | 11,23316 | 7,61511  |
| 146 | 1 | -4,61117 | 6,30432  | 1,05433  |

**Table S12.** For **5** *endo-exo* rotamer, the optimized geometry in Cartesian coordinates, obtained by DFT- calculations.

| Center Number | Atomic number | Coordinates (Angstroms) |          |          |
|---------------|---------------|-------------------------|----------|----------|
|               |               | X                       | Y        | Z        |
| 1             | 6             | 2,50239                 | -1,13744 | -2,84681 |
| 2             | 6             | 1,85912                 | 0,06755  | -3,20273 |
| 3             | 6             | 2,44949                 | 1,29521  | -2,85049 |
| 4             | 6             | 3,74271                 | 1,30086  | -2,31081 |
| 5             | 1             | 4,17644                 | 2,26983  | -2,05355 |
| 6             | 6             | 4,45851                 | 0,12752  | -2,06538 |
| 7             | 6             | 3,7893                  | -1,07902 | -2,30624 |
| 8             | 1             | 4,26901                 | -2,02583 | -2,04    |
| 9             | 6             | 5,88849                 | 0,11863  | -1,50123 |
| 10            | 6             | 6,81659                 | -0,65476 | -2,46597 |
| 11            | 1             | 7,84521                 | -0,68111 | -2,06729 |
| 12            | 1             | 6,84073                 | -0,17046 | -3,45559 |
| 13            | 1             | 6,47928                 | -1,69375 | -2,60493 |
| 14            | 6             | 6,45499                 | 1,5393   | -1,3247  |
| 15            | 1             | 7,48503                 | 1,47864  | -0,93631 |
| 16            | 1             | 5,8594                  | 2,12948  | -0,60937 |
| 17            | 1             | 6,48684                 | 2,08358  | -2,28268 |
| 18            | 6             | 5,88936                 | -0,57812 | -0,12068 |
| 19            | 1             | 6,9104                  | -0,5954  | 0,29804  |
| 20            | 1             | 5,53039                 | -1,61697 | -0,18959 |
| 21            | 1             | 5,23116                 | -0,04144 | 0,58152  |
| 22            | 6             | -0,57512                | -0,00879 | -3,38735 |
| 23            | 1             | -0,81655                | 0,94578  | -2,89072 |
| 24            | 1             | -0,6149                 | -0,80348 | -2,62811 |
| 25            | 6             | -1,59004                | -0,29619 | -4,49661 |
| 26            | 1             | -1,59401                | 0,52474  | -5,24121 |
| 27            | 1             | -1,29742                | -1,22771 | -5,01246 |
| 28            | 6             | -3,85349                | 0,35391  | -4,11782 |
| 29            | 1             | -3,72584                | 1,19691  | -4,82461 |
| 30            | 6             | -5,1322                 | 0,22057  | -3,45012 |
| 31            | 6             | -6,20162                | 1,11148  | -3,69491 |
| 32            | 1             | -6,06568                | 1,91535  | -4,42416 |
| 33            | 6             | -7,40231                | 0,96151  | -3,01629 |
| 34            | 1             | -8,22965                | 1,64942  | -3,20376 |
| 35            | 6             | -7,56921                | -0,07669 | -2,08248 |
| 36            | 1             | -8,50837                | -0,19986 | -1,53746 |
| 37            | 6             | -6,53271                | -0,96884 | -1,82902 |
| 38            | 8             | -6,66832                | -1,9824  | -0,93057 |
| 39            | 6             | -5,30131                | -0,8239  | -2,50917 |
| 40            | 6             | 1,70449                 | 2,62493  | -2,94589 |
| 41            | 1             | 2,21921                 | 3,29863  | -3,65253 |
| 42            | 1             | 0,69316                 | 2,45362  | -3,34147 |
| 43            | 6             | 1,03229                 | 3,20097  | 0,7813   |
| 44            | 6             | 0,91018                 | 2,71745  | -0,53271 |
| 45            | 6             | 1,66745                 | 3,29209  | -1,57929 |
| 46            | 6             | 2,46709                 | 4,397    | -1,28961 |
| 47            | 1             | 3,03893                 | 4,83698  | -2,11365 |
| 48            | 6             | 2,58077                 | 4,94165  | 0,00246  |



|     |   |          |          |          |
|-----|---|----------|----------|----------|
| 49  | 6 | 1,86337  | 4,30632  | 1,02025  |
| 50  | 1 | 1,92739  | 4,67877  | 2,0461   |
| 51  | 6 | 3,47535  | 6,16872  | 0,24565  |
| 52  | 6 | 3,47334  | 6,6098   | 1,72057  |
| 53  | 1 | 2,46244  | 6,88935  | 2,05964  |
| 54  | 1 | 3,85834  | 5,81696  | 2,38273  |
| 55  | 1 | 4,12347  | 7,49165  | 1,84138  |
| 56  | 6 | 2,96914  | 7,35212  | -0,61136 |
| 57  | 1 | 1,93682  | 7,62007  | -0,33414 |
| 58  | 1 | 3,61045  | 8,23704  | -0,45925 |
| 59  | 1 | 2,97851  | 7,10697  | -1,68489 |
| 60  | 6 | 4,93185  | 5,83525  | -0,15368 |
| 61  | 1 | 5,58309  | 6,71097  | 0,00902  |
| 62  | 1 | 5,3197   | 4,9983   | 0,44942  |
| 63  | 1 | 5,00725  | 5,55157  | -1,215   |
| 64  | 6 | 0,27603  | 2,5474   | 1,93078  |
| 65  | 1 | 0,27819  | 3,2482   | 2,78129  |
| 66  | 1 | -0,78127 | 2,40794  | 1,64798  |
| 67  | 6 | 0,86934  | 1,22403  | 2,40903  |
| 68  | 6 | 0,35339  | -0,0201  | 2,02334  |
| 69  | 6 | 0,93973  | -1,23506 | 2,41498  |
| 70  | 6 | 2,05271  | -1,16788 | 3,2574   |
| 71  | 1 | 2,51161  | -2,11106 | 3,56891  |
| 72  | 6 | 2,59491  | 0,04877  | 3,70044  |
| 73  | 6 | 1,98993  | 1,22816  | 3,25182  |
| 74  | 1 | 2,39266  | 2,19777  | 3,55299  |
| 75  | 6 | 3,80245  | 0,04543  | 4,65366  |
| 76  | 6 | 3,39992  | -0,65421 | 5,97313  |
| 77  | 1 | 2,57044  | -0,11924 | 6,46322  |
| 78  | 1 | 3,07933  | -1,69334 | 5,79931  |
| 79  | 1 | 4,25677  | -0,67467 | 6,66731  |
| 80  | 6 | 4,97609  | -0,7223  | 4,00311  |
| 81  | 1 | 4,70835  | -1,76575 | 3,77594  |
| 82  | 1 | 5,28679  | -0,24128 | 3,06229  |
| 83  | 1 | 5,84067  | -0,73673 | 4,68769  |
| 84  | 6 | 4,28635  | 1,4679   | 4,98873  |
| 85  | 1 | 3,50607  | 2,05545  | 5,49947  |
| 86  | 1 | 5,1542   | 1,40789  | 5,66515  |
| 87  | 1 | 4,60248  | 2,01336  | 4,08478  |
| 88  | 6 | -2,05007 | -0,07428 | 1,77764  |
| 89  | 1 | -2,15938 | -1,00681 | 2,35783  |
| 90  | 1 | -2,12707 | 0,77979  | 2,47234  |
| 91  | 6 | -3,1187  | 0,01159  | 0,68714  |
| 92  | 1 | -2,99792 | 0,95514  | 0,11644  |
| 93  | 1 | -2,99157 | -0,82677 | -0,02214 |
| 94  | 6 | -5,30467 | 0,83821  | 1,09952  |
| 95  | 1 | -5,07721 | 1,71169  | 0,45848  |
| 96  | 6 | -6,62364 | 0,77309  | 1,68635  |
| 97  | 6 | -7,5815  | 1,78981  | 1,46683  |
| 98  | 1 | -7,31275 | 2,64282  | 0,83761  |
| 99  | 6 | -8,84057 | 1,69482  | 2,0386   |
| 100 | 1 | -9,58181 | 2,47919  | 1,87125  |
| 101 | 6 | -9,17829 | 0,58695  | 2,83705  |

|     |   |           |          |          |
|-----|---|-----------|----------|----------|
| 102 | 1 | -10,16927 | 0,50045  | 3,29003  |
| 103 | 6 | -8,25482  | -0,42745 | 3,06392  |
| 104 | 8 | -8,56082  | -1,51088 | 3,82909  |
| 105 | 6 | -6,9653   | -0,34004 | 2,48981  |
| 106 | 6 | 0,43068   | -2,5922  | 1,93333  |
| 107 | 1 | 0,48795   | -3,29699 | 2,77846  |
| 108 | 1 | -0,63613  | -2,52322 | 1,66018  |
| 109 | 6 | 1,22175   | -3,18137 | 0,77243  |
| 110 | 6 | 1,05278   | -2,6954  | -0,53492 |
| 111 | 6 | 1,84465   | -3,19434 | -1,59377 |
| 112 | 6 | 2,72689   | -4,23994 | -1,32372 |
| 113 | 1 | 3,32357   | -4,62617 | -2,15707 |
| 114 | 6 | 2,89105   | -4,78977 | -0,03915 |
| 115 | 6 | 2,13655   | -4,22245 | 0,99218  |
| 116 | 1 | 2,23805   | -4,60046 | 2,01294  |
| 117 | 6 | 3,87798   | -5,94831 | 0,18212  |
| 118 | 6 | 3,92203   | -6,40549 | 1,65146  |
| 119 | 1 | 2,93802   | -6,76435 | 1,99488  |
| 120 | 1 | 4,2523    | -5,59365 | 2,32014  |
| 121 | 1 | 4,63768   | -7,23723 | 1,75628  |
| 122 | 6 | 5,30163   | -5,50017 | -0,22372 |
| 123 | 1 | 5,34624   | -5,19998 | -1,28231 |
| 124 | 1 | 6,01897   | -6,32558 | -0,07673 |
| 125 | 1 | 5,62959   | -4,6433  | 0,38706  |
| 126 | 6 | 3,45566   | -7,15645 | -0,68568 |
| 127 | 1 | 3,43725   | -6,89871 | -1,75614 |
| 128 | 1 | 2,44897   | -7,50515 | -0,40414 |
| 129 | 1 | 4,16345   | -7,99189 | -0,5494  |
| 130 | 6 | 1,82383   | -2,5037  | -2,94895 |
| 131 | 1 | 0,79739   | -2,38179 | -3,32341 |
| 132 | 1 | 2,35941   | -3,13744 | -3,67668 |
| 133 | 7 | -2,8947   | -0,48062 | -3,88595 |
| 134 | 7 | -4,42741  | -0,09116 | 1,30451  |
| 135 | 8 | 0,72332   | 0,04419  | -4,00296 |
| 136 | 8 | -4,3278   | -1,70693 | -2,21027 |
| 137 | 1 | -3,52543  | -1,42782 | -2,83366 |
| 138 | 8 | 0,07631   | 1,69767  | -0,87539 |
| 139 | 1 | -0,25579  | 1,20822  | -0,08792 |
| 140 | 8 | -0,74583  | -0,0512  | 1,13237  |
| 141 | 8 | -6,11483  | -1,35151 | 2,74872  |
| 142 | 1 | -5,24983  | -1,1074  | 2,23515  |
| 143 | 8 | 0,13739   | -1,74079 | -0,85599 |
| 144 | 1 | -0,21777  | -1,27665 | -0,06207 |
| 145 | 1 | -5,80987  | -2,4586  | -0,94764 |
| 146 | 1 | -7,75631  | -2,07328 | 3,81625  |

**Table S13.** For 6 *exo-exo* rotamer, the optimized geometry in Cartesian coordinates, obtained by DFT- calculations.

| Center Number | Atomic number | Coordinates (Angstroms) |          |          |
|---------------|---------------|-------------------------|----------|----------|
|               |               | X                       | Y        | Z        |
| 1             | 8             | -0,99247                | 0,24729  | 0,36456  |
| 2             | 8             | 1,56281                 | -2,21187 | -0,31971 |
| 3             | 6             | 1,45127                 | -0,61504 | 2,67217  |
| 4             | 8             | -0,663                  | -0,99745 | -2,662   |
| 5             | 6             | 5,65038                 | -2,70227 | -1,19986 |
| 6             | 6             | 4,67512                 | -2,53113 | -2,19781 |
| 7             | 6             | 3,32412                 | -2,34195 | -1,90635 |
| 8             | 6             | 1,0537                  | 0,6641   | 3,0889   |
| 9             | 6             | 2,02265                 | 1,62863  | 3,39664  |
| 10            | 6             | 3,39218                 | 1,35709  | 3,30179  |
| 11            | 6             | 3,76843                 | 0,06314  | 2,90371  |
| 12            | 6             | 2,82554                 | -0,9168  | 2,58971  |
| 13            | 6             | 2,41625                 | 1,88809  | -2,81272 |
| 14            | 6             | 2,68383                 | 0,53943  | -3,0633  |
| 15            | 6             | 1,67972                 | -0,43743 | -3,02333 |
| 16            | 16            | 3,35748                 | -2,59566 | 2,17036  |
| 17            | 6             | 1,08613                 | 2,23252  | -2,53254 |
| 18            | 6             | 2,87528                 | -2,33877 | -0,56134 |
| 19            | 6             | -1,63517                | 3,79502  | -0,22872 |
| 20            | 8             | 0,50881                 | -1,54844 | 2,26089  |
| 21            | 6             | 0,34225                 | -0,07896 | -2,76451 |
| 22            | 6             | 0,06482                 | 1,28155  | -2,50267 |
| 23            | 16            | -1,62336                | 1,80615  | -2,14128 |
| 24            | 6             | -1,01154                | 2,12968  | 1,88912  |
| 25            | 16            | 2,1487                  | -2,16748 | -3,25296 |
| 26            | 6             | 5,20794                 | -2,65004 | 0,12496  |
| 27            | 6             | 3,85453                 | -2,47087 | 0,44674  |
| 28            | 6             | -1,56345                | 4,35941  | 1,05722  |
| 29            | 16            | -0,7046                 | 1,04035  | 3,28636  |
| 30            | 6             | -1,13378                | 1,56319  | 0,60307  |
| 31            | 6             | -1,23094                | 3,49709  | 2,10601  |
| 32            | 6             | -1,42127                | 2,43752  | -0,47386 |
| 33            | 6             | 4,4718                  | 2,39597  | 3,64808  |
| 34            | 6             | 7,12333                 | -2,91074 | -1,58747 |
| 35            | 6             | -1,83132                | 5,86012  | 1,2562   |
| 36            | 6             | 3,50292                 | 2,97549  | -2,84257 |
| 37            | 6             | 5,38426                 | 2,61372  | 2,41909  |
| 38            | 6             | 3,86483                 | 3,75306  | 4,04669  |
| 39            | 6             | 5,31802                 | 1,87248  | 4,83194  |
| 40            | 6             | 8,02874                 | -3,07814 | -0,35414 |
| 41            | 6             | 7,24861                 | -4,18269 | -2,45751 |
| 42            | 6             | 7,62174                 | -1,68811 | -2,39264 |
| 43            | 6             | -3,27233                | 6,18529  | 0,79926  |
| 44            | 6             | -0,82831                | 6,68096  | 0,41279  |
| 45            | 6             | -1,68334                | 6,28452  | 2,72828  |
| 46            | 6             | 4,8944                  | 2,3991   | -3,1609  |
| 47            | 6             | 3,56838                 | 3,66614  | -1,46051 |
| 48            | 6             | 3,15153                 | 4,02298  | -3,92406 |

|     |   |          |          |          |
|-----|---|----------|----------|----------|
| 49  | 6 | 0,12499  | -2,4958  | 3,29866  |
| 50  | 6 | -1,09158 | -1,65889 | -3,86226 |
| 51  | 1 | -0,80219 | -0,21086 | 1,22051  |
| 52  | 1 | 1,389    | -2,19193 | 0,65446  |
| 53  | 1 | 4,9592   | -2,53563 | -3,25359 |
| 54  | 1 | 1,67116  | 2,60916  | 3,72089  |
| 55  | 1 | 4,82417  | -0,21054 | 2,83667  |
| 56  | 1 | 3,70046  | 0,207    | -3,27802 |
| 57  | 1 | 0,81503  | 3,27184  | -2,3306  |
| 58  | 1 | -1,86995 | 4,42202  | -1,09306 |
| 59  | 1 | 5,90989  | -2,76108 | 0,95323  |
| 60  | 1 | -1,14338 | 3,86618  | 3,12922  |
| 61  | 1 | 6,17168  | 3,34678  | 2,66122  |
| 62  | 1 | 4,80507  | 2,99827  | 1,56451  |
| 63  | 1 | 5,87674  | 1,68041  | 2,10458  |
| 64  | 1 | 6,10316  | 2,60412  | 5,08559  |
| 65  | 1 | 4,69026  | 1,71607  | 5,72388  |
| 66  | 1 | 5,81109  | 0,91791  | 4,59033  |
| 67  | 1 | 4,67696  | 4,46262  | 4,27251  |
| 68  | 1 | 3,26011  | 4,18317  | 3,23188  |
| 69  | 1 | 3,23464  | 3,67045  | 4,94713  |
| 70  | 1 | 9,06983  | -3,23082 | -0,68176 |
| 71  | 1 | 8,00895  | -2,18412 | 0,29046  |
| 72  | 1 | 7,73582  | -3,9523  | 0,24997  |
| 73  | 1 | 8,29916  | -4,33734 | -2,75636 |
| 74  | 1 | 6,64373  | -4,10849 | -3,37474 |
| 75  | 1 | 6,91245  | -5,07178 | -1,90019 |
| 76  | 1 | 8,67571  | -1,82947 | -2,686   |
| 77  | 1 | 7,03323  | -1,53967 | -3,31154 |
| 78  | 1 | 7,55049  | -0,76796 | -1,79029 |
| 79  | 1 | -3,47675 | 7,2623   | 0,92254  |
| 80  | 1 | -3,42956 | 5,92924  | -0,26007 |
| 81  | 1 | -4,00732 | 5,62215  | 1,39637  |
| 82  | 1 | -1,01793 | 7,76004  | 0,54114  |
| 83  | 1 | -0,91492 | 6,4497   | -0,66034 |
| 84  | 1 | 0,20789  | 6,47204  | 0,72474  |
| 85  | 1 | -1,88729 | 7,36357  | 2,82081  |
| 86  | 1 | -2,39619 | 5,75224  | 3,3789   |
| 87  | 1 | -0,66289 | 6,10325  | 3,10415  |
| 88  | 1 | 5,63568  | 3,21475  | -3,1662  |
| 89  | 1 | 4,91783  | 1,91883  | -4,15267 |
| 90  | 1 | 5,21119  | 1,65985  | -2,40715 |
| 91  | 1 | 3,91604  | 4,81804  | -3,94533 |
| 92  | 1 | 4,34077  | 4,4539   | -1,46647 |
| 93  | 1 | 2,60763  | 4,13289  | -1,19268 |
| 94  | 1 | 3,82097  | 2,93529  | -0,67533 |
| 95  | 1 | 2,17607  | 4,49552  | -3,72999 |
| 96  | 1 | 3,11006  | 3,55569  | -4,92107 |
| 97  | 1 | -0,47967 | -1,96903 | 4,05736  |
| 98  | 1 | 1,04337  | -2,89221 | 3,76373  |
| 99  | 1 | -1,33455 | -0,91508 | -4,64409 |
| 100 | 1 | -0,3053  | -2,34023 | -4,23632 |
| 101 | 6 | -0,65318 | -3,65658 | 2,68768  |

|     |   |          |          |          |
|-----|---|----------|----------|----------|
| 102 | 1 | -0,54667 | -4,51854 | 3,38002  |
| 103 | 1 | -0,16227 | -3,93635 | 1,73767  |
| 104 | 7 | -2,05238 | -3,35527 | 2,44058  |
| 105 | 1 | -2,63511 | -4,94594 | 3,66715  |
| 106 | 6 | -2,93942 | -4,10666 | 3,00863  |
| 107 | 1 | -3,03874 | -2,35274 | 1,58781  |
| 108 | 8 | -3,98395 | -2,06329 | 1,31092  |
| 109 | 6 | -4,82246 | -2,89494 | 1,95959  |
| 110 | 6 | -4,35964 | -3,92114 | 2,82072  |
| 111 | 1 | -4,91076 | -5,55123 | 4,13636  |
| 112 | 6 | -5,28616 | -4,76365 | 3,47668  |
| 113 | 6 | -6,64558 | -4,58553 | 3,27797  |
| 114 | 1 | -7,36797 | -5,23143 | 3,78169  |
| 115 | 6 | -7,10394 | -3,57241 | 2,42121  |
| 116 | 1 | -8,17293 | -3,42126 | 2,24966  |
| 117 | 6 | -6,21504 | -2,72763 | 1,75735  |
| 118 | 8 | -6,69782 | -1,76521 | 0,93513  |
| 119 | 6 | -2,32937 | -2,47873 | -3,50172 |
| 120 | 1 | -2,08598 | -3,0767  | -2,60301 |
| 121 | 1 | -2,53328 | -3,17442 | -4,33241 |
| 122 | 7 | -3,50832 | -1,64806 | -3,29178 |
| 123 | 1 | -2,97348 | -1,1906  | -1,31247 |
| 124 | 6 | -3,678   | -1,06018 | -2,14925 |
| 125 | 1 | -4,73275 | -1,19296 | -4,09482 |
| 126 | 8 | -5,63831 | -0,65043 | -4,17791 |
| 127 | 6 | -5,75963 | -0,04015 | -2,98739 |
| 128 | 6 | -4,82355 | -0,19741 | -1,93977 |
| 129 | 1 | -4,27283 | 0,39637  | 0,06766  |
| 130 | 6 | -5,02065 | 0,49963  | -0,7235  |
| 131 | 6 | -6,13254 | 1,31572  | -0,5608  |
| 132 | 1 | -6,28463 | 1,85544  | 0,37644  |
| 133 | 6 | -7,07143 | 1,45908  | -1,59876 |
| 134 | 1 | -7,95182 | 2,09548  | -1,47831 |
| 135 | 6 | -6,8916  | 0,79176  | -2,80444 |
| 136 | 8 | -7,77609 | 0,91313  | -3,8323  |
| 137 | 1 | -5,95037 | -1,26701 | 0,53506  |
| 138 | 1 | -7,40928 | 0,34576  | -4,54635 |

**Table S14.** For 6 *endo-exo* rotamer, the optimized geometry in Cartesian coordinates, obtained by DFT- calculations.

| Center Number | Atomic number | Coordinates (Angstroms) |          |          |
|---------------|---------------|-------------------------|----------|----------|
|               |               | X                       | Y        | Z        |
| 1             | 8             | -1,43512                | -2,02034 | -1,1791  |
| 2             | 8             | 0,80272                 | 0,74335  | -0,45403 |
| 3             | 6             | 0,2848                  | -1,77101 | 1,94057  |
| 4             | 8             | -1,03119                | 0,37227  | -2,71299 |
| 5             | 6             | 1,22962                 | 4,31696  | 1,72303  |
| 6             | 6             | 0,58386                 | 4,3072   | 0,48297  |
| 7             | 6             | 0,40946                 | 3,12261  | -0,24635 |
| 8             | 6             | -1,0191                 | -2,29592 | 1,9479   |
| 9             | 6             | -2,0755                 | -1,58162 | 2,52847  |
| 10            | 6             | -1,88257                | -0,31682 | 3,09154  |
| 11            | 6             | -0,59074                | 0,22354  | 3,03215  |
| 12            | 6             | 0,46783                 | -0,46914 | 2,44346  |
| 13            | 6             | -4,28021                | 2,57591  | -1,15155 |
| 14            | 6             | -2,98823                | 3,11594  | -1,193   |
| 15            | 6             | -1,90712                | 2,41195  | -1,74032 |
| 16            | 16            | -0,28604                | 3,2035   | -1,90395 |
| 17            | 6             | -4,46076                | 1,29255  | -1,69297 |
| 18            | 6             | 0,89596                 | 1,89053  | 0,23798  |
| 19            | 6             | -4,0126                 | -4,02374 | 0,46753  |
| 20            | 8             | 1,35636                 | -2,51476 | 1,51051  |
| 21            | 6             | -2,10899                | 1,12142  | -2,25842 |
| 22            | 6             | -3,4015                 | 0,56221  | -2,23509 |
| 23            | 16            | -3,70546                | -1,05466 | -2,99436 |
| 24            | 6             | -2,77106                | -3,44062 | 0,1861   |
| 25            | 16            | -1,33875                | -3,89527 | 1,17146  |
| 26            | 6             | 1,65807                 | 3,07502  | 2,22471  |
| 27            | 6             | 1,49481                 | 1,88027  | 1,52256  |
| 28            | 6             | -5,17193                | -3,71768 | -0,25903 |
| 29            | 16            | 2,06943                 | 0,34061  | 2,25077  |
| 30            | 6             | -2,6465                 | -2,52163 | -0,88123 |
| 31            | 6             | -5,04723                | -2,75944 | -1,27549 |
| 32            | 6             | -3,81998                | -2,1653  | -1,58284 |
| 33            | 6             | -3,01223                | 0,47838  | 3,76672  |
| 34            | 6             | 1,45537                 | 5,59818  | 2,54225  |
| 35            | 6             | -6,53915                | -4,35792 | 0,03451  |
| 36            | 6             | -5,49026                | 3,35762  | -0,61152 |
| 37            | 6             | -2,68377                | 0,64727  | 5,2682   |
| 38            | 6             | -4,37479                | -0,22732 | 3,64188  |
| 39            | 6             | -3,1255                 | 1,87249  | 3,10711  |
| 40            | 6             | 0,73485                 | 5,47341  | 3,90484  |
| 41            | 6             | 2,97105                 | 5,79188  | 2,77872  |
| 42            | 6             | 0,91531                 | 6,84741  | 1,82333  |
| 43            | 6             | -6,46712                | -5,37388 | 1,18857  |
| 44            | 6             | -7,03996                | -5,09462 | -1,22929 |
| 45            | 6             | -7,55223                | -3,25569 | 0,42158  |
| 46            | 6             | -6,26494                | 2,49762  | 0,41291  |
| 47            | 6             | -5,07144                | 4,66809  | 0,07956  |
| 48            | 6             | -6,42122                | 3,70128  | -1,79859 |

|     |   |          |          |          |
|-----|---|----------|----------|----------|
| 49  | 6 | 1,60572  | -2,50314 | 0,0779   |
| 50  | 6 | -0,78779 | 0,4755   | -4,14539 |
| 51  | 1 | -1,50691 | -1,36412 | -1,91749 |
| 52  | 1 | 0,39178  | 0,92732  | -1,33556 |
| 53  | 1 | 0,20593  | 5,2309   | 0,04178  |
| 54  | 1 | -3,06472 | -2,0408  | 2,52198  |
| 55  | 1 | -0,39139 | 1,22099  | 3,43003  |
| 56  | 1 | -2,79212 | 4,11799  | -0,80864 |
| 57  | 1 | -5,45247 | 0,83457  | -1,71185 |
| 58  | 1 | -4,04881 | -4,7313  | 1,29789  |
| 59  | 1 | 2,1339   | 3,01242  | 3,20712  |
| 60  | 1 | -5,91717 | -2,45802 | -1,86463 |
| 61  | 1 | -3,47366 | 1,23334  | 5,76813  |
| 62  | 1 | -2,61287 | -0,3338  | 5,76471  |
| 63  | 1 | -1,72581 | 1,17069  | 5,41353  |
| 64  | 1 | -5,15131 | 0,38768  | 4,12547  |
| 65  | 1 | -4,37024 | -1,21038 | 4,14001  |
| 66  | 1 | -4,66245 | -0,37164 | 2,58752  |
| 67  | 1 | -3,94696 | 2,44362  | 3,57265  |
| 68  | 1 | -3,3287  | 1,77725  | 2,02827  |
| 69  | 1 | -2,20039 | 2,45811  | 3,22418  |
| 70  | 1 | 0,89792  | 6,38397  | 4,50573  |
| 71  | 1 | 1,1091   | 4,61593  | 4,48576  |
| 72  | 1 | -0,35032 | 5,34255  | 3,76286  |
| 73  | 1 | 3,14889  | 6,70122  | 3,37726  |
| 74  | 1 | 3,40953  | 4,93941  | 3,32059  |
| 75  | 1 | 3,50568  | 5,89632  | 1,82115  |
| 76  | 1 | 1,10791  | 7,73827  | 2,44274  |
| 77  | 1 | 1,41028  | 7,00219  | 0,85079  |
| 78  | 1 | -0,17275 | 6,78461  | 1,65751  |
| 79  | 1 | -7,46493 | -5,81175 | 1,35309  |
| 80  | 1 | -5,77234 | -6,19883 | 0,96209  |
| 81  | 1 | -6,15079 | -4,89923 | 2,13165  |
| 82  | 1 | -8,0265  | -5,54962 | -1,03833 |
| 83  | 1 | -6,33982 | -5,89491 | -1,51796 |
| 84  | 1 | -7,14382 | -4,4092  | -2,08515 |
| 85  | 1 | -8,5397  | -3,7022  | 0,6271   |
| 86  | 1 | -7,67825 | -2,51774 | -0,38637 |
| 87  | 1 | -7,2199  | -2,71951 | 1,32524  |
| 88  | 1 | -7,13664 | 3,06055  | 0,78553  |
| 89  | 1 | -5,62821 | 2,23841  | 1,27298  |
| 90  | 1 | -6,63849 | 1,56171  | -0,03057 |
| 91  | 1 | -5,96703 | 5,17193  | 0,4771   |
| 92  | 1 | -4,38636 | 4,48076  | 0,92243  |
| 93  | 1 | -4,58491 | 5,36526  | -0,62158 |
| 94  | 1 | -7,30348 | 4,25638  | -1,43842 |
| 95  | 1 | -5,89779 | 4,32655  | -2,53966 |
| 96  | 1 | -6,77567 | 2,79201  | -2,3095  |
| 97  | 1 | 2,02486  | -1,52238 | -0,20837 |
| 98  | 1 | 0,65522  | -2,65731 | -0,45603 |
| 99  | 1 | -1,65237 | 0,04938  | -4,68304 |
| 100 | 1 | -0,66528 | 1,53956  | -4,41051 |
| 101 | 6 | 2,546    | -3,64938 | -0,2621  |

|     |   |         |          |          |
|-----|---|---------|----------|----------|
| 102 | 1 | 2,14603 | -4,57895 | 0,1839   |
| 103 | 1 | 2,50249 | -3,79901 | -1,35777 |
| 104 | 7 | 3,95435 | -3,53945 | 0,10054  |
| 105 | 1 | 3,72543 | -1,84618 | 1,32479  |
| 106 | 6 | 4,3928  | -2,60248 | 0,87924  |
| 107 | 1 | 5,24036 | -4,31996 | -0,24912 |
| 108 | 8 | 6,28493 | -4,45554 | -0,18804 |
| 109 | 6 | 6,69341 | -3,46086 | 0,62044  |
| 110 | 6 | 5,80714 | -2,51497 | 1,18792  |
| 111 | 1 | 5,63129 | -0,76916 | 2,45503  |
| 112 | 6 | 6,32275 | -1,49843 | 2,02367  |
| 113 | 6 | 7,68408 | -1,4316  | 2,28191  |
| 114 | 1 | 8,08357 | -0,64622 | 2,92737  |
| 115 | 6 | 8,56438 | -2,37253 | 1,71642  |
| 116 | 1 | 9,63866 | -2,32898 | 1,91401  |
| 117 | 6 | 8,07993 | -3,38171 | 0,89192  |
| 118 | 8 | 8,90602 | -4,3078  | 0,32838  |
| 119 | 6 | 0,47252 | -0,30191 | -4,49319 |
| 120 | 1 | 0,38849 | -1,34141 | -4,11313 |
| 121 | 1 | 0,5026  | -0,35624 | -5,59835 |
| 122 | 7 | 1,67164 | 0,36331  | -4,02294 |
| 123 | 1 | 2,42529 | -1,38314 | -3,1445  |
| 124 | 6 | 2,56587 | -0,30764 | -3,37106 |
| 125 | 1 | 2,34703 | 1,83505  | -4,07396 |
| 126 | 8 | 3,13699 | 2,45779  | -3,84495 |
| 127 | 6 | 4,01131 | 1,68088  | -3,17307 |
| 128 | 6 | 3,78779 | 0,30861  | -2,90806 |
| 129 | 1 | 4,58425 | -1,48389 | -1,98091 |
| 130 | 6 | 4,76084 | -0,42542 | -2,19045 |
| 131 | 6 | 5,91915 | 0,19607  | -1,75033 |
| 132 | 1 | 6,6623  | -0,36845 | -1,1834  |
| 133 | 6 | 6,13868 | 1,55898  | -2,01766 |
| 134 | 1 | 7,04746 | 2,05934  | -1,67367 |
| 135 | 6 | 5,19835 | 2,30202  | -2,7234  |
| 136 | 8 | 5,38961 | 3,62418  | -2,99106 |
| 137 | 1 | 8,31074 | -4,89153 | -0,1917  |
| 138 | 1 | 4,58934 | 3,90618  | -3,48445 |
